# Supplementary material for: Switching extended 1,3-diequatorial and bent 1,3-diaxial states of a disubstituted hinge sugar by ligand exchange reactions on Pt(ii)Electronic supplementary information (ESI) available: experimental procedures and full characterization of the reported compounds. See http://www.rsc.org/suppdata/cc/b3/b311811h/
Source: Royal Society of Chemistry journal article supplement (doi:10.1039/b311811h), 2003-12-19
Supplement: b311811h.doc [file b311811h.doc]

# Supplementary Information

Takuhiro Izumi, Hironobu Hashimoto and Hideya Yuasa

Switching extended 1,3-diequatorial and bent 1,3-diaxial states of a disubstituted hinge sugar by ligand exchange reactions on Pt(II)

**Experimental Procedures**

General.

All solvents and reagents used were reagent grade and, in cases where further purification was required, standard procedures (Perrin, D.D.; Armarego, W.L.; Perrin, D.R. Purification of Laboratory Compounds. 2nd ed. Pergamon Press, London. 1980.) were followed. Solution transfers where anhydrous conditions were required were done under dry argon using syringes. Thin-layer chromatograms (TLC) were performed on precoated silica gel Merck 60-F254 plates (Art 5715) and visualized by quenching of fluorescence and/or by charring after spraying with 1 % CeSO4-1.5 % (NH4)6Mo7O24·4H2O-10 % H2SO4. Column chromatography was performed on Merck Kieselges 60 (Art 7734), Wako gel C-300, or Kanto Silica gel 60N (spherical, neutral) with the solvent systems specified

Optical rotations were determined with a Horiba SEPA-200 polarimeter using 1 dm or 0.1 dm length cell. 1H NMR (1D, COSY, 2D-NOESY, HMQC, and HMBC) spectra were recorded at 400 MHz (Varian Unity-400) with internal DOH ( 4.8 in D2O or CD3OD). 1D-TOCSY and 1D-NOESY were measured with Brucker DMX400. Chemical shifts are expressed in ppm referenced to the solvent, as an internal standard.The multiplicity of signals is abbreviated as follows: s = singlet, d = doublet, dd = doublet of doublets, t = triplet, dt = doublet of triplets, ddd = doublet of doublets of doublets, br = broad signal, m = multiplet. 13C NMR spectra were recorded at 67.8 MHz (JEOL JNM-EX-270) or 100.6 MHz (Varian Unity-400) with internal CD3OD ( 49.0 in CD3OD) or external acetone ( 30.89 in D2O) as the reference standard. High resolution mass spectra (HRMS) were recorded on Mariner Biospectrometry Workstation ESI-TOF MS.

**Methyl 2,4-*N*-carbonyl-2,4-diamino-2,4-dideoxy-****-D-xylopyranoside (3).**

To a stirred solution of methyl 2,4-diamino-2,4-dideoxy--D-xylopyranoside (**1**; 99.5 mg, 613.5 mol) in DMF (6 mL) was added 1,1’-carbonyldiimidazole (121.1 mg, 746.8 mol). After 2 h, the solution was concentrated and the residue was dissolved in H2O, which was passed through the column of Dowex 50 (H+) ( 1.5 x 5.0 cm) to remove imidazole. The elute was further purified by silica gel chromatography (60N, CHCl3-MeOH, 8 : 1) to give **3** (88.4 mg, 77 %) as a foam: *R*f 0.23 (CHCl3-MeOH, 8 : 1), **[****]D23**–140.6° (*c* 1.33 in MeOH); 1H NMR (400 MHz, CD3OD, 298K)  4.575 (m, 1H, *J*1,2 = 2.1 Hz, *J*1,3 = 1.4 Hz, *J*1,5b = 0.8 Hz, H-1), 4.180 (d, 1H, *J*5a,5b = 11.8 Hz, H-5a), 4.056 (m, 1H, *J*2,3 = *J*3,4 = 3.8 Hz, *J*3,5b = 1.4 Hz, H-3), 3.411 (s, 3H, OMe), 3.410 (m, 1H, *J*4,5b = 2.0 Hz, H-5b), 3.275 (m, 1H, *J*2,4 = 0.6 Hz, H-2), 3.182 (m, 1H, H-4) ; 13C NMR (100.6 MHz, CD3OD, 298K)  160.20 (C=O), 103.48(C-1), 65.04 (C-3), 60.74 (C-5), 56.00 (OMe), 50.77 (C-4), 50.72 (C-2). HRMS calcd. for [C7H12N2O4 +H]+ 189.0875, found 189.0875. Anal.calcd. for C7H12N2O4･1/6H2O: C 43.98, H 6.50, N 14.65; found: C 44.28, H 6.65, N 14.31. 1H NMR, 13C NMR, COSY, and HMQC are shown in Figure S1-4.

**Optical rotation change in the carbonylation of 1.**

The optical rotation ) at 0 min was observed for the solution (26 mM) of **1** (8.4 mg, 51.8 mol) in DMF (2.0 mL). To this solution, the solution of compound **1** (1.35 mg, 8.28 mol) in DMF (81 L) and then the solution of 1,1’-carbonyldiimidazole (10.0 mg, 61.7 mol) in DMF (200 L) were added and the time course of  was followed (Figure S5).

The first order rate constant (*k* = 1.19×10-3 s-1) was calculated by fitting (Figure 6S) the processed data to the equation:

ln [**1**]/[**1**]0 = –*kt*,

where [**1**] is the concentration (mM) of **1** at *t* min and [**1**]0 is the concentration (mM) of **1** at 0 min. [**1**] is calculated from the equation:

[**1**] (mM) = 26*(obs - 120min)/0min - 120min),

where obs, 120min, and 0min denote the optical rotations at given time, 120 min (-0.647°), and 0 min (-0.257°), respectively.

**Methyl** **-D-galactopyranosyl-(1→3)-2,4-*N*-carbonyl-2,4-diamino-2,4-dideoxy-****-D-**

**xylopyranosyl-(1→2)-****-D-mannopyranoside (5)**.

To a stirred solution of Methyl -D-galactopyranosyl-(1**→**3)- 2,4-diamino-2,4-dideoxy--D-

xylopyranosyl-(1**→**2)--D-mannopyranoside (**2**; 15.4 mg, 31.7 mol) in DMF (2 mL) was added a solution of 1,1’-carbonyldiimidazole (6.2 mg, 38.2 mol) in DMF (1 mL). After 28 h at room temperature, the reaction was incomplete. Thus the bath temperature was raised to 120°C and the reaction was continued for further 24 h. The solution was concentrated and the residue was dissolved in H2O, which was passed through the column of Dowex 50 (H+) ( 1.5 x 5.0 cm) to remove imidazole. The elute was further purified by silica gel chromatography (60N, AcOEt-MeOH-H2O, 12 : 3 : 1 **→** 6 : 3 : 1) to give **3** (5.8 mg, 36 %) as a foam: *R*f 0.20 (AcOEt-MeOH-H2O, 6 : 3 : 1), **[****]D23**–46.5°(*c* 0.46 in H2O); 1H NMR (400 MHz, D2O, 303K)  5.046 (s, 1H, H-1’), 5.011 (d, 1H, *J*1,2 = 1.4 Hz, H-1), 4.711 (d, 1H, *J*1”,2” = 7.6 Hz, H-1”), 4.472-4.516 (m, 2H, H-3’, 5’a), 4.138 (dd, 1H, *J*2,3 = 3.7 Hz, H-2), 4.045 (dd, 1H, *J*3”,4”= 3.4 Hz, *J*4”,5” = 0.6 Hz, H-4”), 4.014 (dd, 1H, *J*5,6a = 2.1 Hz, *J*6a,6b = 12.2 Hz, H-6a), 3.962 (dd, 1H, *J*3,4 = 9.5 Hz, H-3), 3.906 (dd, 1H, *J*5,6b = 5.8 Hz, H-6b), 3.724-3.875 (m, 7H, H-4, 2’, 4’, 3”, 5”, 6”a, 6”b), 3.692 (dd, 1H, *J*2”,3” = 9.9 Hz, H-2”), 3.635 (bd, 1H, *J*5’a,5’b = 11.6 Hz, H-5’b), 3.527 (s, 3H, OMe) ; 13C NMR (67.8 MHz, D2O, 303K)  159.49 (C=O), 103.49 (C-1”), 98.78 (C-1’), 98.16 (C-1), 76.02, 73.16, 67.64 (C-4, 5, 3”, 5”), 75.24 (C-2), 71.55 (C-2”), 70.79 (C-3’), 70.51 (C-3), 69.12 (C-4”), 61.48 (C-6”), 61.36 (C-6), 60.92 (C-5”), 55.51 (OMe), 48.05 (C-2’, 4’). HRMS calcd. for [C19H32N2O14 +H]+ 513.1932, found:　513.1931. Anal. calcd. for C19H32N2O14: C 44.53, H 6.29, N 5.47; found: C 40.57, H 6.62, N 5.62. 1H NMR, 13C NMR, DEPT135°, COSY, HMQC, HMBC, and NOESY are shown in Figure S7-13.

**Dichloro [methyl 2,4-diamino-2,4-dideoxy-****-D-xylopyranoside-*N, N’*] platinum (4).**

To a stirred solution of compound **1** (7.9 mg, 48.7 mol) in H2O (1 mL) was added K2[PtCl4] (24.3 mg, 58.5 mol) at 25 °C. After 24 h, the solution was passed through the column of Sephadex G-10 ( 1.5 x 100 cm) to give **4** (9.7 mg, 46%) as a pale yellow solid: *R*f 0.20 (*i*PrOH-H2O-NH4OH, 20 : 3 : 1), mp 273 °C (decomp), **[****]D24**–53.7°(*c* 0.62 in H2O); 1H NMR (400 MHz, D2O, 298K)  4.849 (br, 1H, 0.9 Hz, H-1), 4.303 (dd, 1H, *J*4,5a = 2.1 Hz, *J*5a,5b = 13.7 Hz, H-5a), 3.718-3.760 (br, 2H, H-3, 5b), 3.496 (s, 3H, OMe), 2.714-2.719 (br, 1H, H-2), 2.678-2.683 (br, 1H, H-4) ; 13C NMR (67.8 MHz, D2O, 298K)  98.56　(C-1), 66.73 (C-3), 56.20 (C-5), 56.02 (OMe), 49.89 (C-4), 48.53 (C-2). HRMS calcd. for [C6H1435Cl2N2O3195Pt +K]+ 465.9666, found 465.9687. Anal. calcd. for C6H14Cl2N2O3Pt･1/2H2O : C 16.48, H 3.46, N 6.41, Cl 16.22; found: C 16.53, H 3.76, N 6.24, Cl 16.25. 1H NMR, 13C NMR, COSY, HMQC, and simulated and observed ESI mass spectra are shown in Figure S14-18.

**Time course for the complex formation of 1 with Pt (II).**

The optical rotation ) at 0 min was observed for the solution (26 mM) of **1** (8.4 mg, 51.8 mol) in 50 mM NaOAc-*d*3 D2O buffer (pH 7.0, 2.0 mL). The aliquot (600 L) was transferred to NMR tube to measure 1H NMR at 0 h (30°C).

Separately from the above samples, to the solution of **1** (11.0 mg, 67.8 mol) in 50 mM NaOAc-*d*3 D2O buffer (2319.6 L) was added the solution of K2[PtCl4] (28.1 mg, 67.7 mol) in the same buffer (280.6 L; total 2600.2 L, 26 mM). The reaction at 30°C was monitored by optical rotation (2.0 mL aliquot) for 12 h at an interval of 0.5 h (Figure S19) and by 1H NMR (600.2 L aliquot) at 0.5, 1, 1.5, 2, 4, 6, 8, and 12 h (Figure S20).

The first order rate constant (*k* = 1.30×10-4　s-1) was calculated by fitting (Figure S21) the processed data from the optical rotation measurement to the equation:

ln [**1**]/[**1**]0 = –*kt*,

where [**1**] is the concentration (mM) of **1** at *t* min and [**1**]0 is the concentration (mM) of **1** at 0 min. [**1**] is calculated from the equation:

[**1**] (mM) = 26*(obs - 12h)/0h - 12h),

where obs, 12h, and 0h denote the optical rotations at given time, 12 h (-0.583°), and 0 min (-0.3020°), respectively.

The first order rate constant caluculated from 1H NMR (*k* = 1.16×10-4　s-1)was similar to that obtained above, only when the data at 6 and 8 h were omitted because of their small S/N ratios.

**Dichloro [methyl -D-galactopyranosyl-(1→3)-2,4-diamino-2,4-dideoxy--D-xylopyranosyl-**

**(1→2)--D-mannopyranoside-*N, N’*] platinum (6).**

To a stirred solution of compound **2** (30.6 mg, 62.9 mol) in 50 mM NaOAc-*d*3 D2O buffer (pH 7.0, 2157.2 L, 26 mM) was added a solution of K2[PtCl4] (26.2 mg, 63.1 mol) in the same buffer (262 L) at 30 °C. After 12 h, the solution was passed through the column of Sephadex G-15 ( 2.5 x 100 cm) to give **6** (21.9 mg, 46%) as a pale yellow solid: *R*f 0.22 (iPrOH-H2O-NH4OH, 7 : 3 : 1), mp 250 °C (decomp), **[****]D24**–59.1°(*c* 0.93 in H2O); 1H NMR (400 MHz, D2O, 303K)  5.188 (s, 1H, H-1’), 5.044 (d, 1H, *J*1,2 = 1.2 Hz, H-1), 4.664 (d, 1H, *J*1”,2” = 7.6 Hz, H-1”), 4.586 (dd, 1H, *J*4’,5’a = 1.8 Hz, *J*5’a,5’b = 12.9 Hz, H-5’a), 4.181 (dd, 1H, *J*2,3 = 3.8 Hz, H-2), 3.983-4.036 (m, 4H, H-3, 6a, 3’, 4”), 3.754-3.914 (m, 8H, H-4, 5, 6b, 5’b, 3”, 5”, 6”a, 6”b), 3.649 (dd, 1H, *J*2”,3” = 9.9 Hz, 2”), 3.549 (s, 3H, OMe), 3.637 (bd, 1H, H-2’), 3.011 (br, 1H, H-4’) ; 13C NMR (100.6 MHz, D2O, 303K)  102.24 (C-1”), 97.94 (C-1’), 95.19 (C-1), 76.17 (C-5”), 74.59 (C-2), 73.21, 73.11 (C-5, 3”), 72.71 (C-3’), 71.42 (C-2”), 70.46 (C-3), 69.21 (C-4”), 67.43 (C-4), 61.74 (C-6”), 61.35 (C-6), 57.11 (C-5’), 55.58 (OMe), 47.56, 47.52 (C-2’, C-4’). HRMS calcd. for [C18H3435Cl2 N2O13195Pt +K]+ 790.0723, found　790.0681. Anal. calcd. forC18H34Cl2N2O13Pt･2H2O: C 27.42, H 4.86, N 3.55; found: C 27.42, H 4.74, N 3.60. 1H NMR, 13C NMR, COSY, HMQC, HMBC, NOESY, 1D NOESY and 1D TOCSY, and ESI mass spectra are shown in Figure S22-29.

**Time course for the complex formation of 2 with Pt (II).**

The optical rotation ) at 0 min was observed for the solution (26 mM) of **2** (25.3 mg, 52.0 mol) in 50 mM NaOAc-*d*3 D2O buffer (pH 7.0, 2.0 mL). To this solution, a solution of **2** (5.3 mg, 10.9 mol) in 50 mM NaOAc-*d*3 D2O buffer (157.2 L) and then a solution of K2[PtCl4] (26.2 mg, 63.1 mol) in the same buffer (262 L; total 2419.2 L, 26 mM). The reaction at 30°C was monitored by optical rotation for 12 h at an interval of 0.5 h (Figure S30).

The first order rate constant (*k* = 1.68×10-4　s-1) was calculated by fitting (Figure S31) the processed data from the optical rotation measurement to the equation:

ln [**2**]/[**2**]0 = –*kt*,

where [**2**] is the concentration (mM) of **2** at *t* min and [**2**]0 is the concentration (mM) of **2** at 0 min. [**2**] is calculated from the equation:

[**2**] (mM) = 26*(obs - 12h)/0h - 12h),

where obs, 12h, and 0h denote the optical rotations at given time.

**Complex formation of (1,3/2,4,6)-4,6-diamino-1,2,3-cyclohexanetetrol (2-deoxystreptamine) with Pt (II).**

1H NMR at 0 h (30°C) was observed for the solution (26 mM) of 2-deoxystreptamine (2.5 mg, 15.6 mol) in 50 mM NaOAc-*d*3 D2O buffer (pH 7.0, 500 L). To this solution, a solution of K2[PtCl4] (6.5 mg, 15.6 mol) in 50 mM NaOAc-*d*3 D2O buffer (100 L) was added and the reaction at 30°C was monitored by 1H NMR at 2, 8, and 24 h (Figure S32). There were significant changes in the chemical shifts at 2 h and more than one isomer appeared at 24 h. However none of the signals supported a flipped 6-membered ring, which would show signals with much smaller coupling constants.

**Unchelation of Pt (II) complex 4 with thiourea.**

The complex **4**, prepared from **1** (8.4 mg, 51.8 mol) and K2[PtCl4] (21.5 mg, 51.8 mol) in 50 mM NaOAc-*d*3 D2O buffer (2000 L, 30°C, 24 h), was used without purification. The reaction was started by adding a solution of Na2CO3 (6.2 mg, 58.5 mol) in the same buffer (100 L) and then a solution of thiourea (17.6 mg, 231.2 mol) in the buffer (100 L). After 24 h at 30 °C, the solution was concentrated and chromatographed on a column of silica gel (60N, *i*PrOH- H2O-NH4OH, 35 : 3 : 1) and on a column of Dowex 50 (H+) ( 1.5 x 5.0 cm; gradient elution with 0 to 2 mM NH3) to give **1** (6.7 mg, 80 %)

**Unchelation of Pt (II) complex 4 with NaCN.**

The complex **4**, prepared from **1** (11.0 mg, 67.8 mol) and K2[PtCl4] (28.2 mg, 67.9 mol) in 50 mM NaOAc-*d*3 D2O buffer (2600 L, 30°C, 24 h), was used without purification. The reaction was started by adding a solution of **4** (1.1 mg, 67.8 mol) in the same buffer (55 L) to keep the concentration constant and then a solution of NaCN (13.7 mg, 279.5 mol) in the buffer (45 L). The reaction was monitored by 1H NMR at 0, 10, 20, and 120 min (Figure S33). The solution was concentrated and chromatographed on a column of silica gel (60N, *i*PrOH- H2O-NH4OH, 35 : 3 : 1) and on a column of Dowex 50 (H+) ( 1.5 x 5.0 cm; gradient elution with 0 to 2 mM NH3) to give **1** (8.4 mg, 74 %)

**Diiodo [methyl 2,4-diamino-2,4-dideoxy-****-D-xylopyranoside-*N, N’*] platinum (7).**

The complex **4**, prepared from **1** (8.3 mg, 51.1 mol) and K2[PtCl4] (21.5 mg, 51.8 mol) in 50 mM NaOAc-*d*3 D2O buffer (2.0 mL, 30°C, 24 h), was used without purification. The reaction was started by adding a solution of KI (18.7 mg, 112.7 mol) in the buffer (200 L). After 12 h, the solution was passed through the column of Sephadex G-10 ( 1.5 x 100 cm) to give **7** (11.0 mg, 35 %) as a pale yellow solid: mp 225 °C (decomp) **[****]D26**–35.2°(*c* 0.55 in H2O); 1H NMR (400 MHz, D2O, 303K)  4.903 (br, 1H, Hz, H-1), 4.320 (dd, 1H, *J*4,5a = 2.2 Hz, *J*5a,5b = 13.3 Hz, H-5a), 3.855 (br, 1H, H-3). 3.787 (br, 1H, 5b), 3.541 (s, 3H, OMe), 2.956 (br, 1H, H-2), 2.917 (br, 1H, H-4); 13C NMR (67.8 MHz, D2O, 303K)  98.79　(C-1), 65.93 (C-3), 56.36 (C-5), 55.96 (OMe), 50.32 (C-2), 49.15 (C-4). HRMS calcd. for [C6H14I2N2O3195Pt +K]+ 611.8820, found 611.8824. Anal. calcd. for C6H14I2N2O3Pt : C 11.79, H 2.31, N 4.58; found: C 12.22, H 2.81, N 4.05. 1H NMR, COSY, HMQC, and ESI mass spectra are shown in Figure S34-37.

**Dithiocyanato [methyl 2,4-diamino-2,4-dideoxy-****-D-xylopyranoside-*N, N’*] platinum (8).**

The complex **4**, prepared from **1** (8.3 mg, 51.1 mol) and K2[PtCl4] (21.5 mg, 51.8 mol) in 50 mM NaOAc-*d*3 D2O buffer (2.0 mL, 30 °C, 24 h), was used without purification. The reaction was started by adding a solution of KSCN (10.9 mg, 112.2 mol) in the buffer (200 L). The complex **8** was unable to purify by column of Sephadex G-10;1H NMR (400 MHz, D2O)  4.909 (bs, 1H, Hz, H-1), 4.372 (dd, 1H, *J*4,5a = 2.1 Hz, *J*5a,5b = 13.4 Hz, H-5a), 3.927 (br, 1H, H-3). 3.796 (br, 1H, 5b), 3.557 (s, 3H, OMe), 3.169 (br, 1H, H-2), 3.128 (br, 1H, H-4); 13C NMR (100.6 MHz, D2O, 303K)  120.81 (SCN), 98.62　(C-1), 66.56 (C-3), 56.14, 56.09 (C-5, OMe), 50.42 (C-2), 49.26 (C-4). HRMS calcd. for [C8H14N4O3195PtS2 +K]+ 511.9792, found 511.9792. 1H NMR, COSY, HMQC, and ESI mass spectra are shown in Figure S38-41.

**Unchelation of Pt (II) complex 6 with NaCN.**

To a solution of complex **6** (9.6 mg, 12.8 mol) in 50 mM NaOAc-*d*3 D2O buffer (pH 7, 600 L) was added , a solution of NaCN (2.6 mg, 53.1 mol) in the buffer (100 L). The reaction at 30 °C was monitored by 1H NMR at 0, 10, 20, and 120 min (Figure S42). The solution was concentrated and chromatographed on a column of silica gel (60N, *i*PrOH- H2O-NH4OH, 7 : 3 : 1) and on a column of Dowex 50 (H+) ( 1.5 x 5.0 cm; gradient elution with 0 to 2 mM NH3) to give **2** (5.0 mg, 81 %).


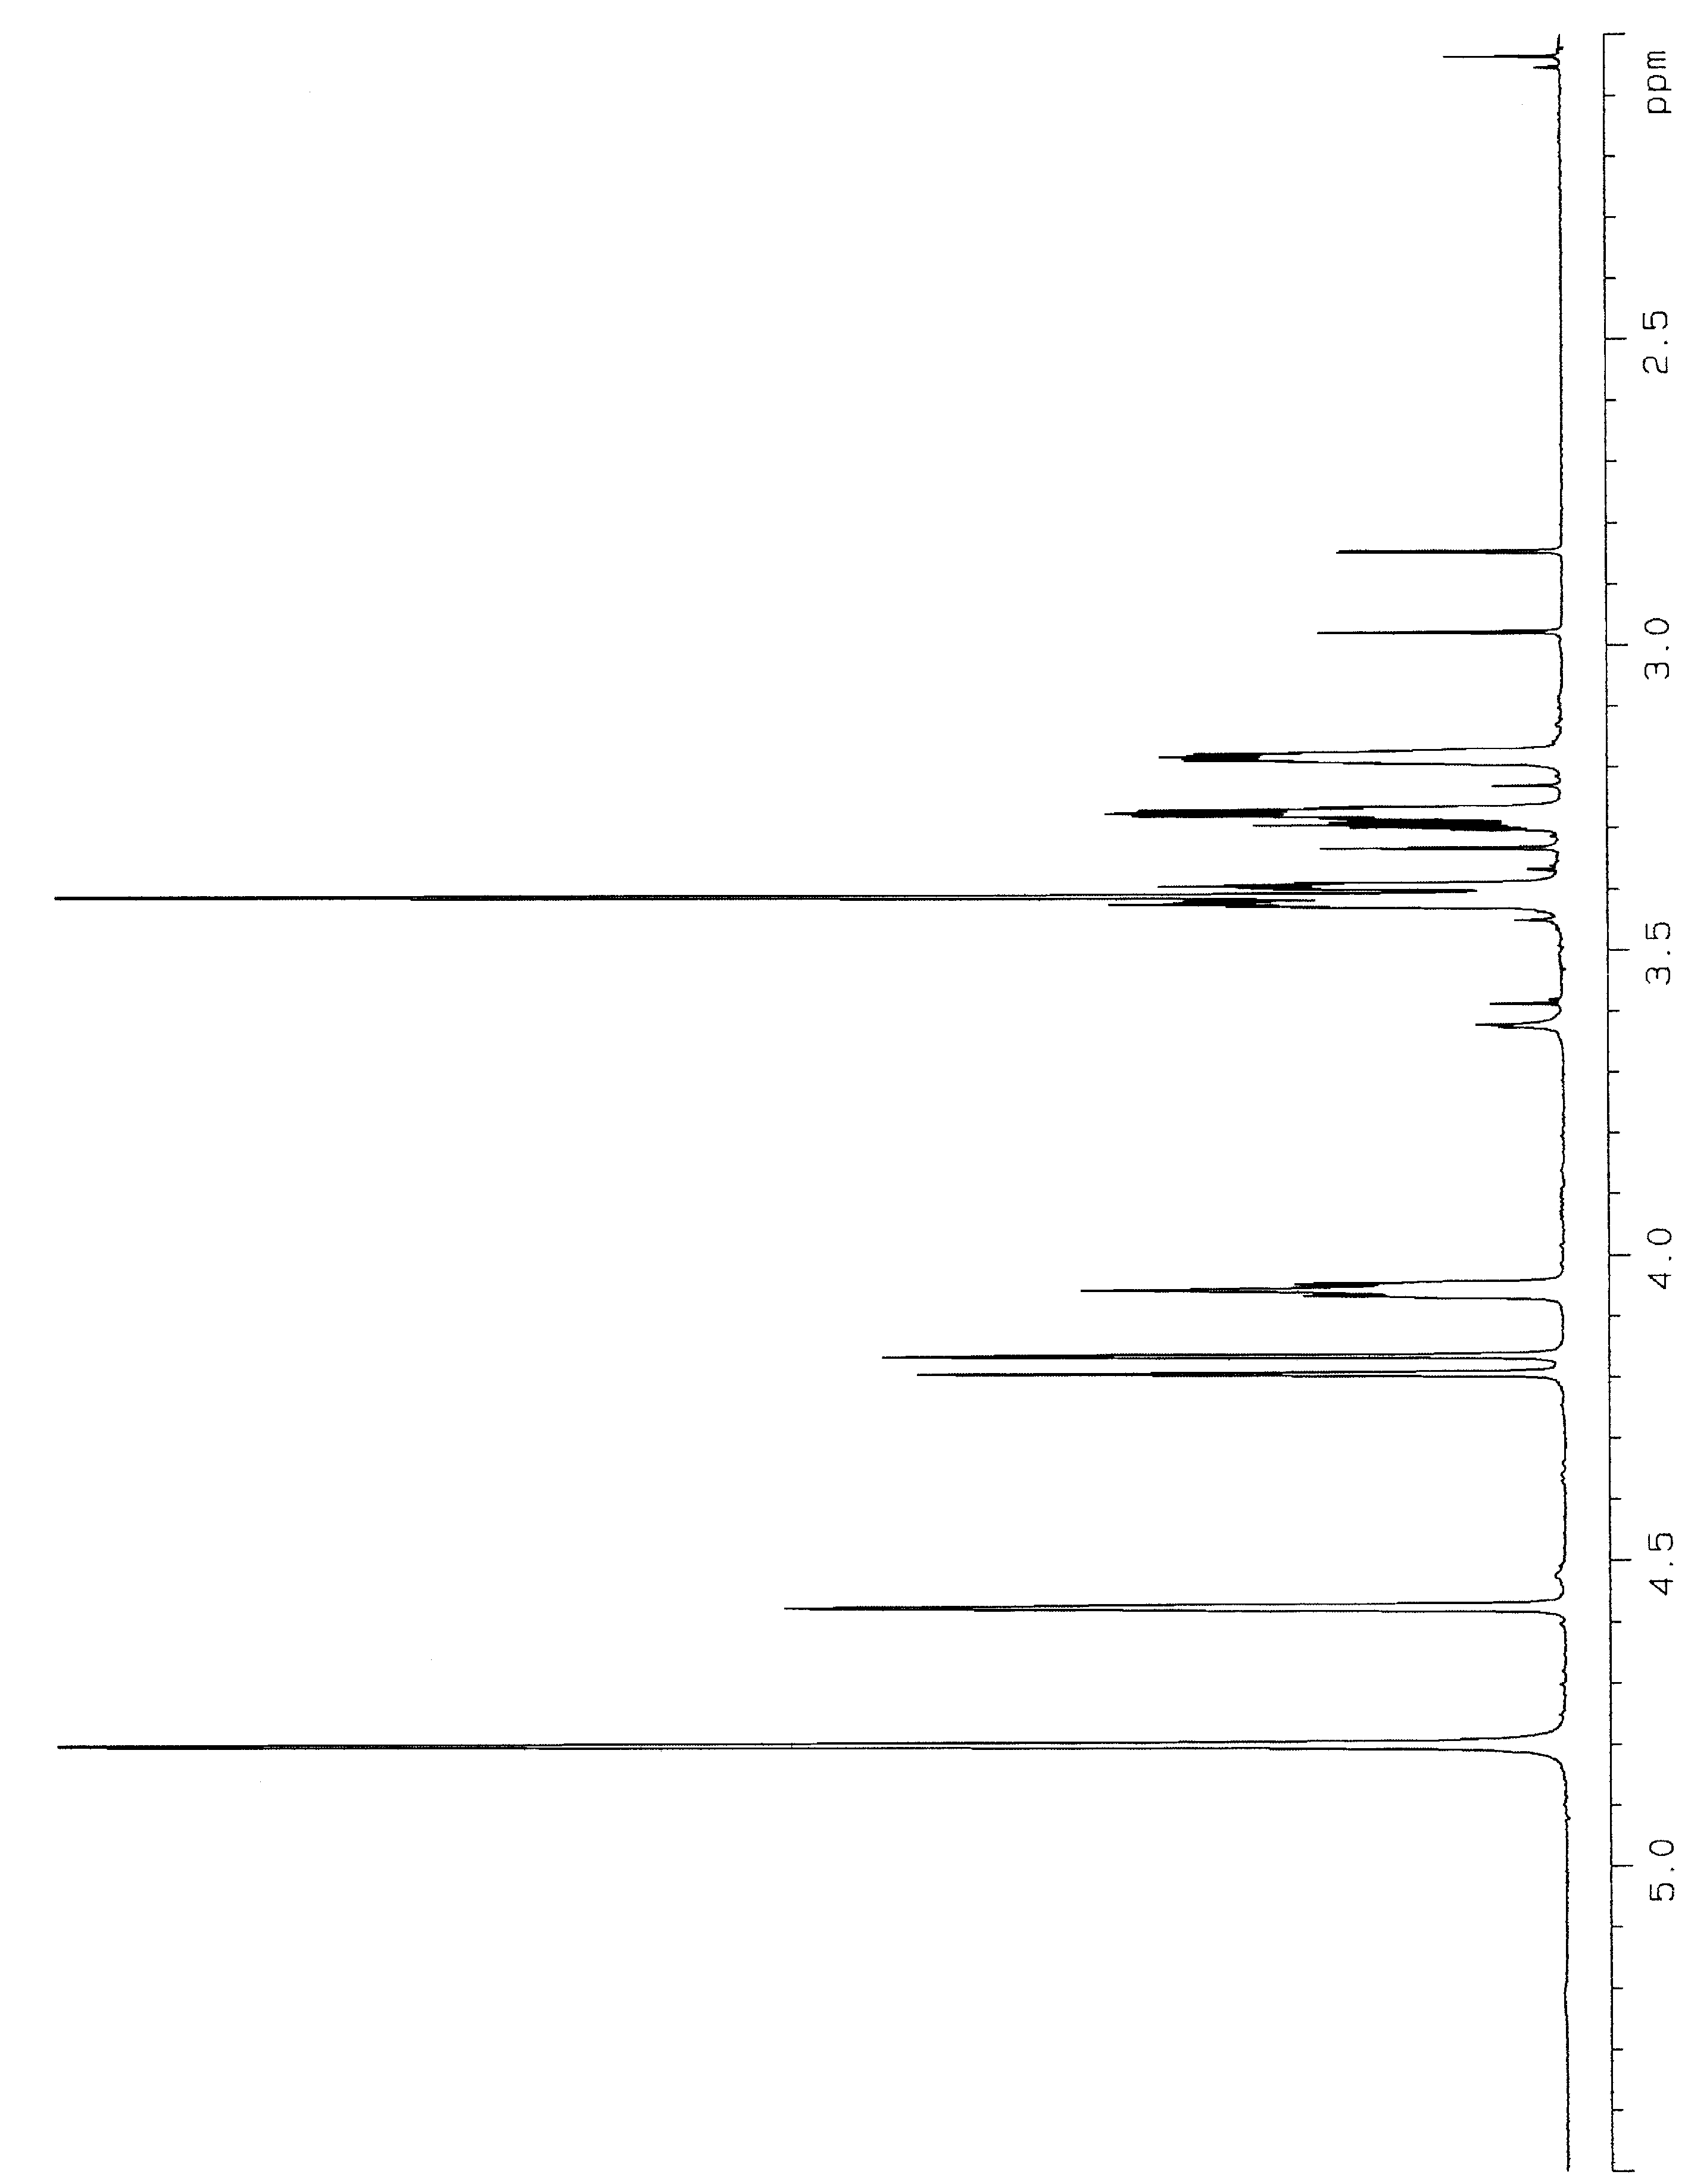


Figure S1. 1H NMR spectrum of **3** in CD3OD.


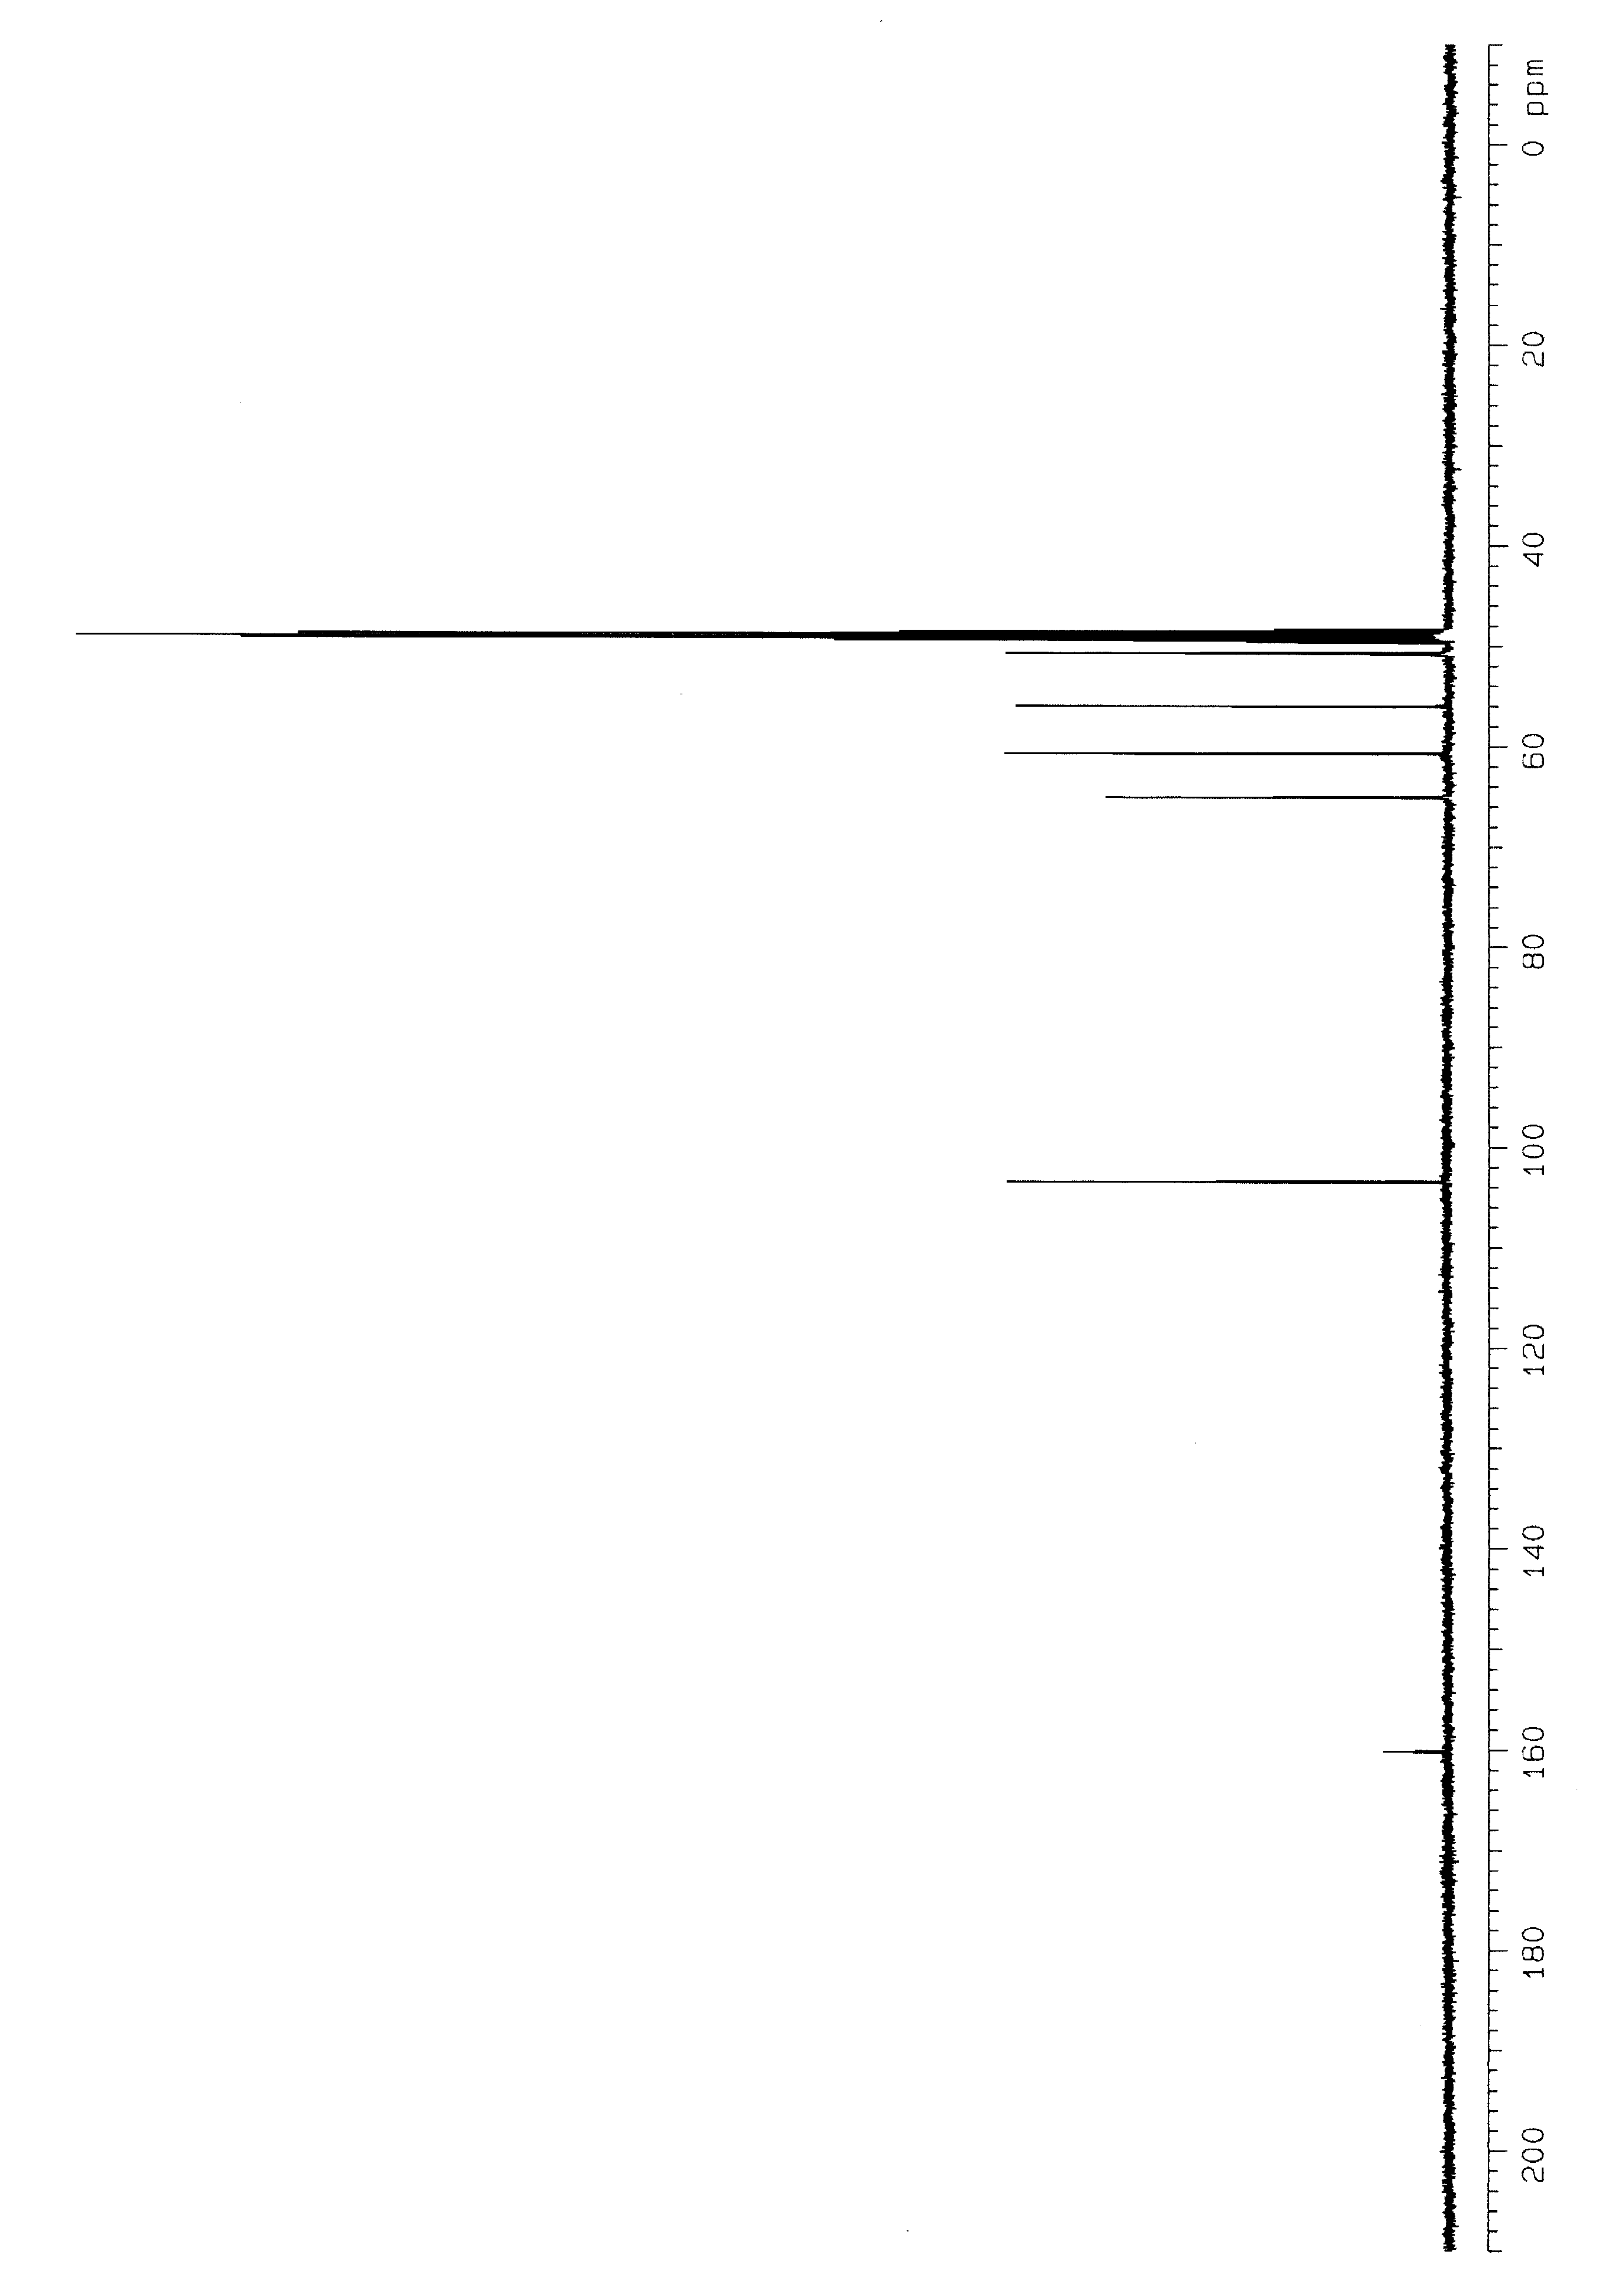


Figure S2. 13C NMR spectrum of **3** in CD3OD.


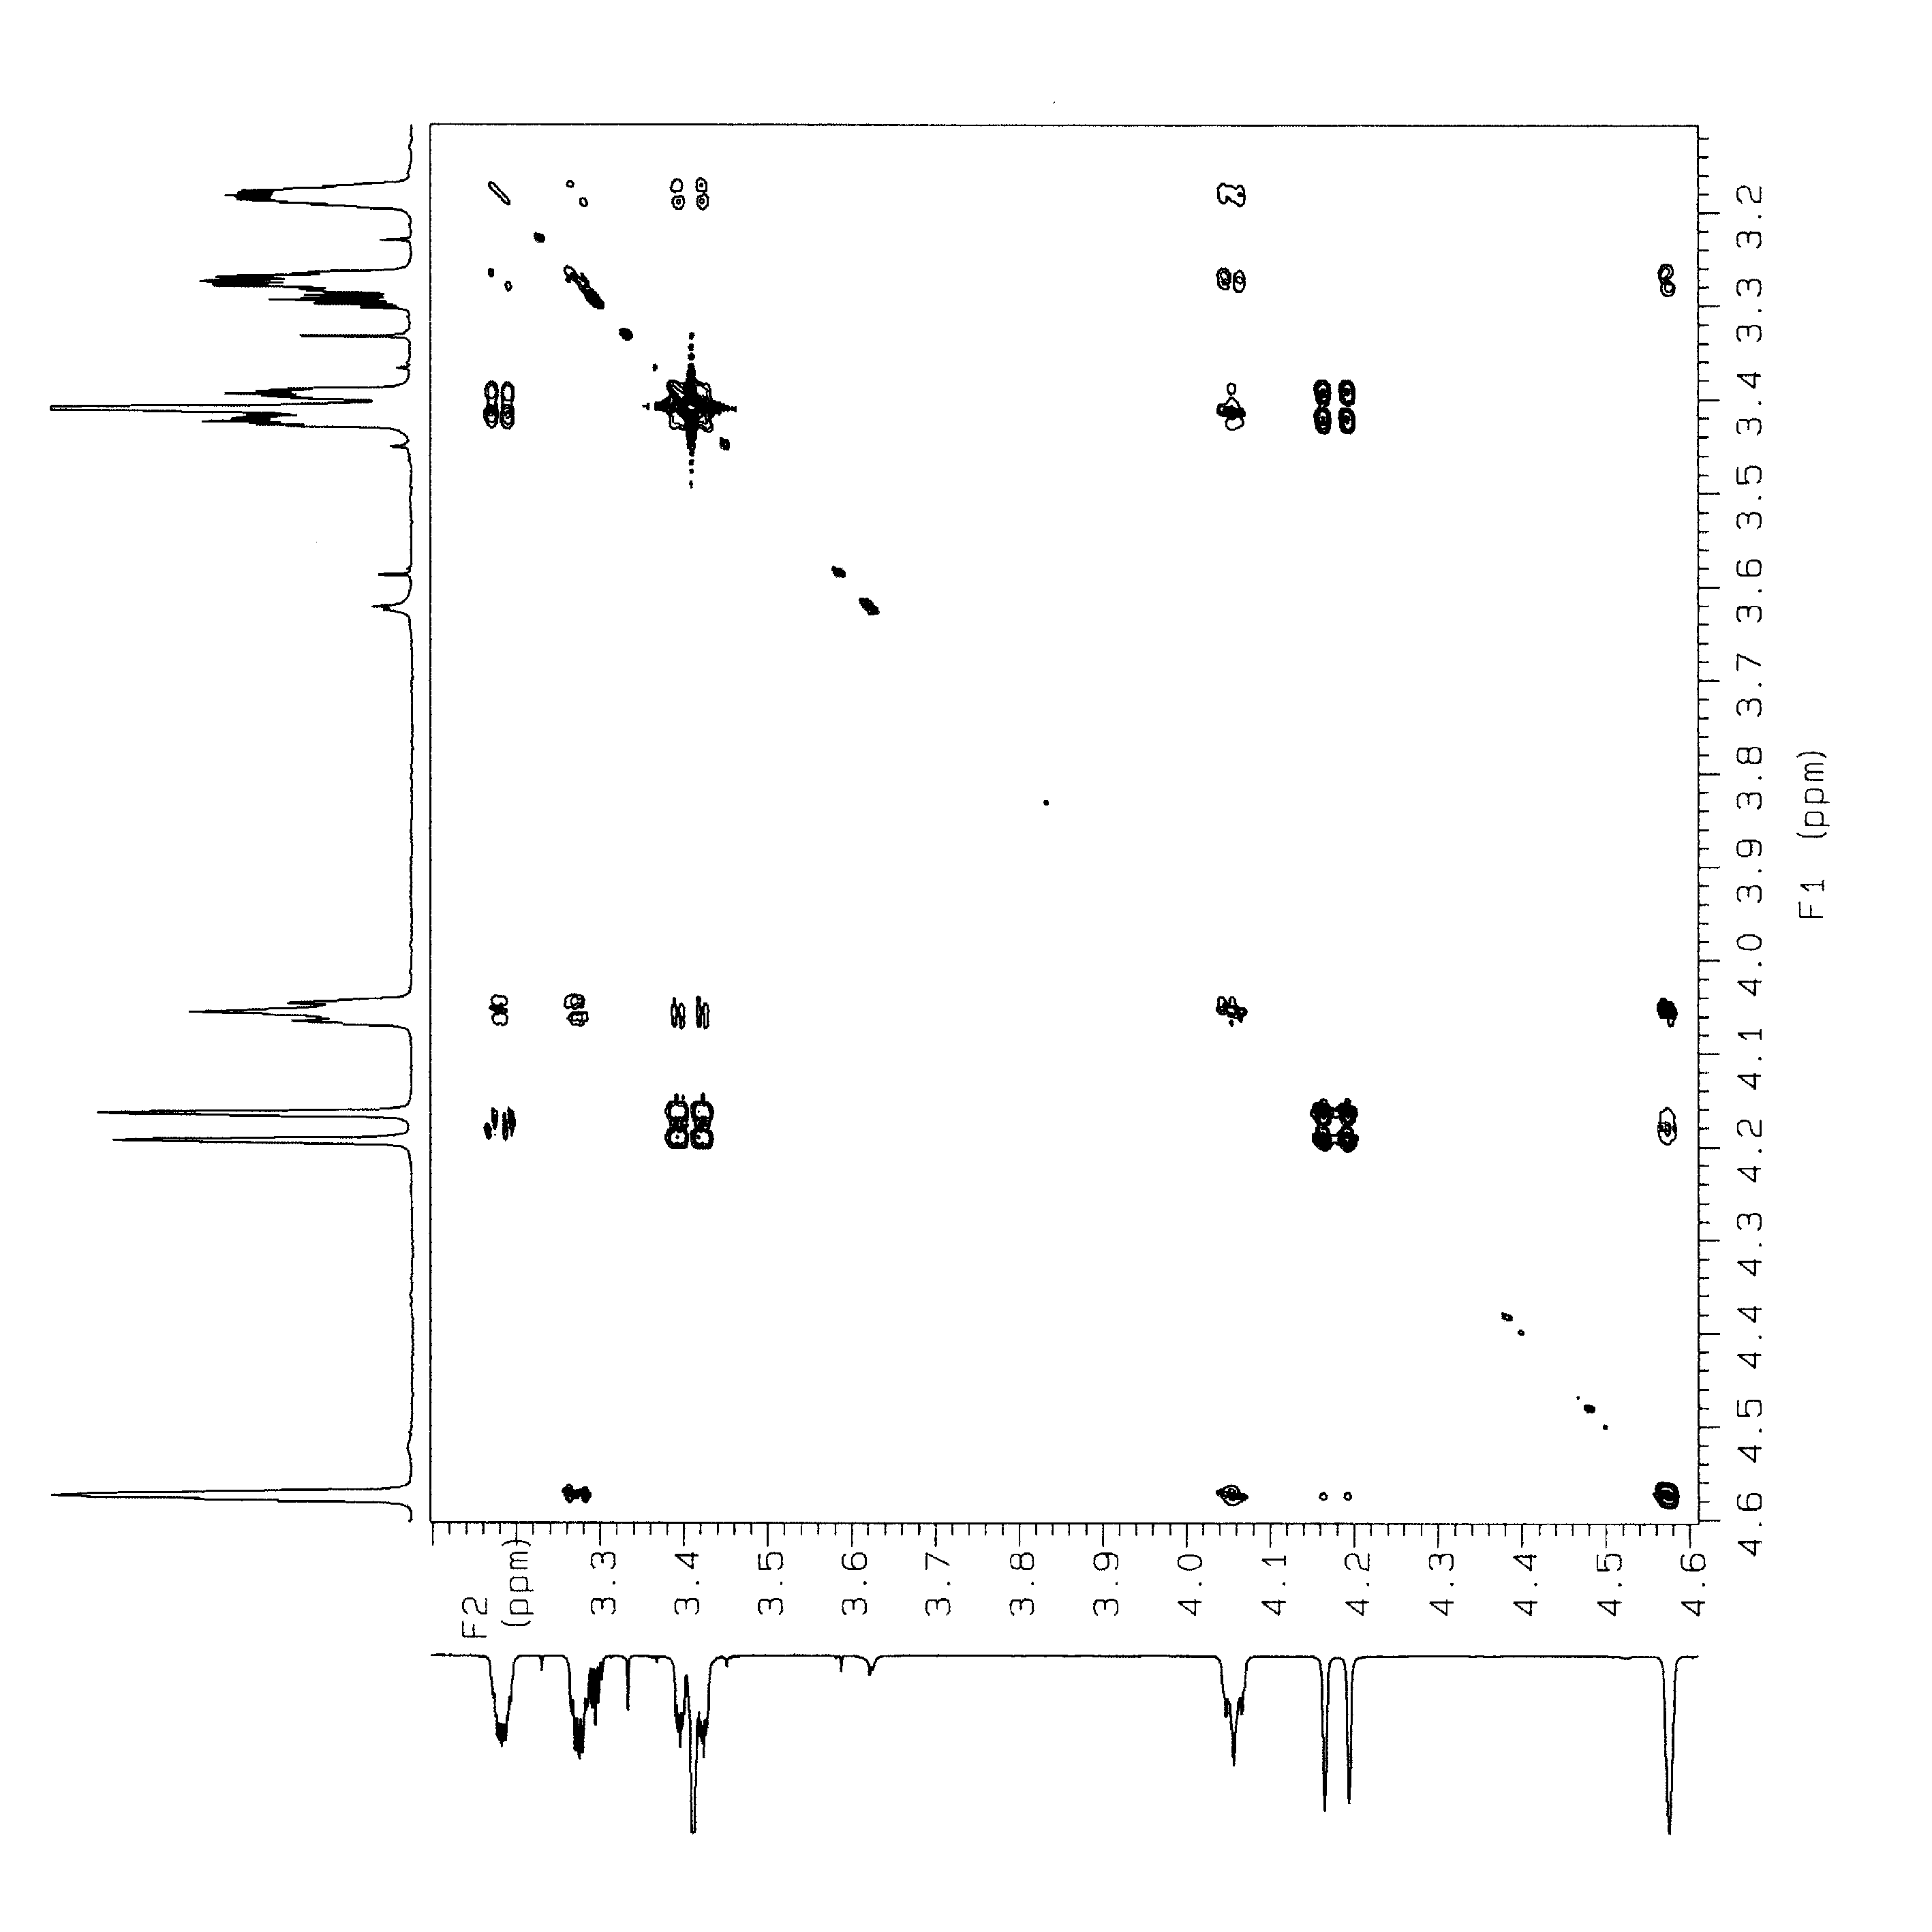


Figure S3. COSY spectrum of **3** in CD3OD.


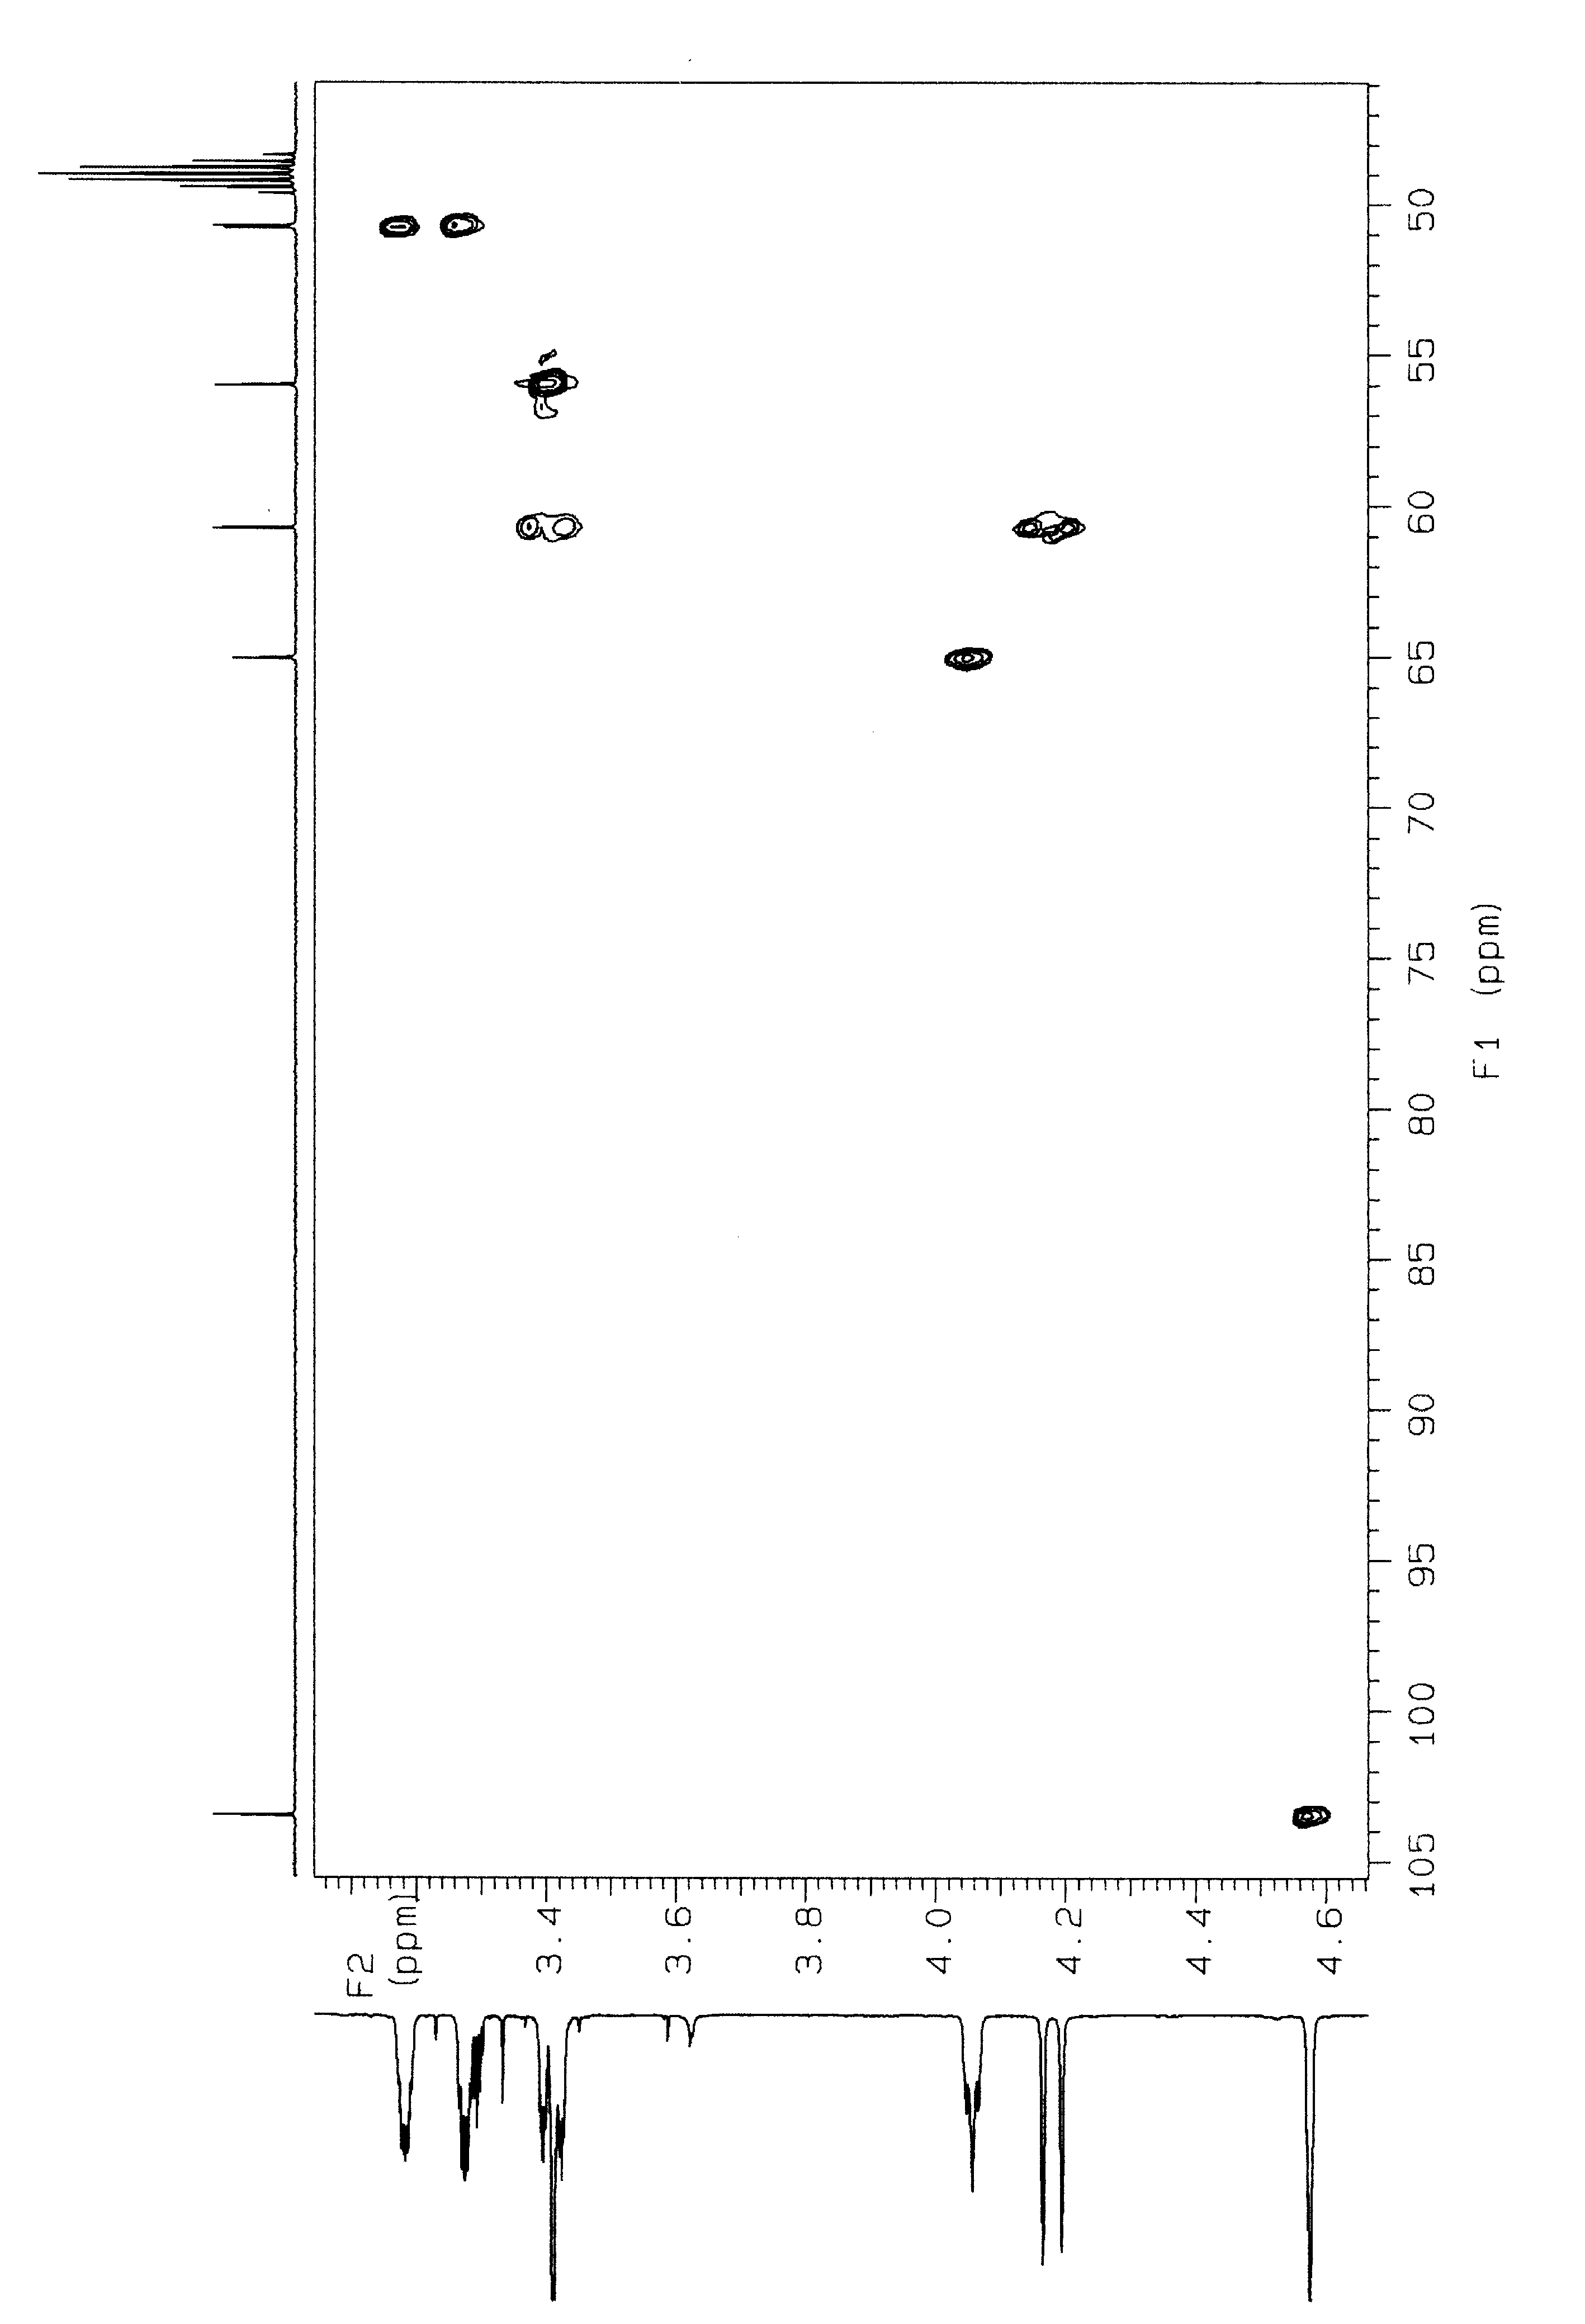


Figure S4. HMQC spectrum of **3** in CD3OD.


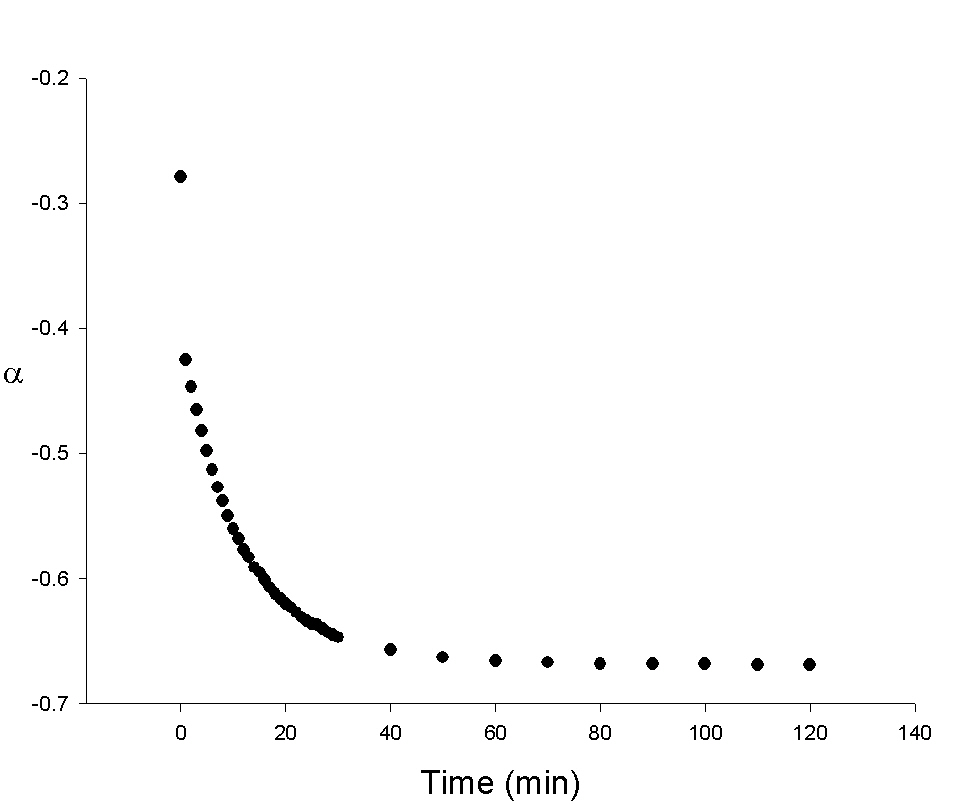


Figure S5. Time course of optical rotation () for the carbonylation of **1**.


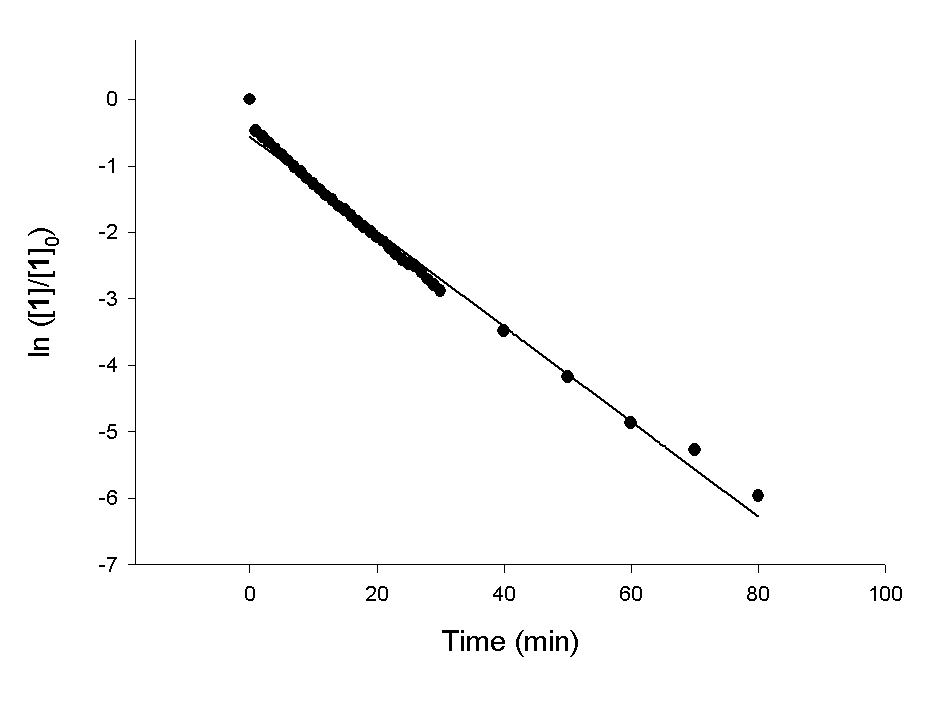


Figure S6. First-order kinetics fitting plot for the carbonylation of **1**. (ln ([**1**]/[**1**]0) = –0.0715*t* – 0.555; *r*2 = 0.9877)


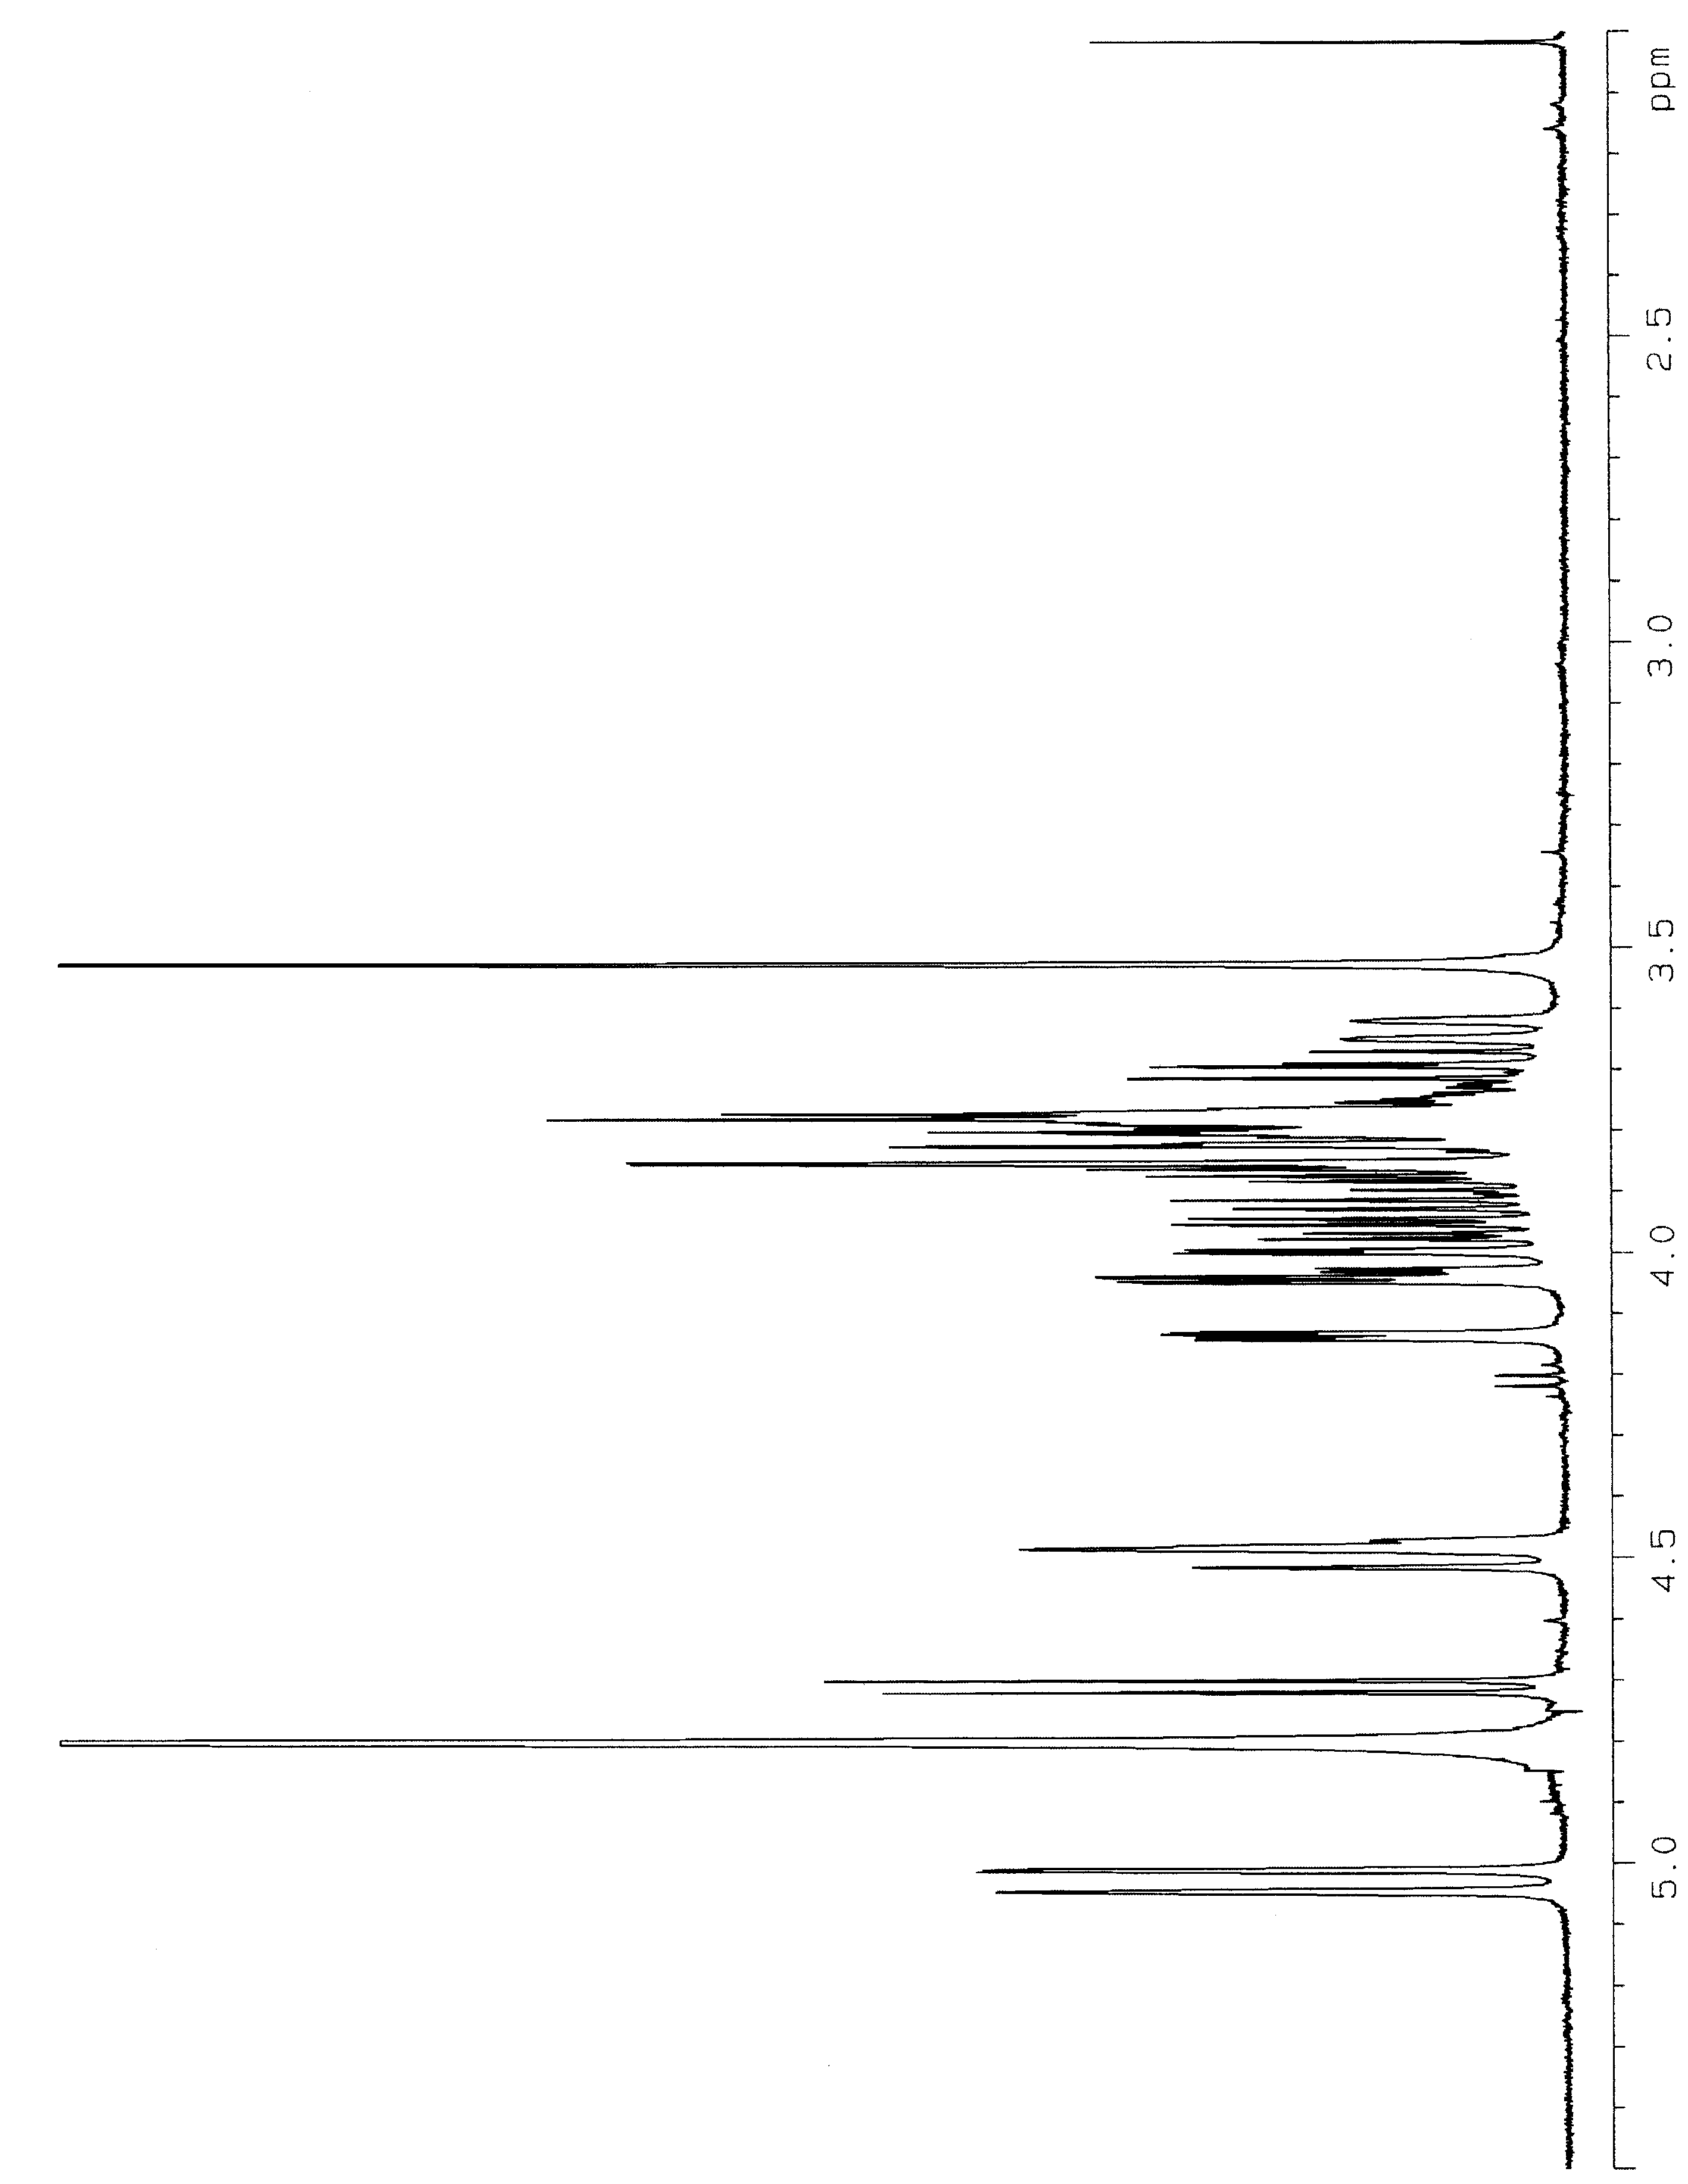


Figure S7. 1H NMR spectrum of **5** in D2O.


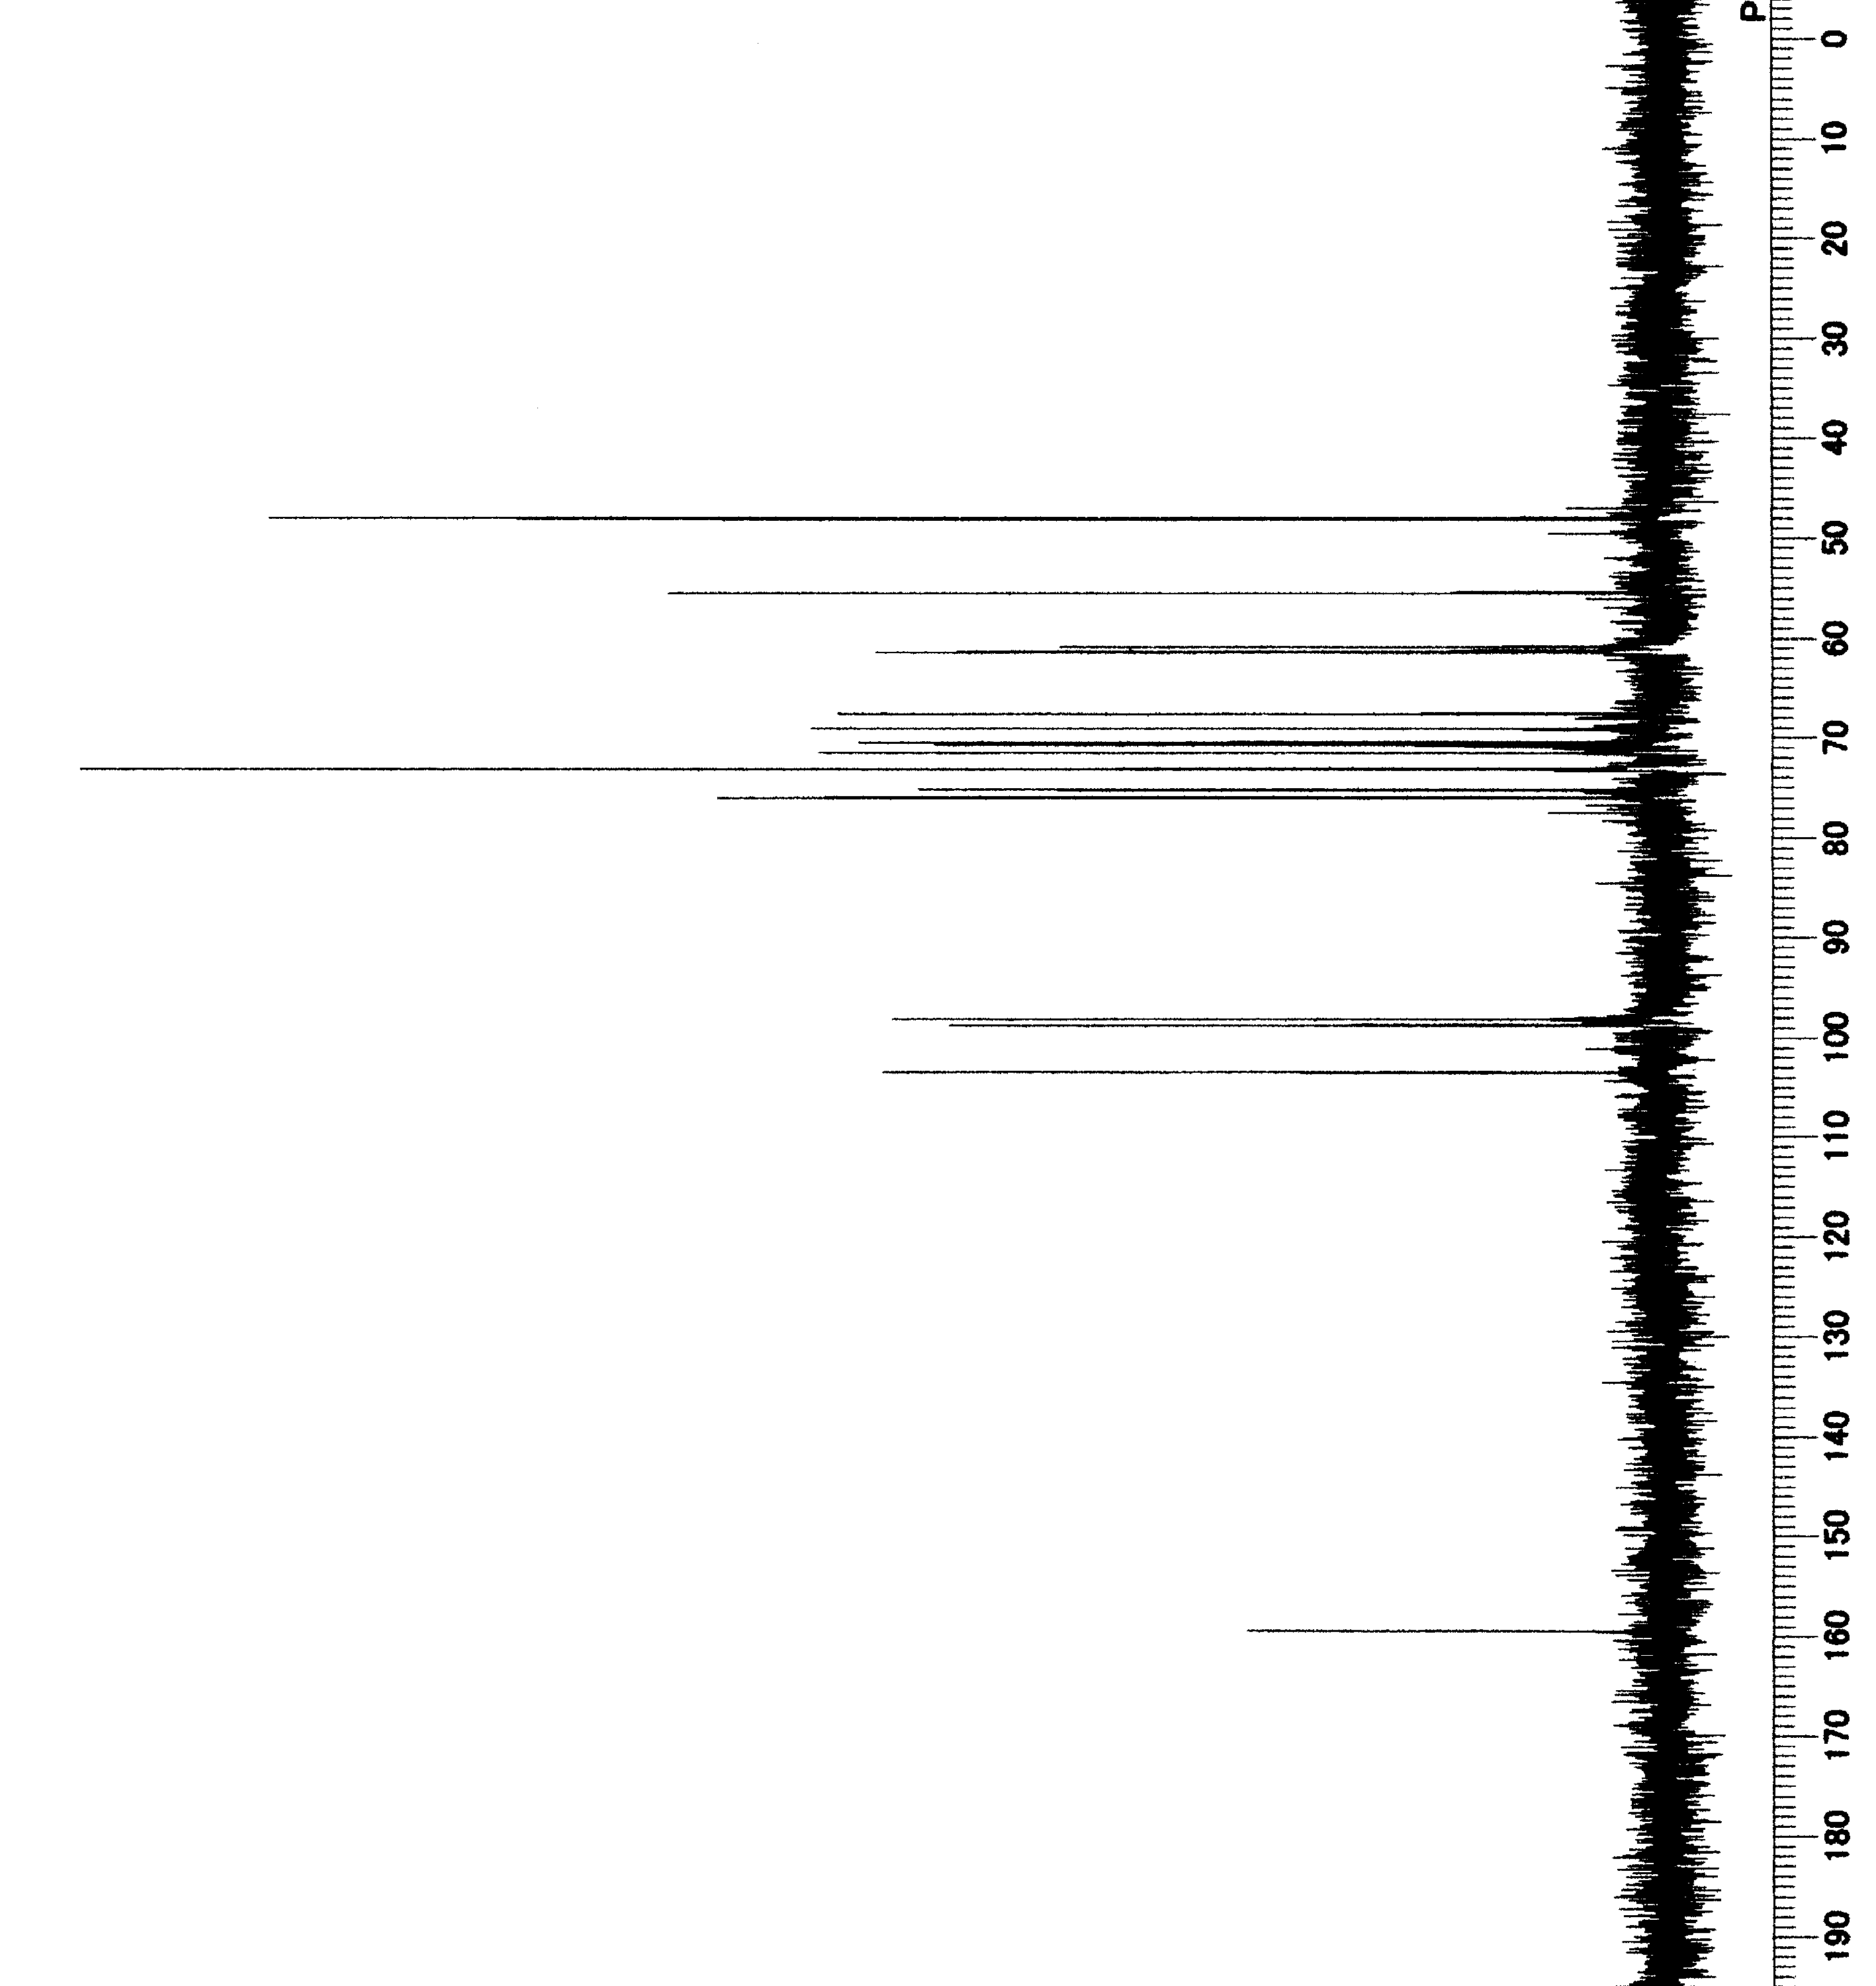


Figure S8. 13C NMR spectrum of **5** in D2O.


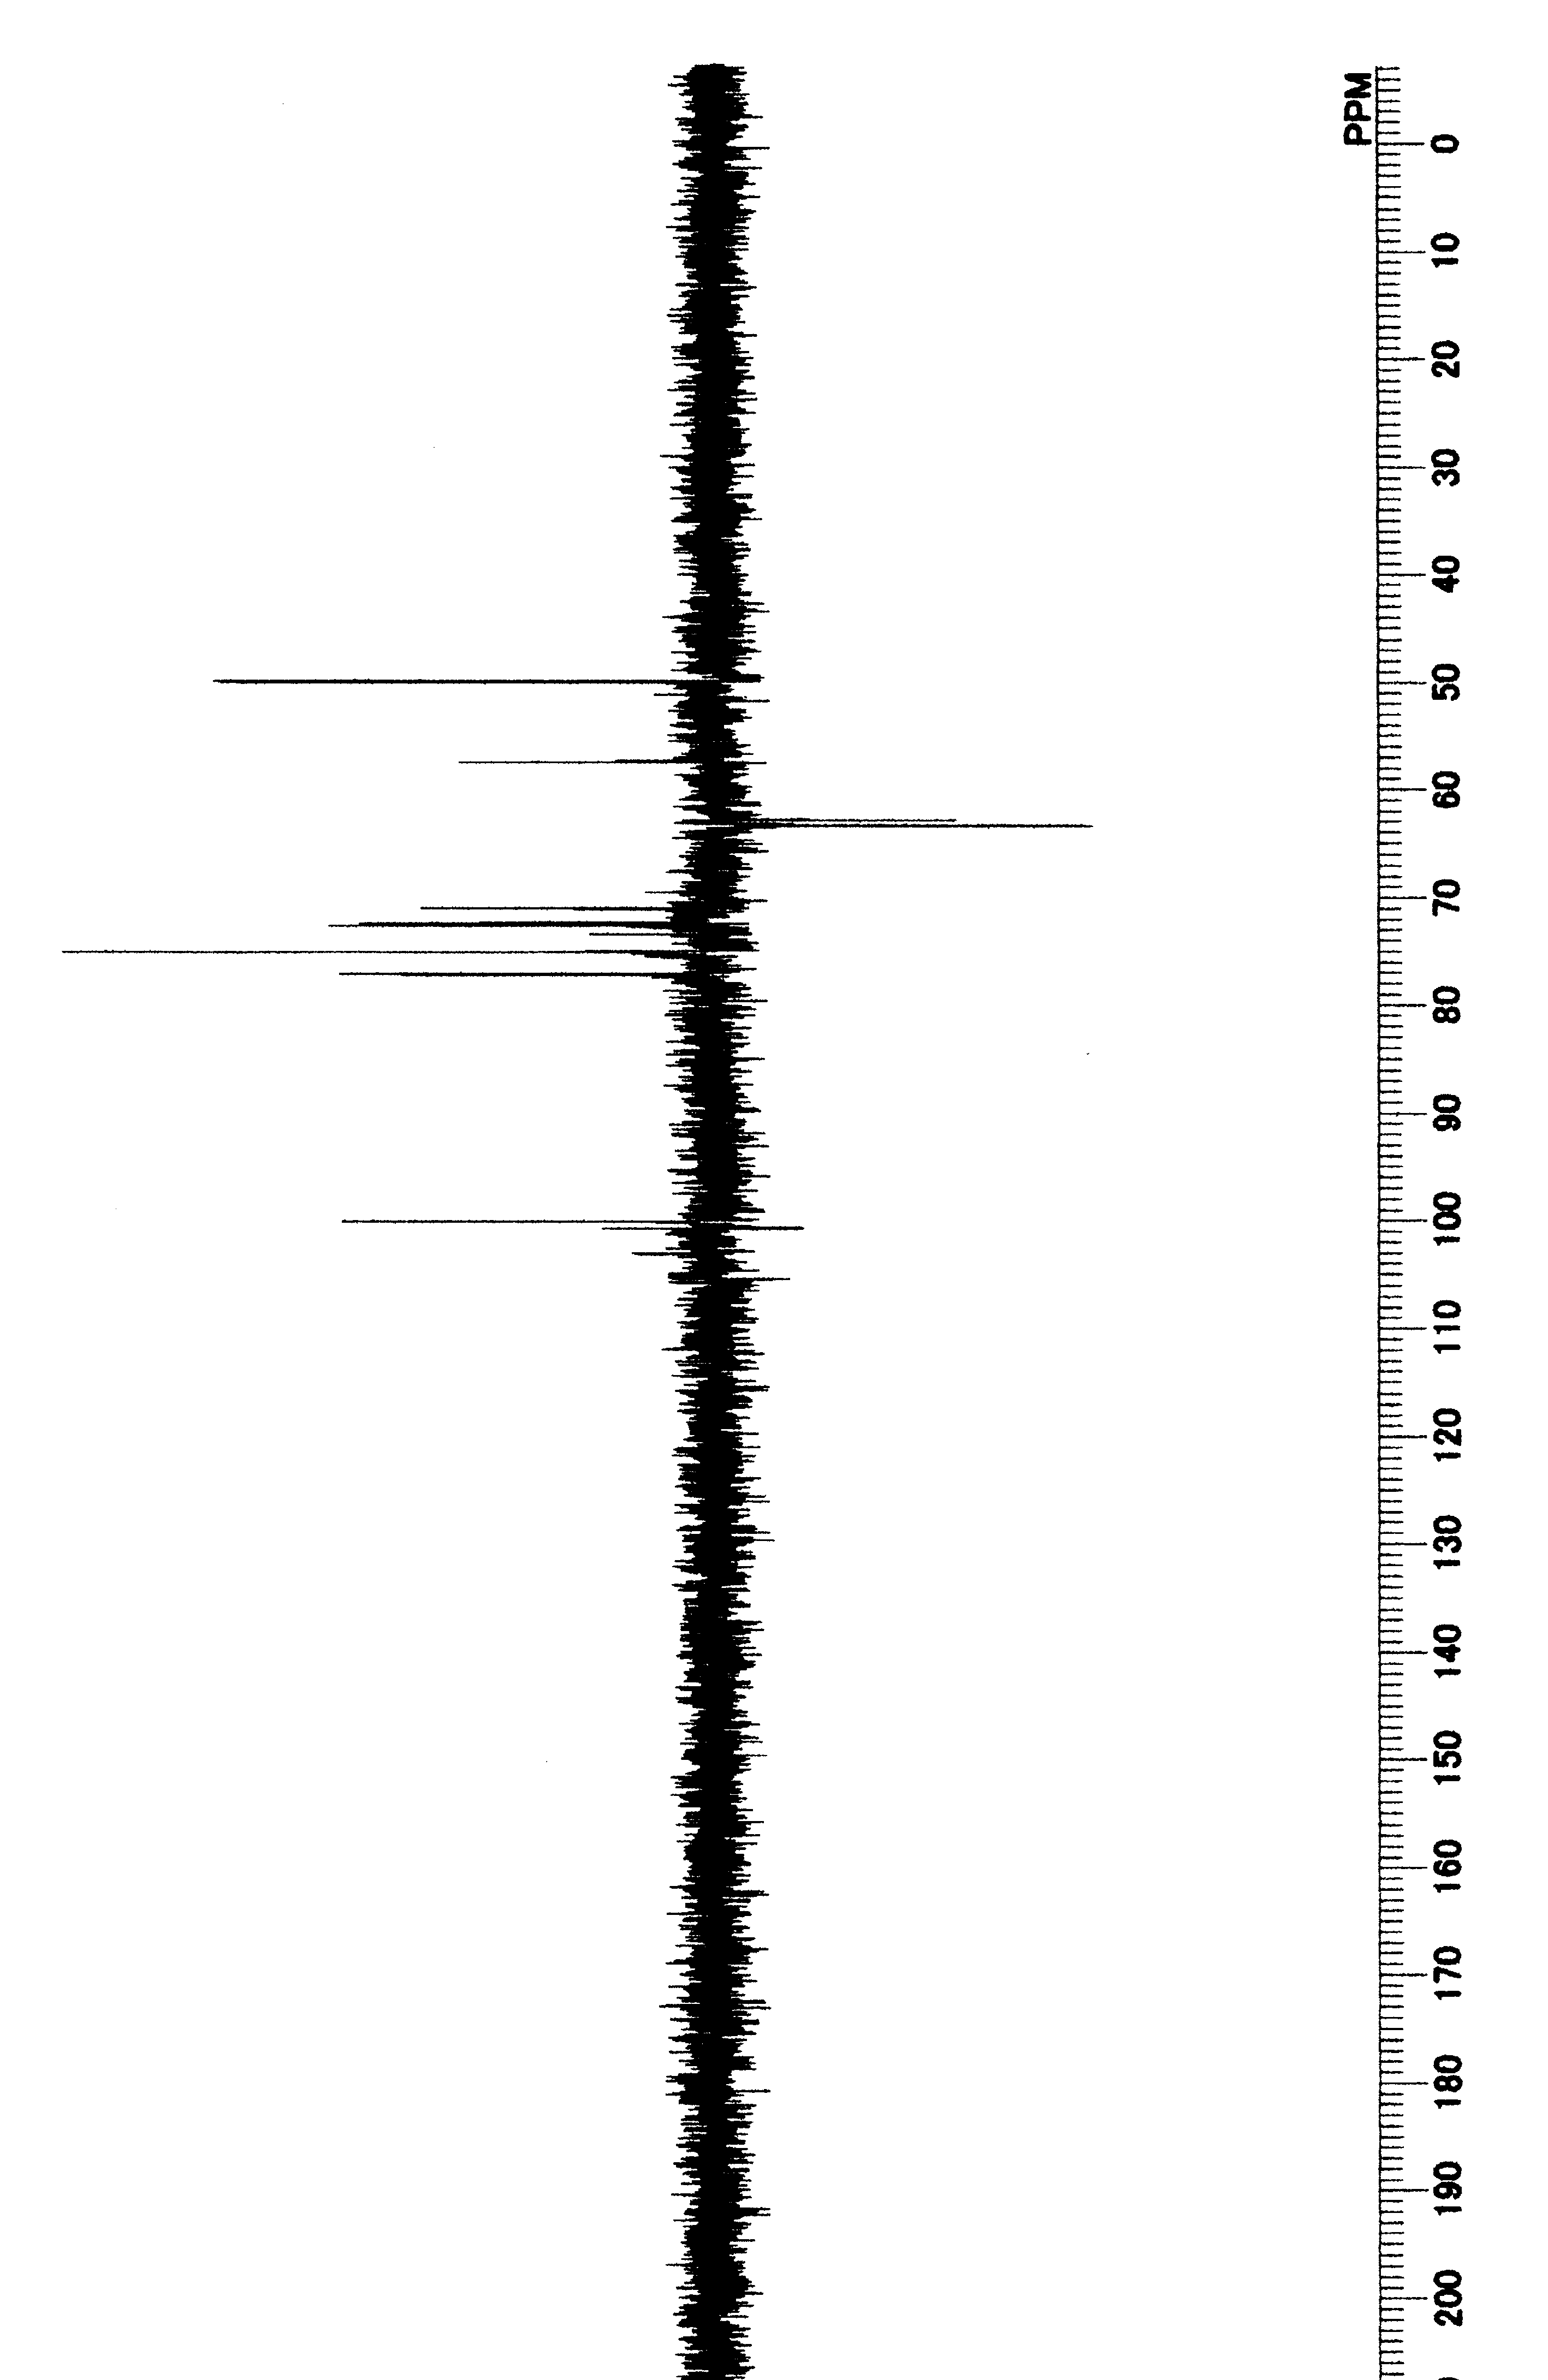


Figure S9. DEPT135° spectrum of **5** in D2O.


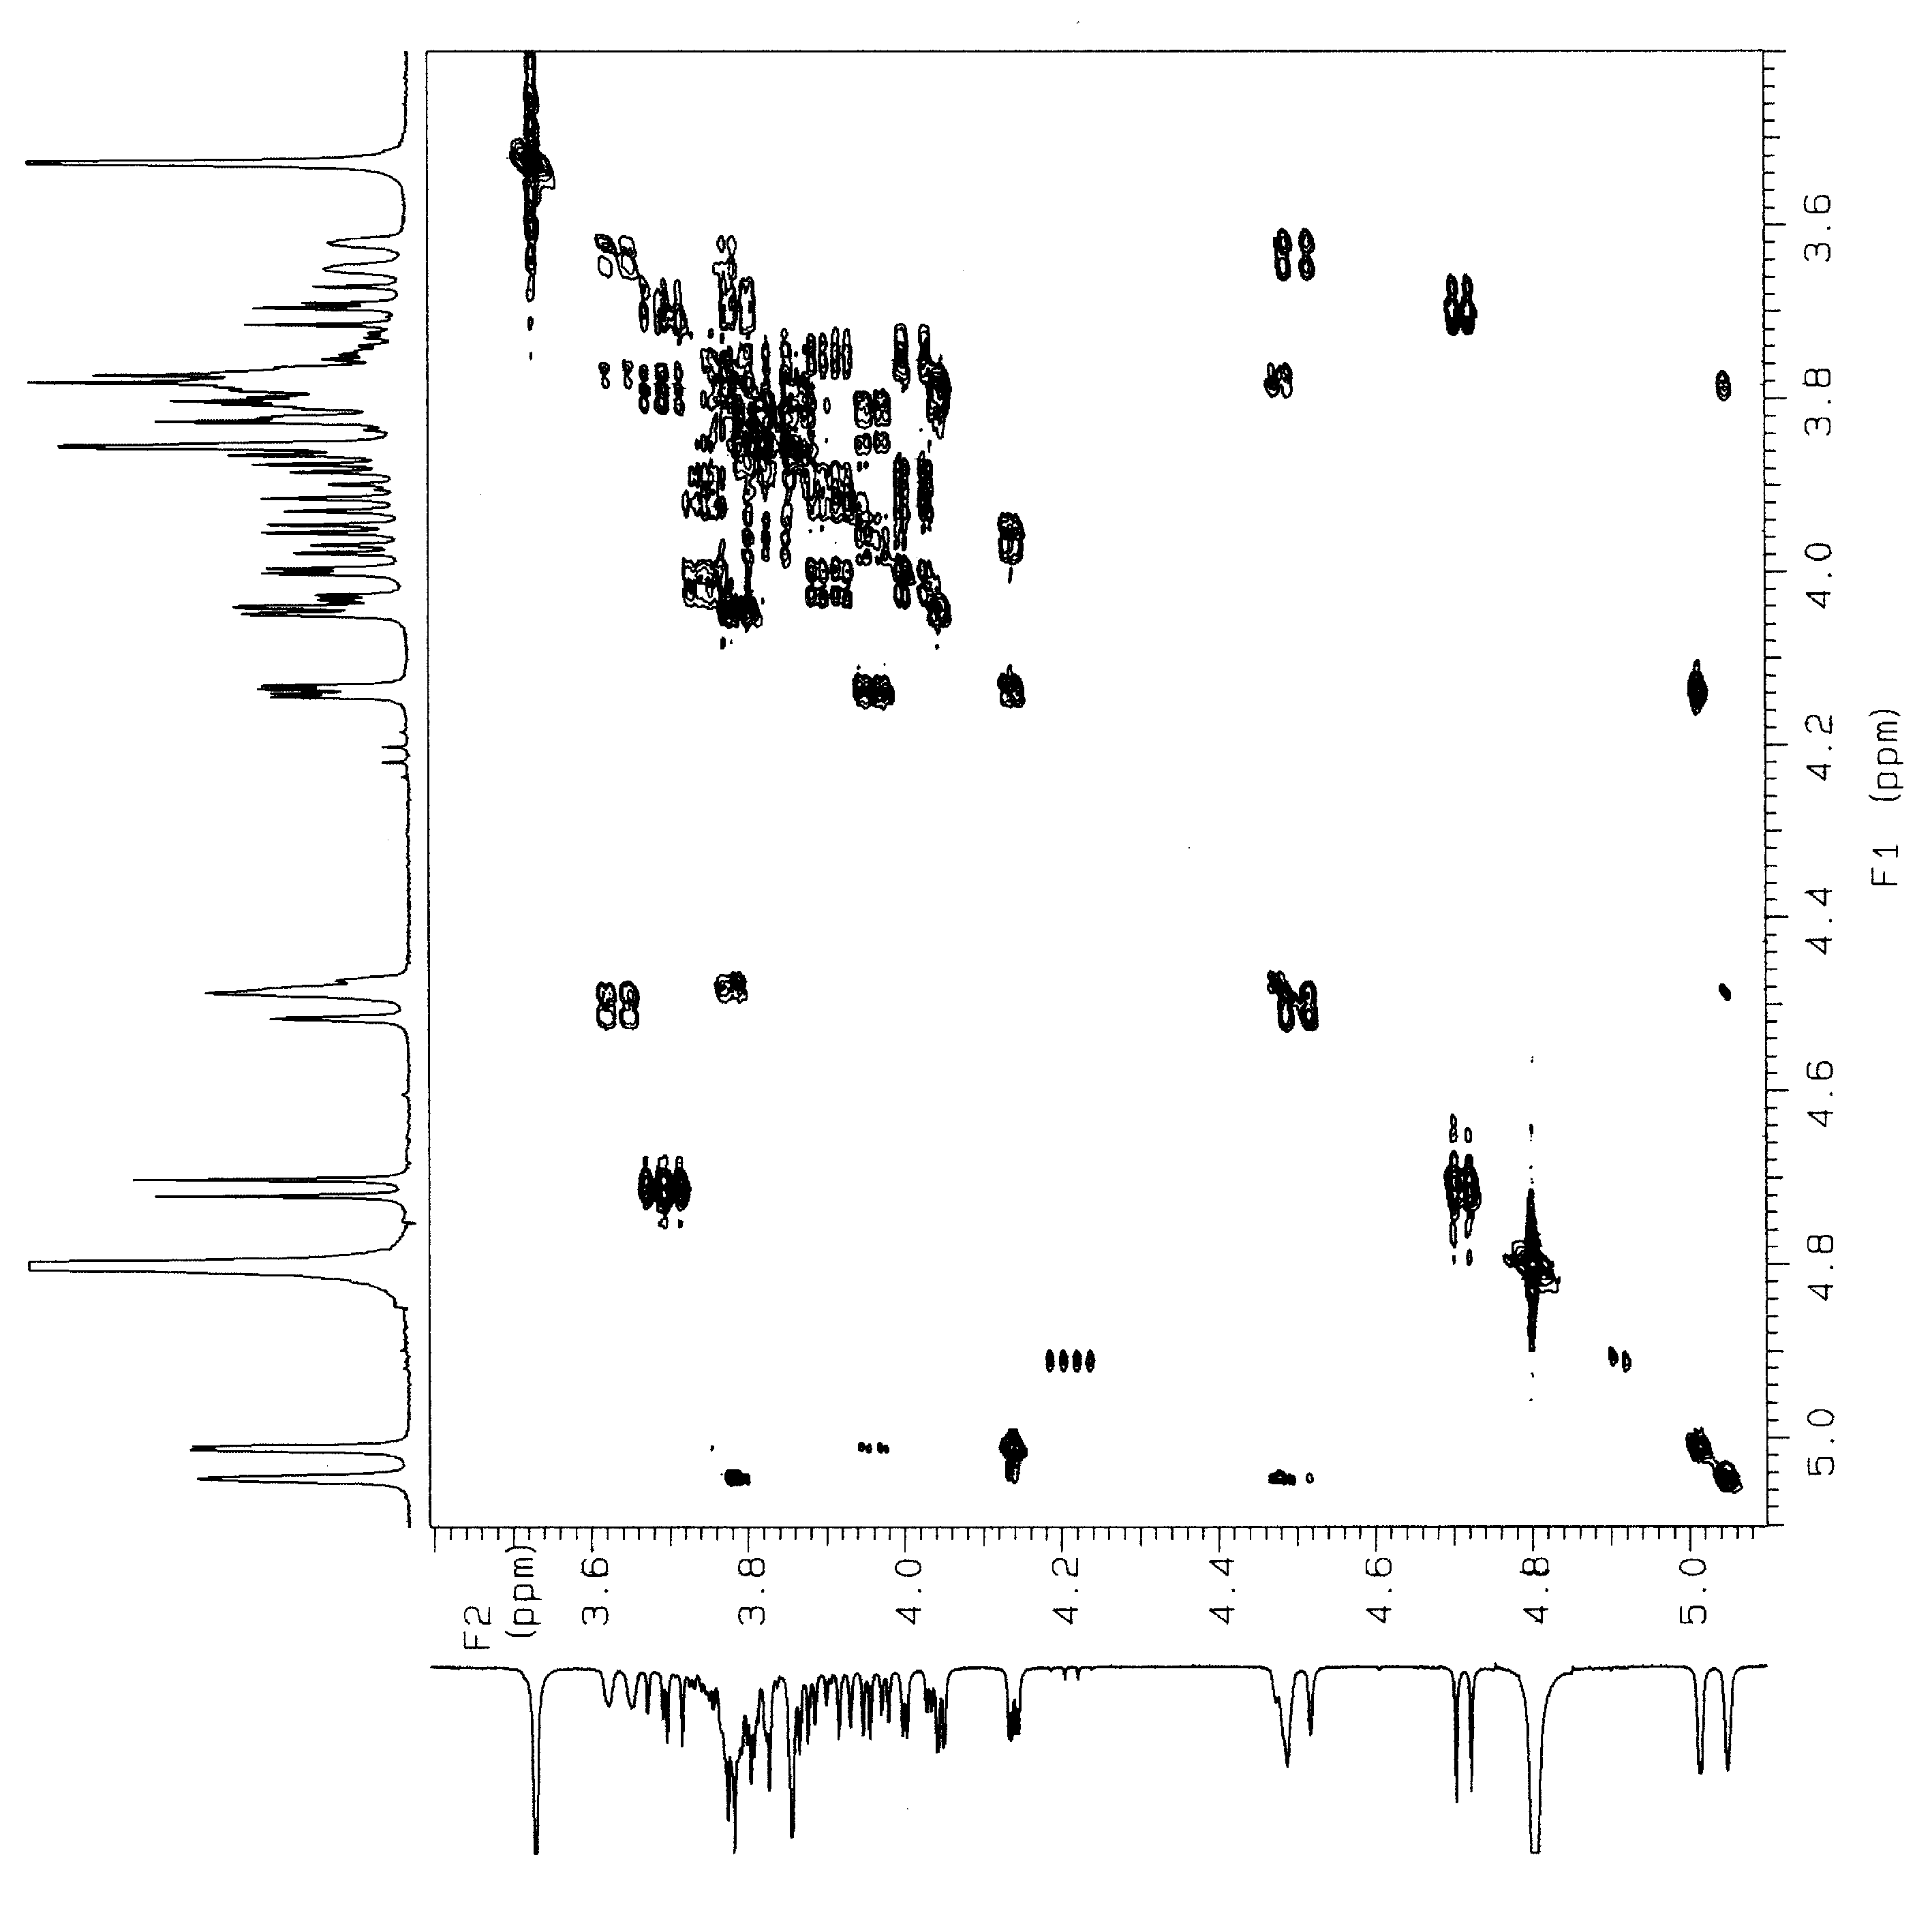


Figure S10. COSY spectrum of **5** in D2O.


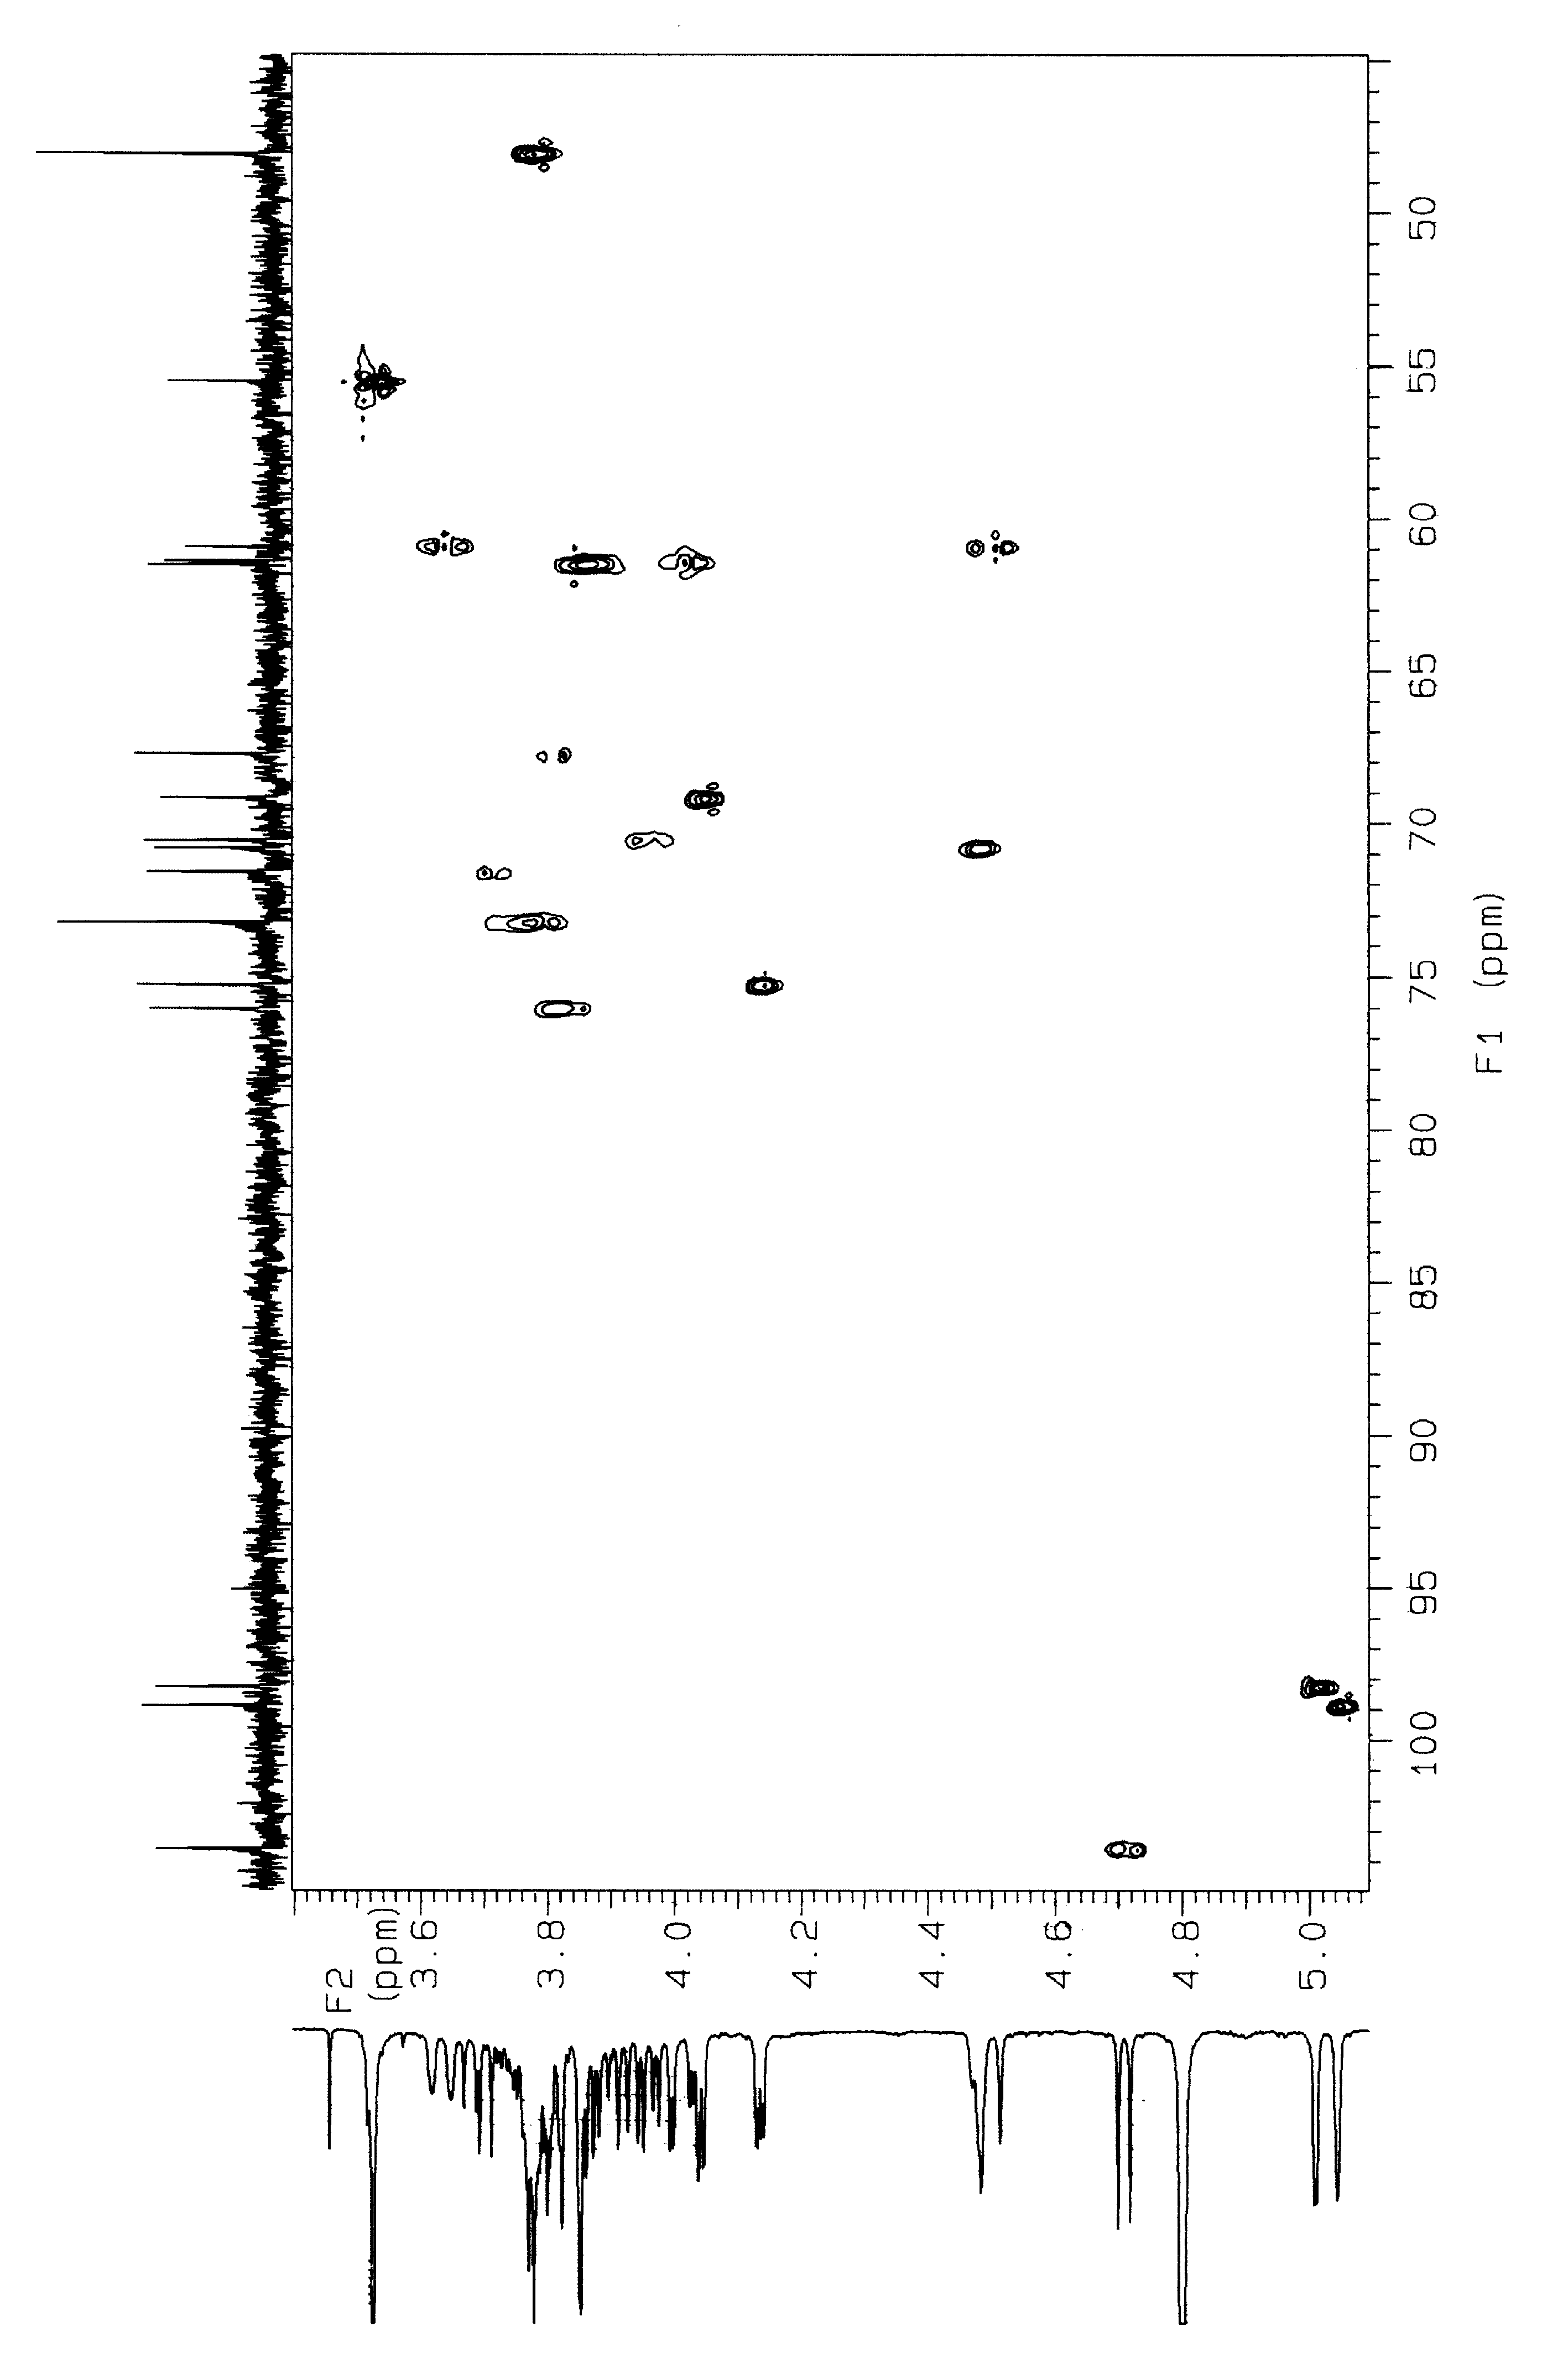


Figure S11. HMQC spectrum of **5** in D2O.


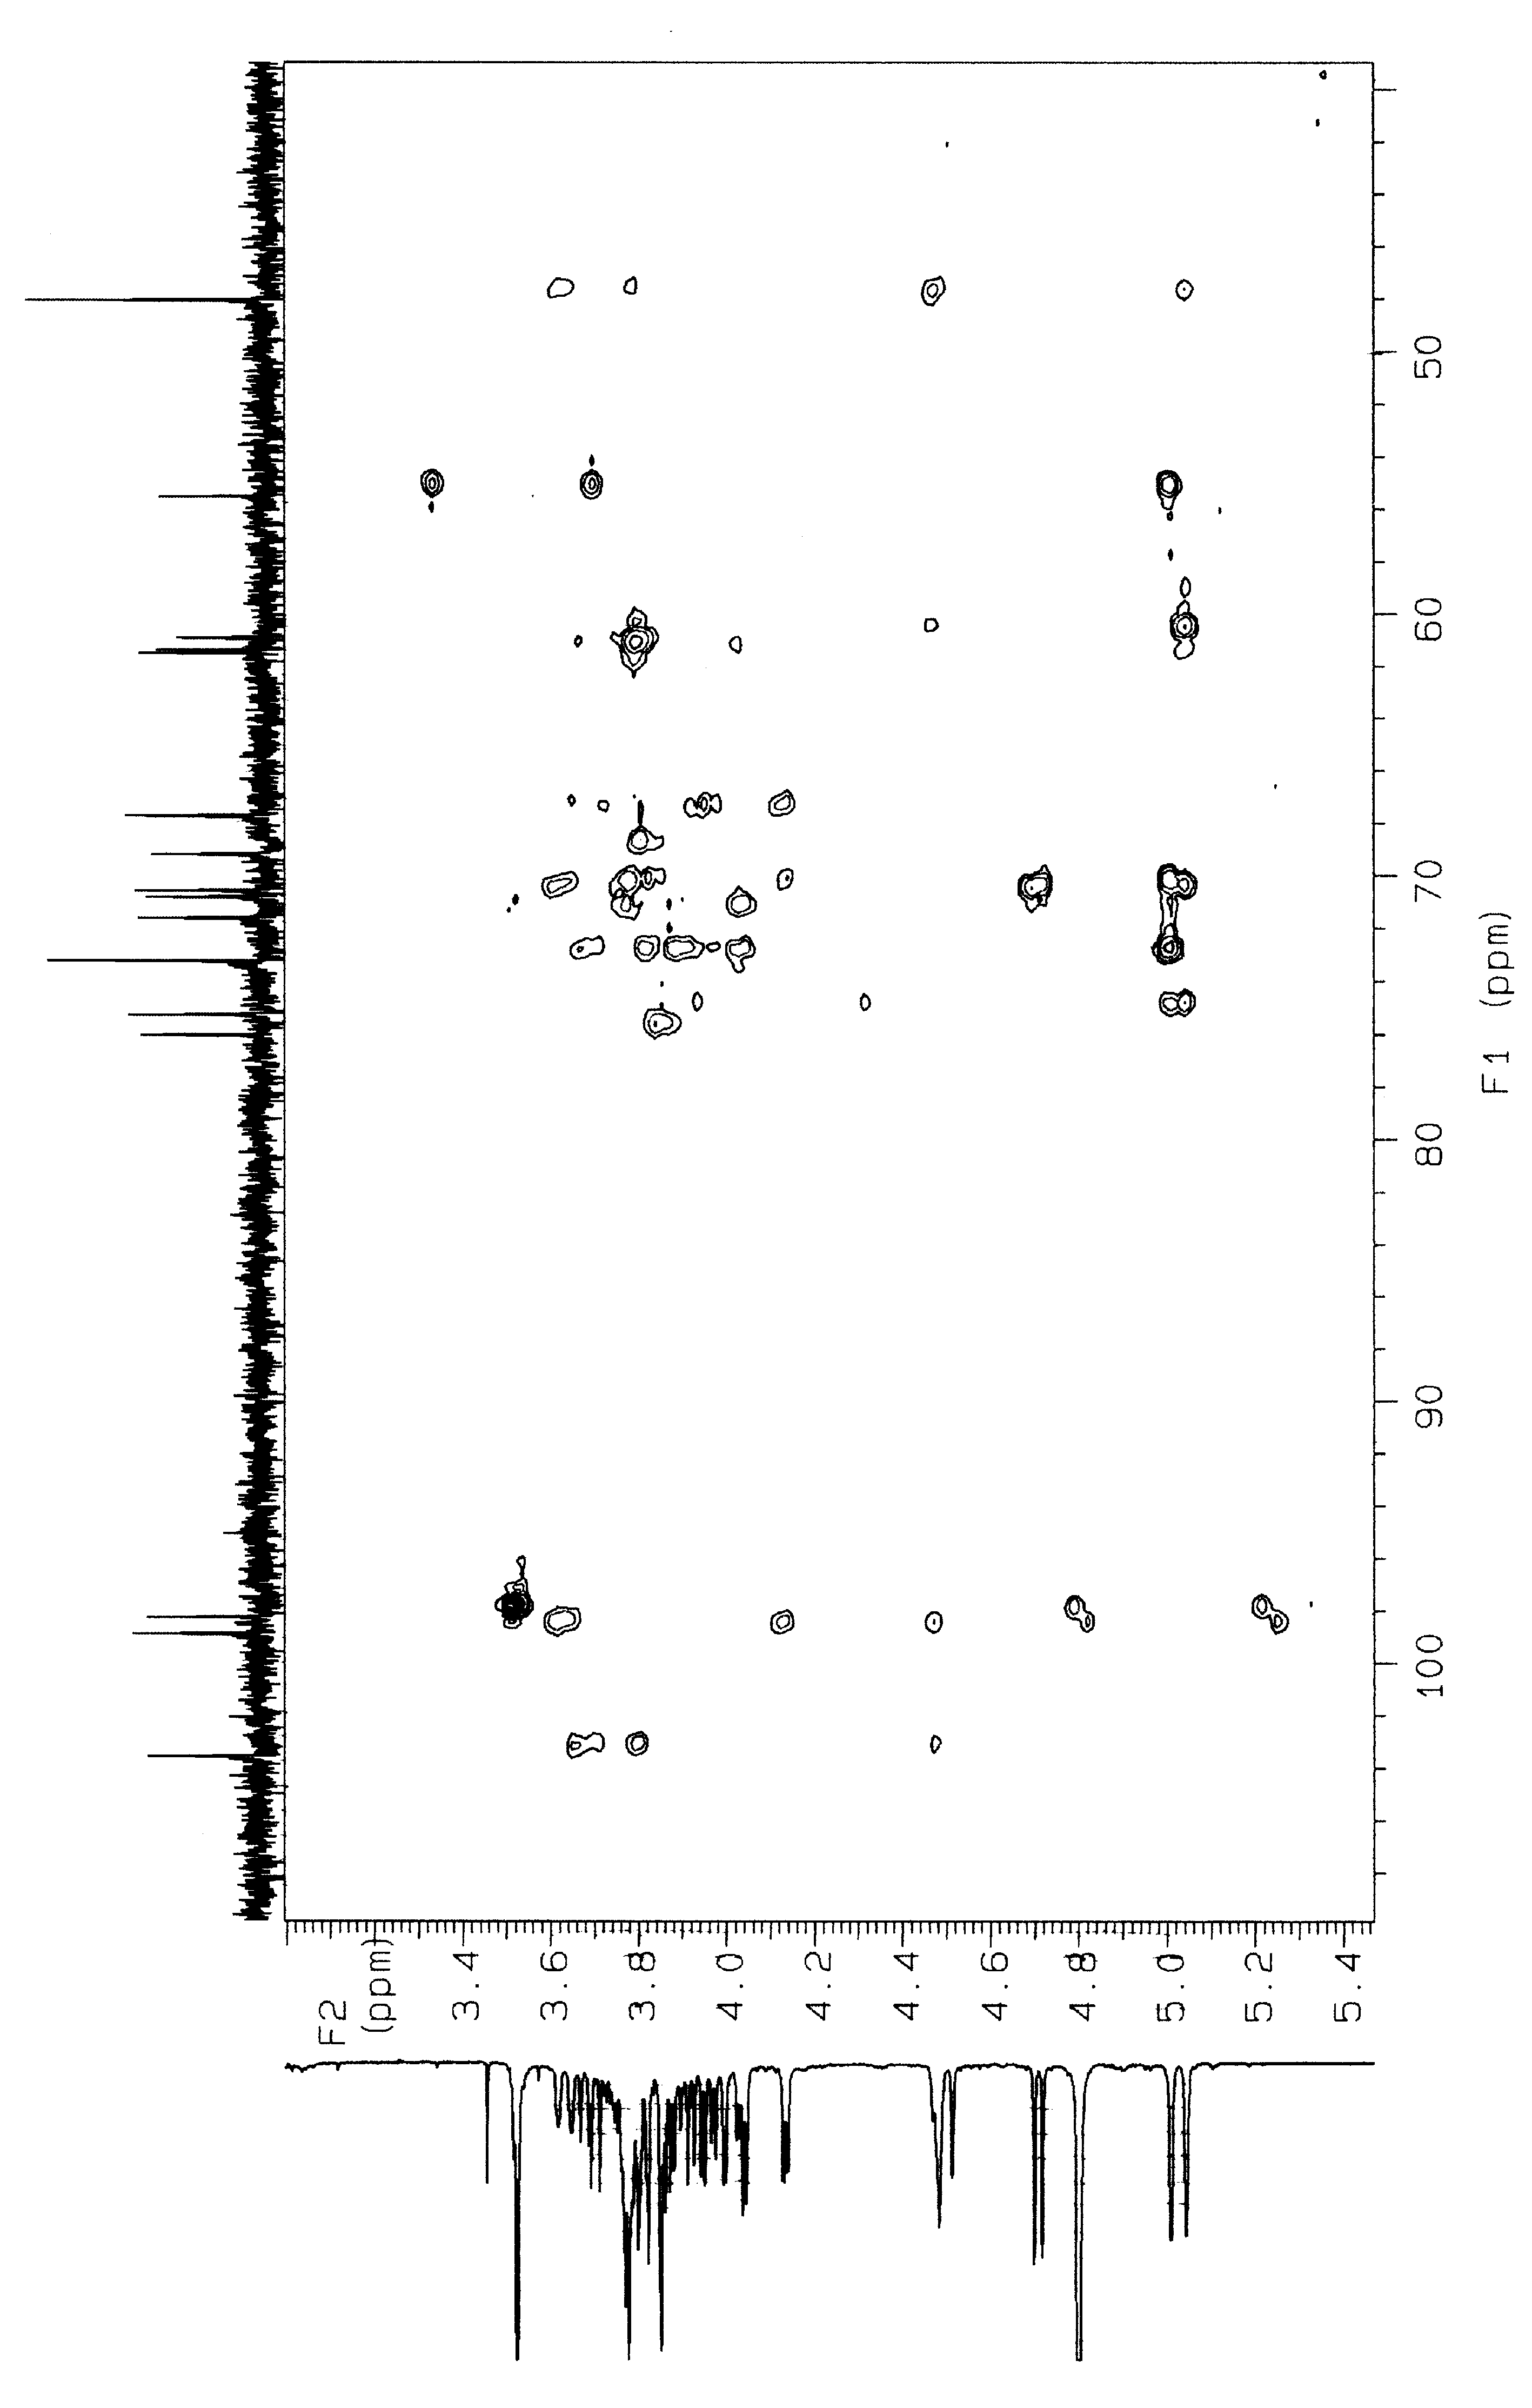


Figure S12. HMBC spectrum of **5** in D2O.


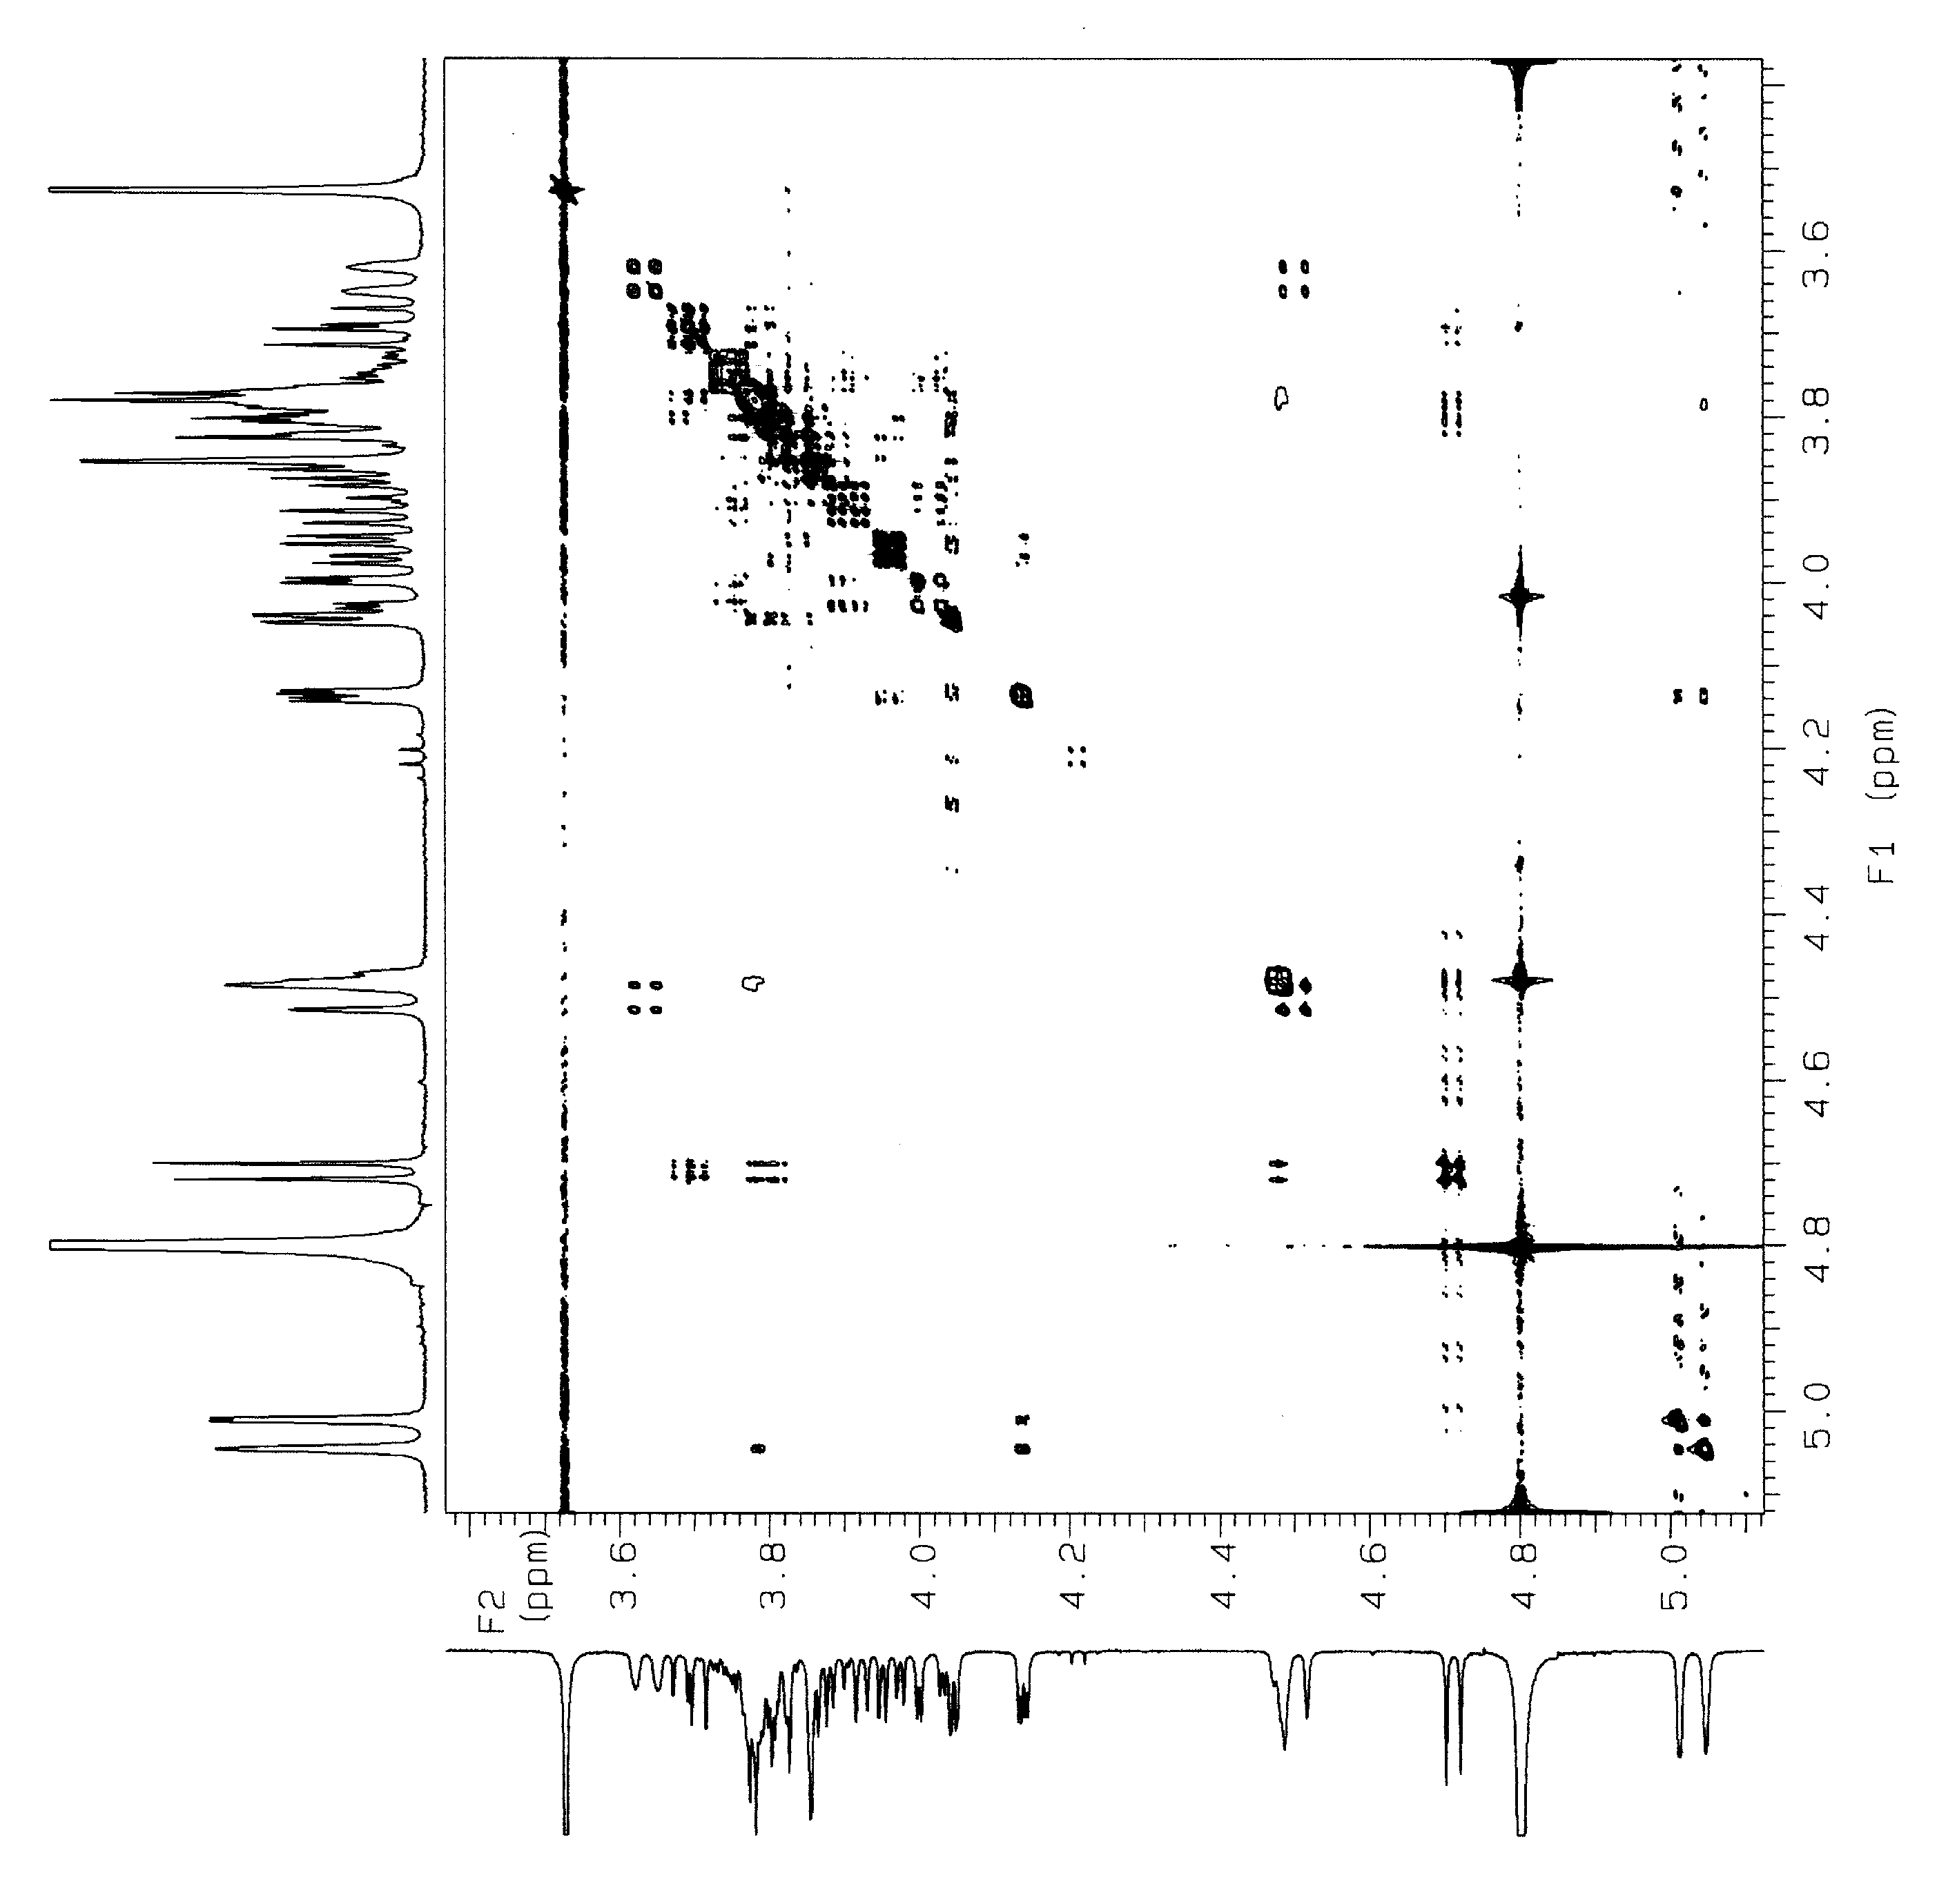


Figure S13. NOESY spectrum of **5** in D2O.


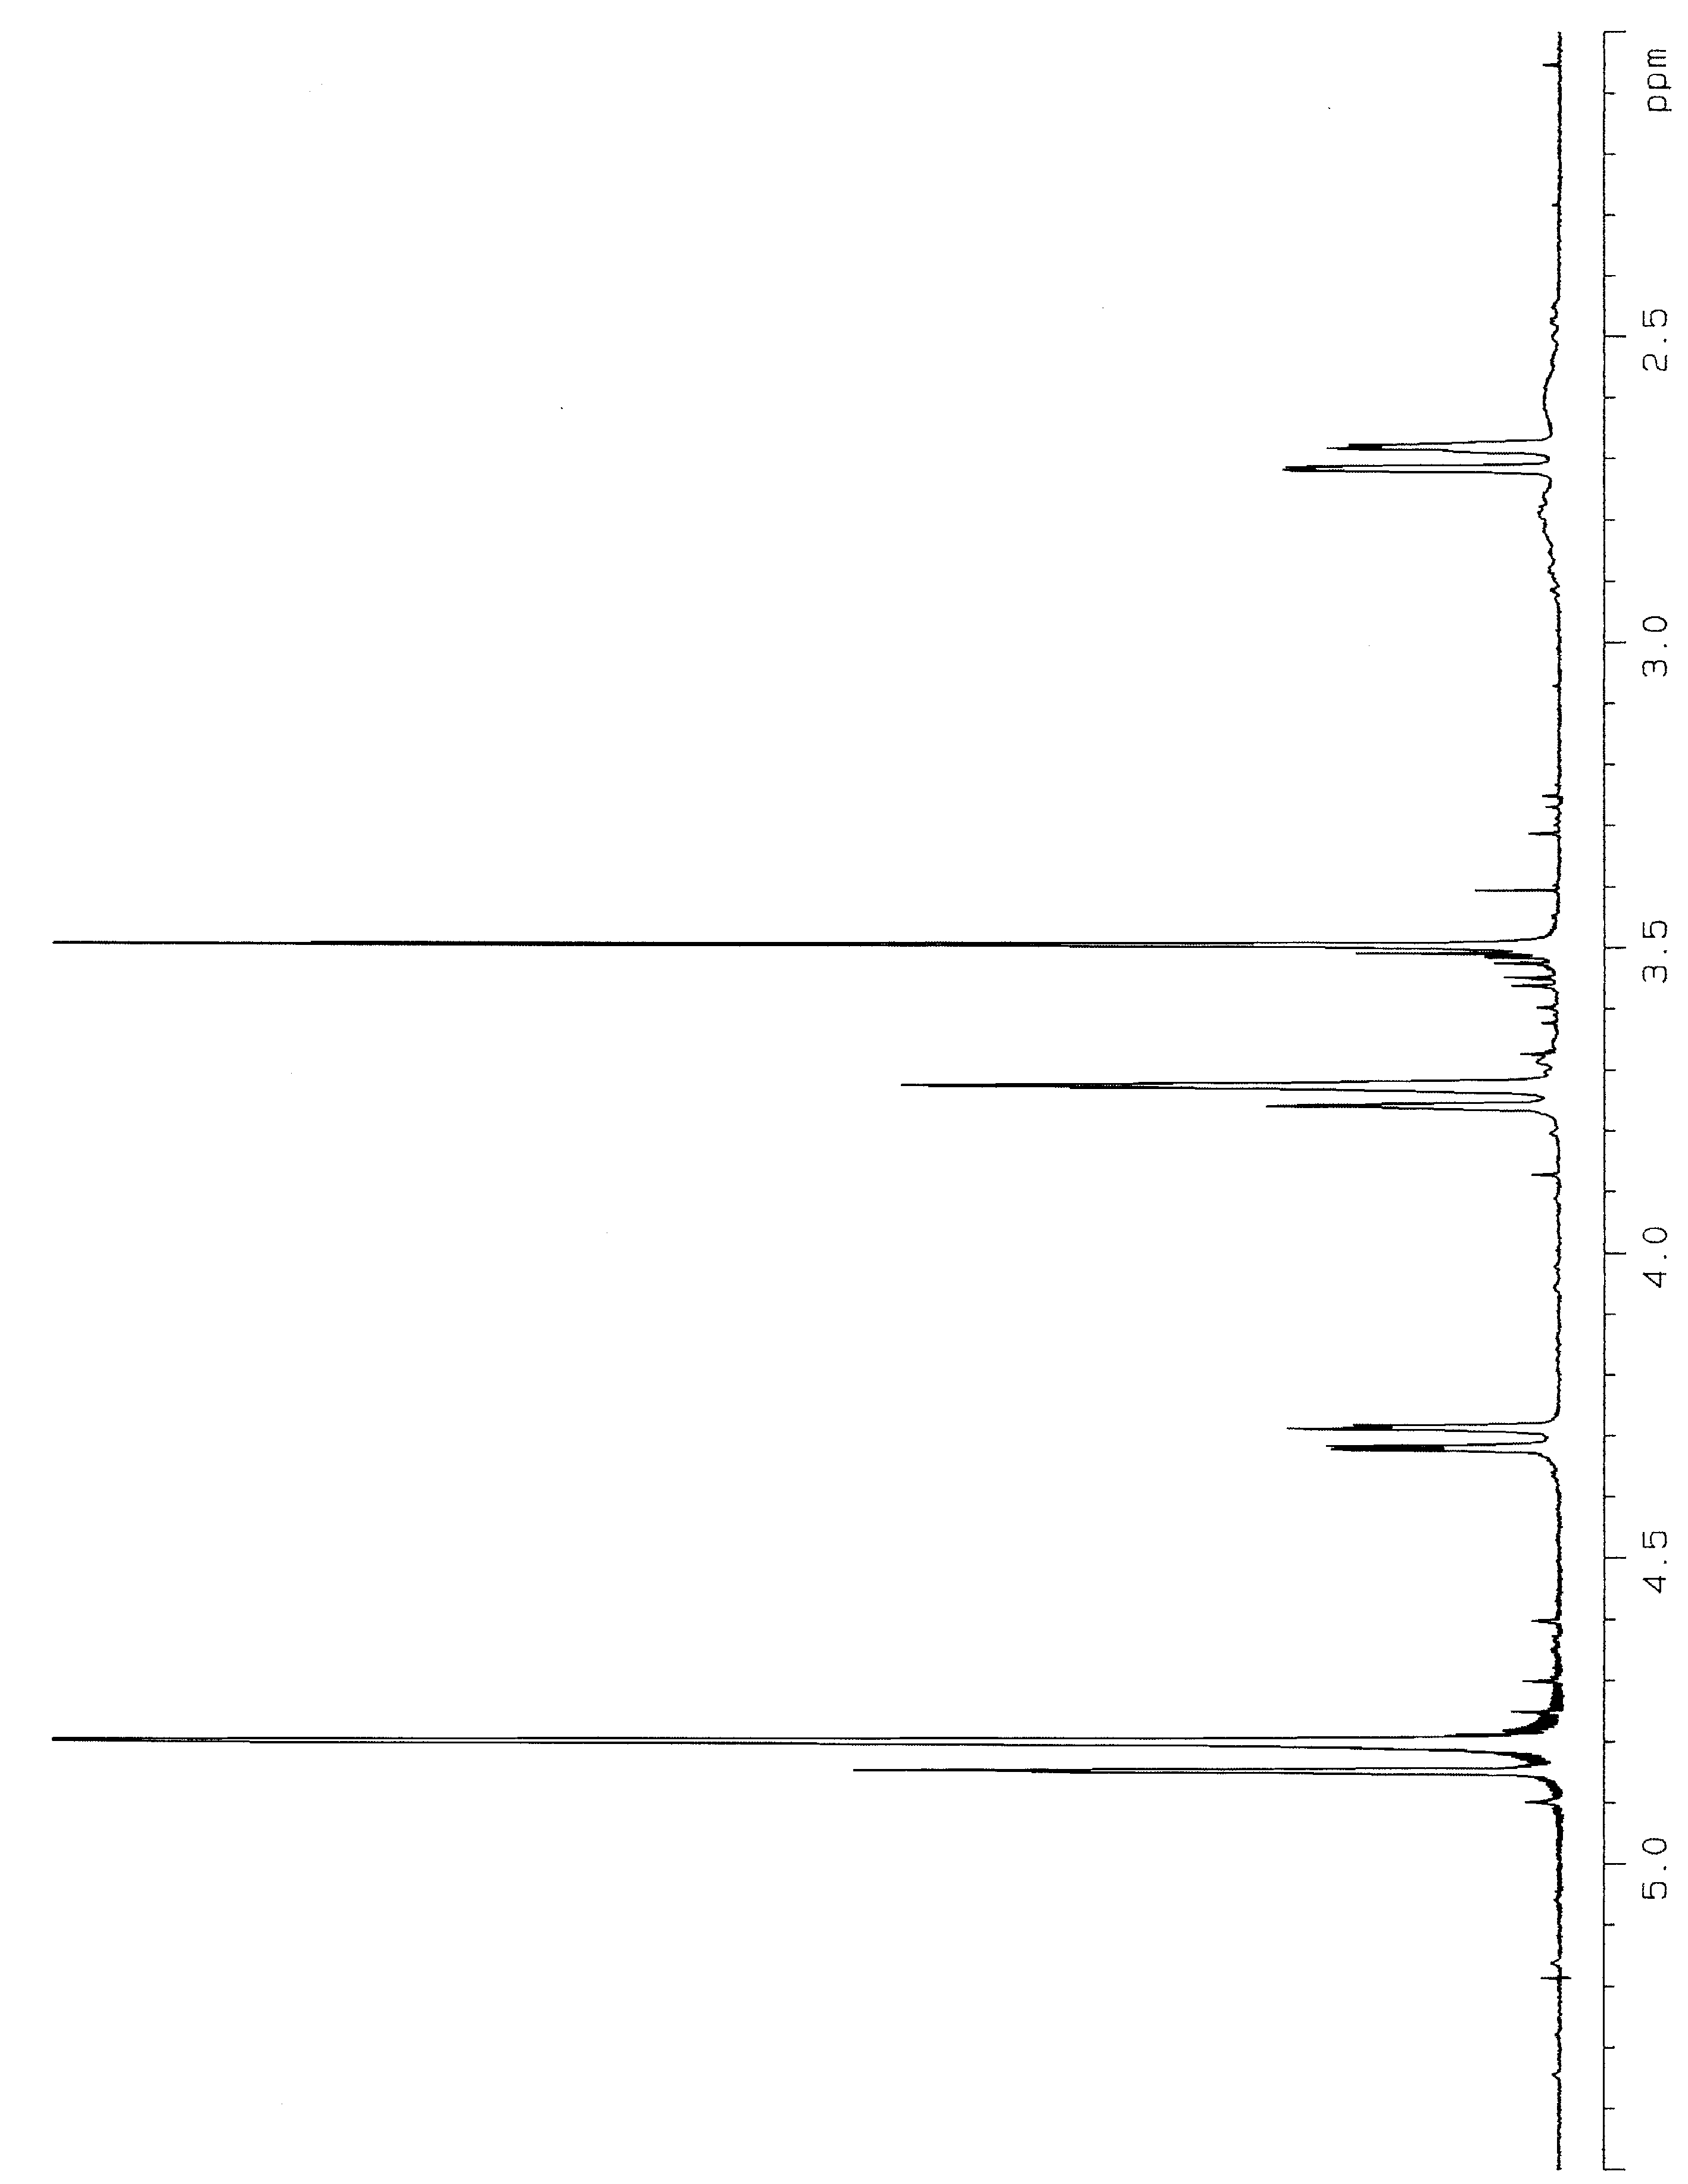


Figure S14. 1H NMR spectrum of **4** in D2O.


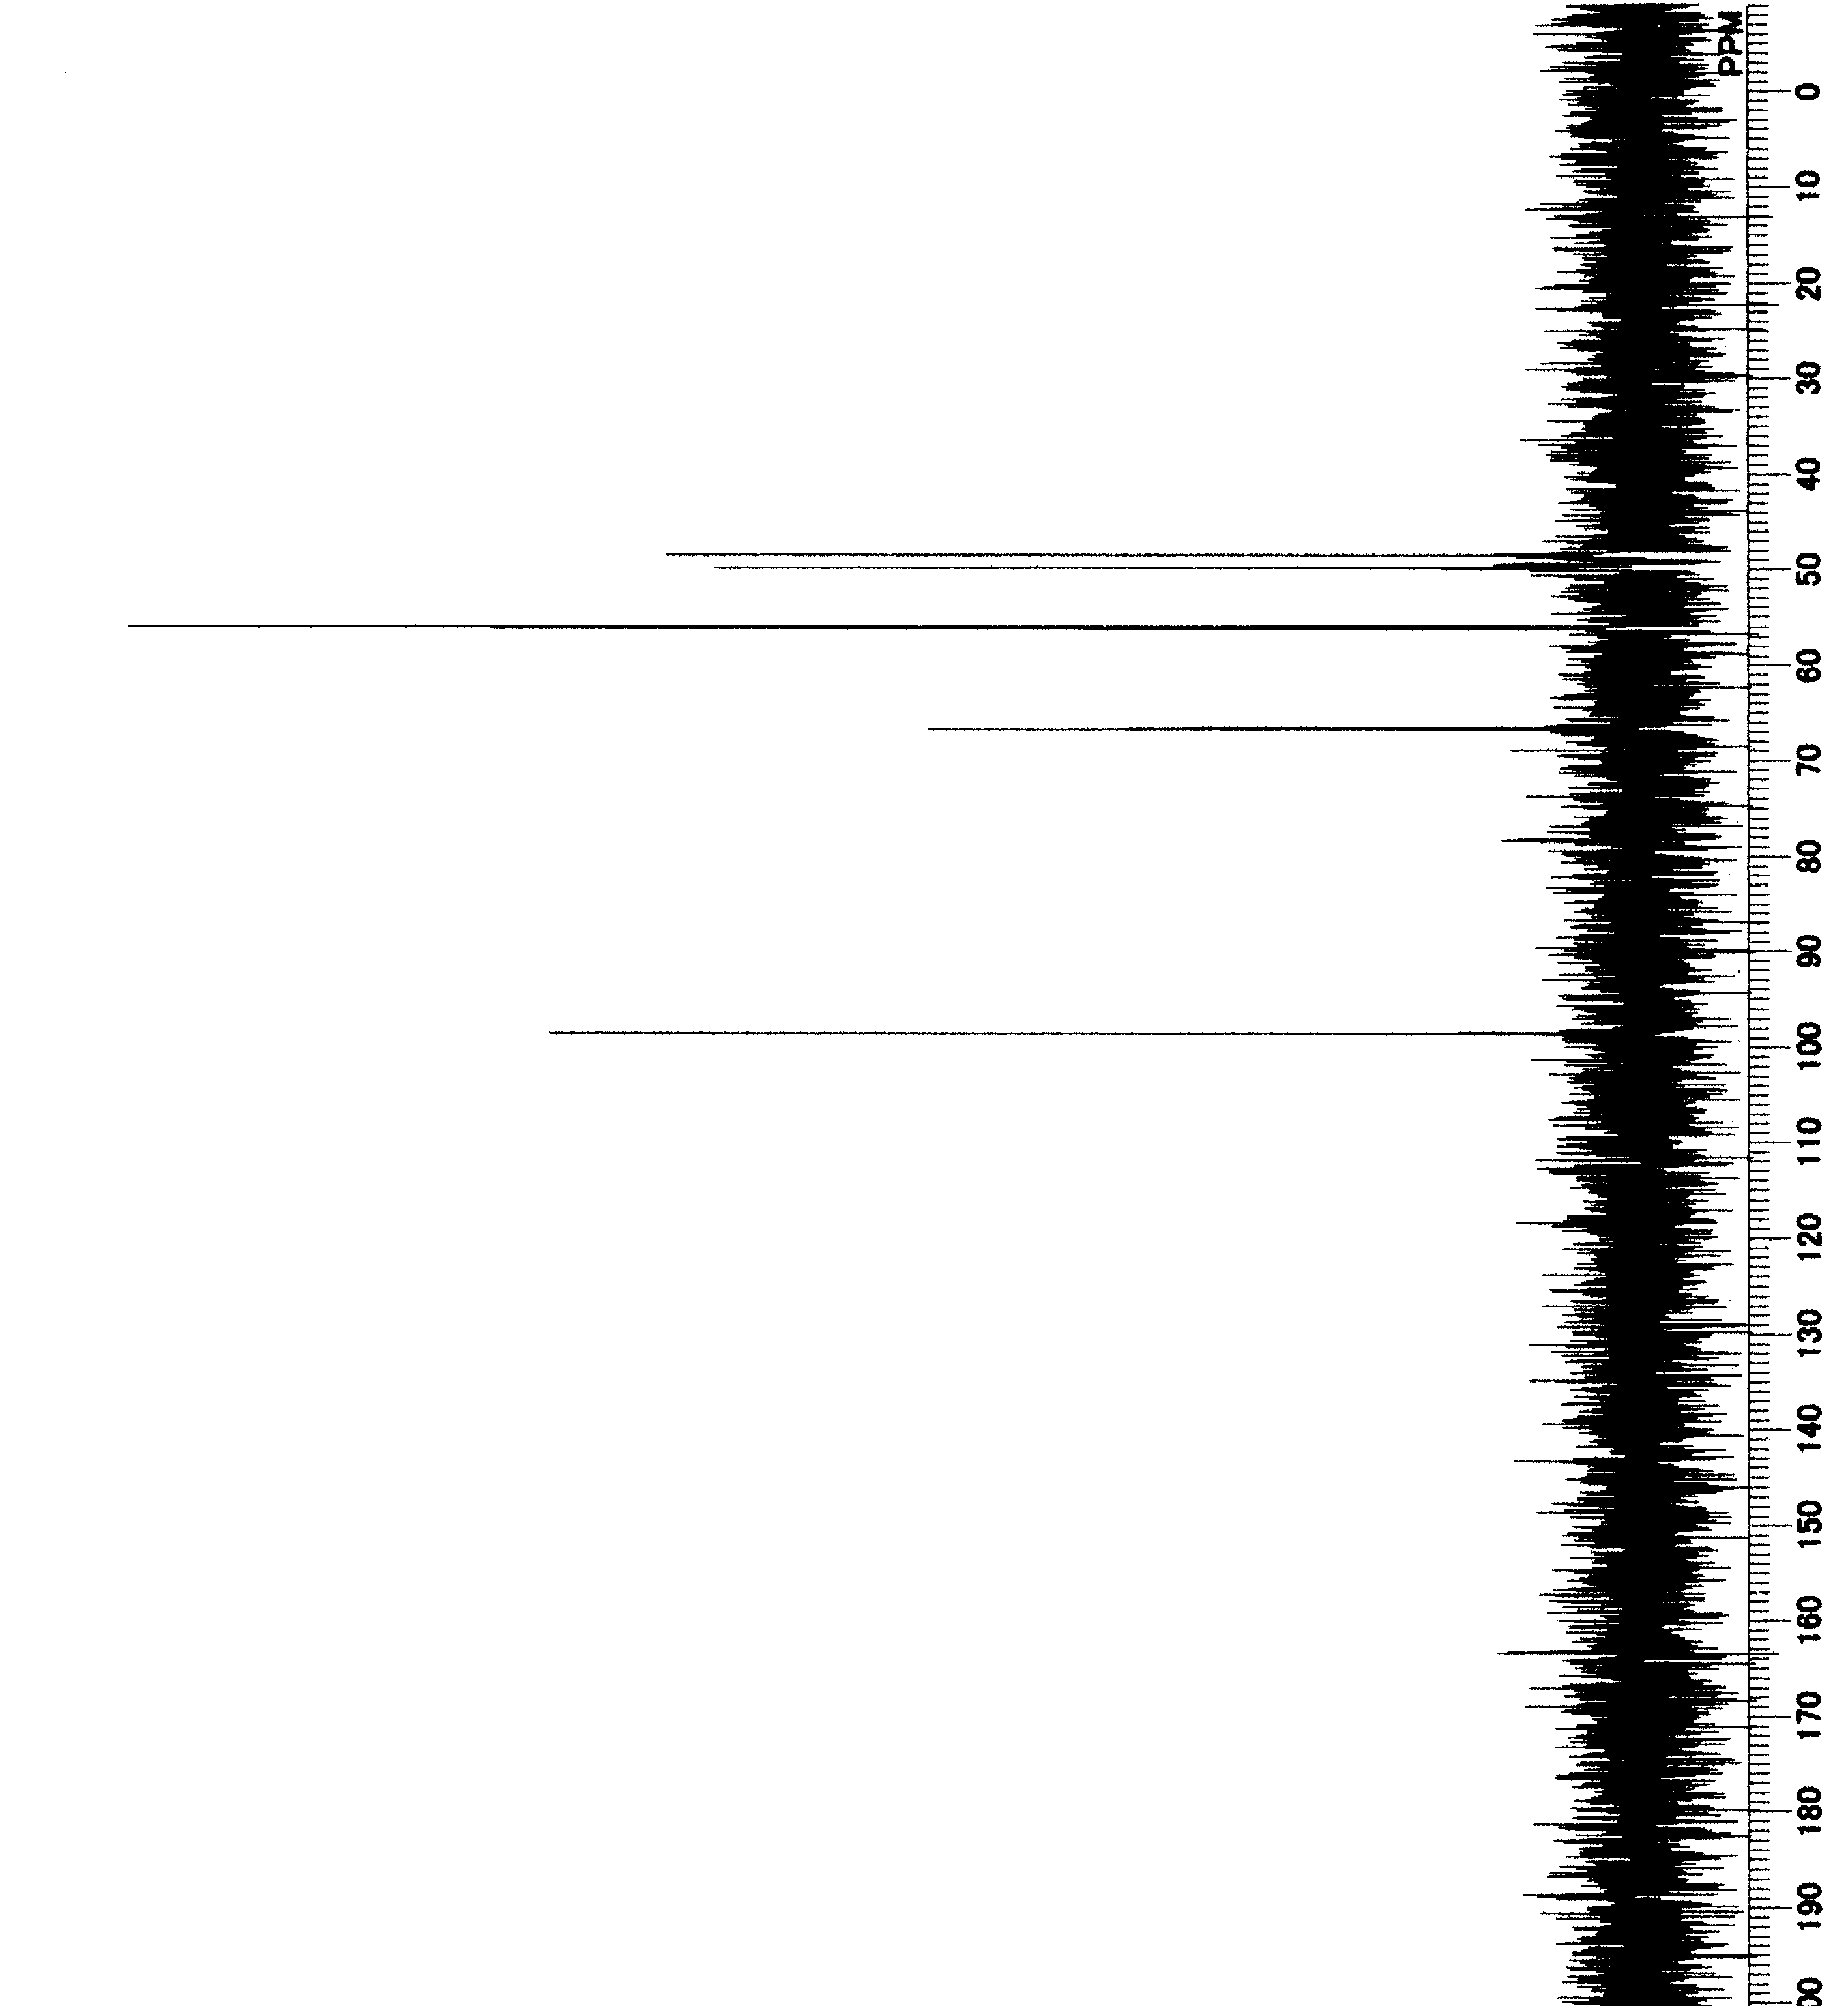


Figure S15. 13C NMR spectrum of **4** in D2O.


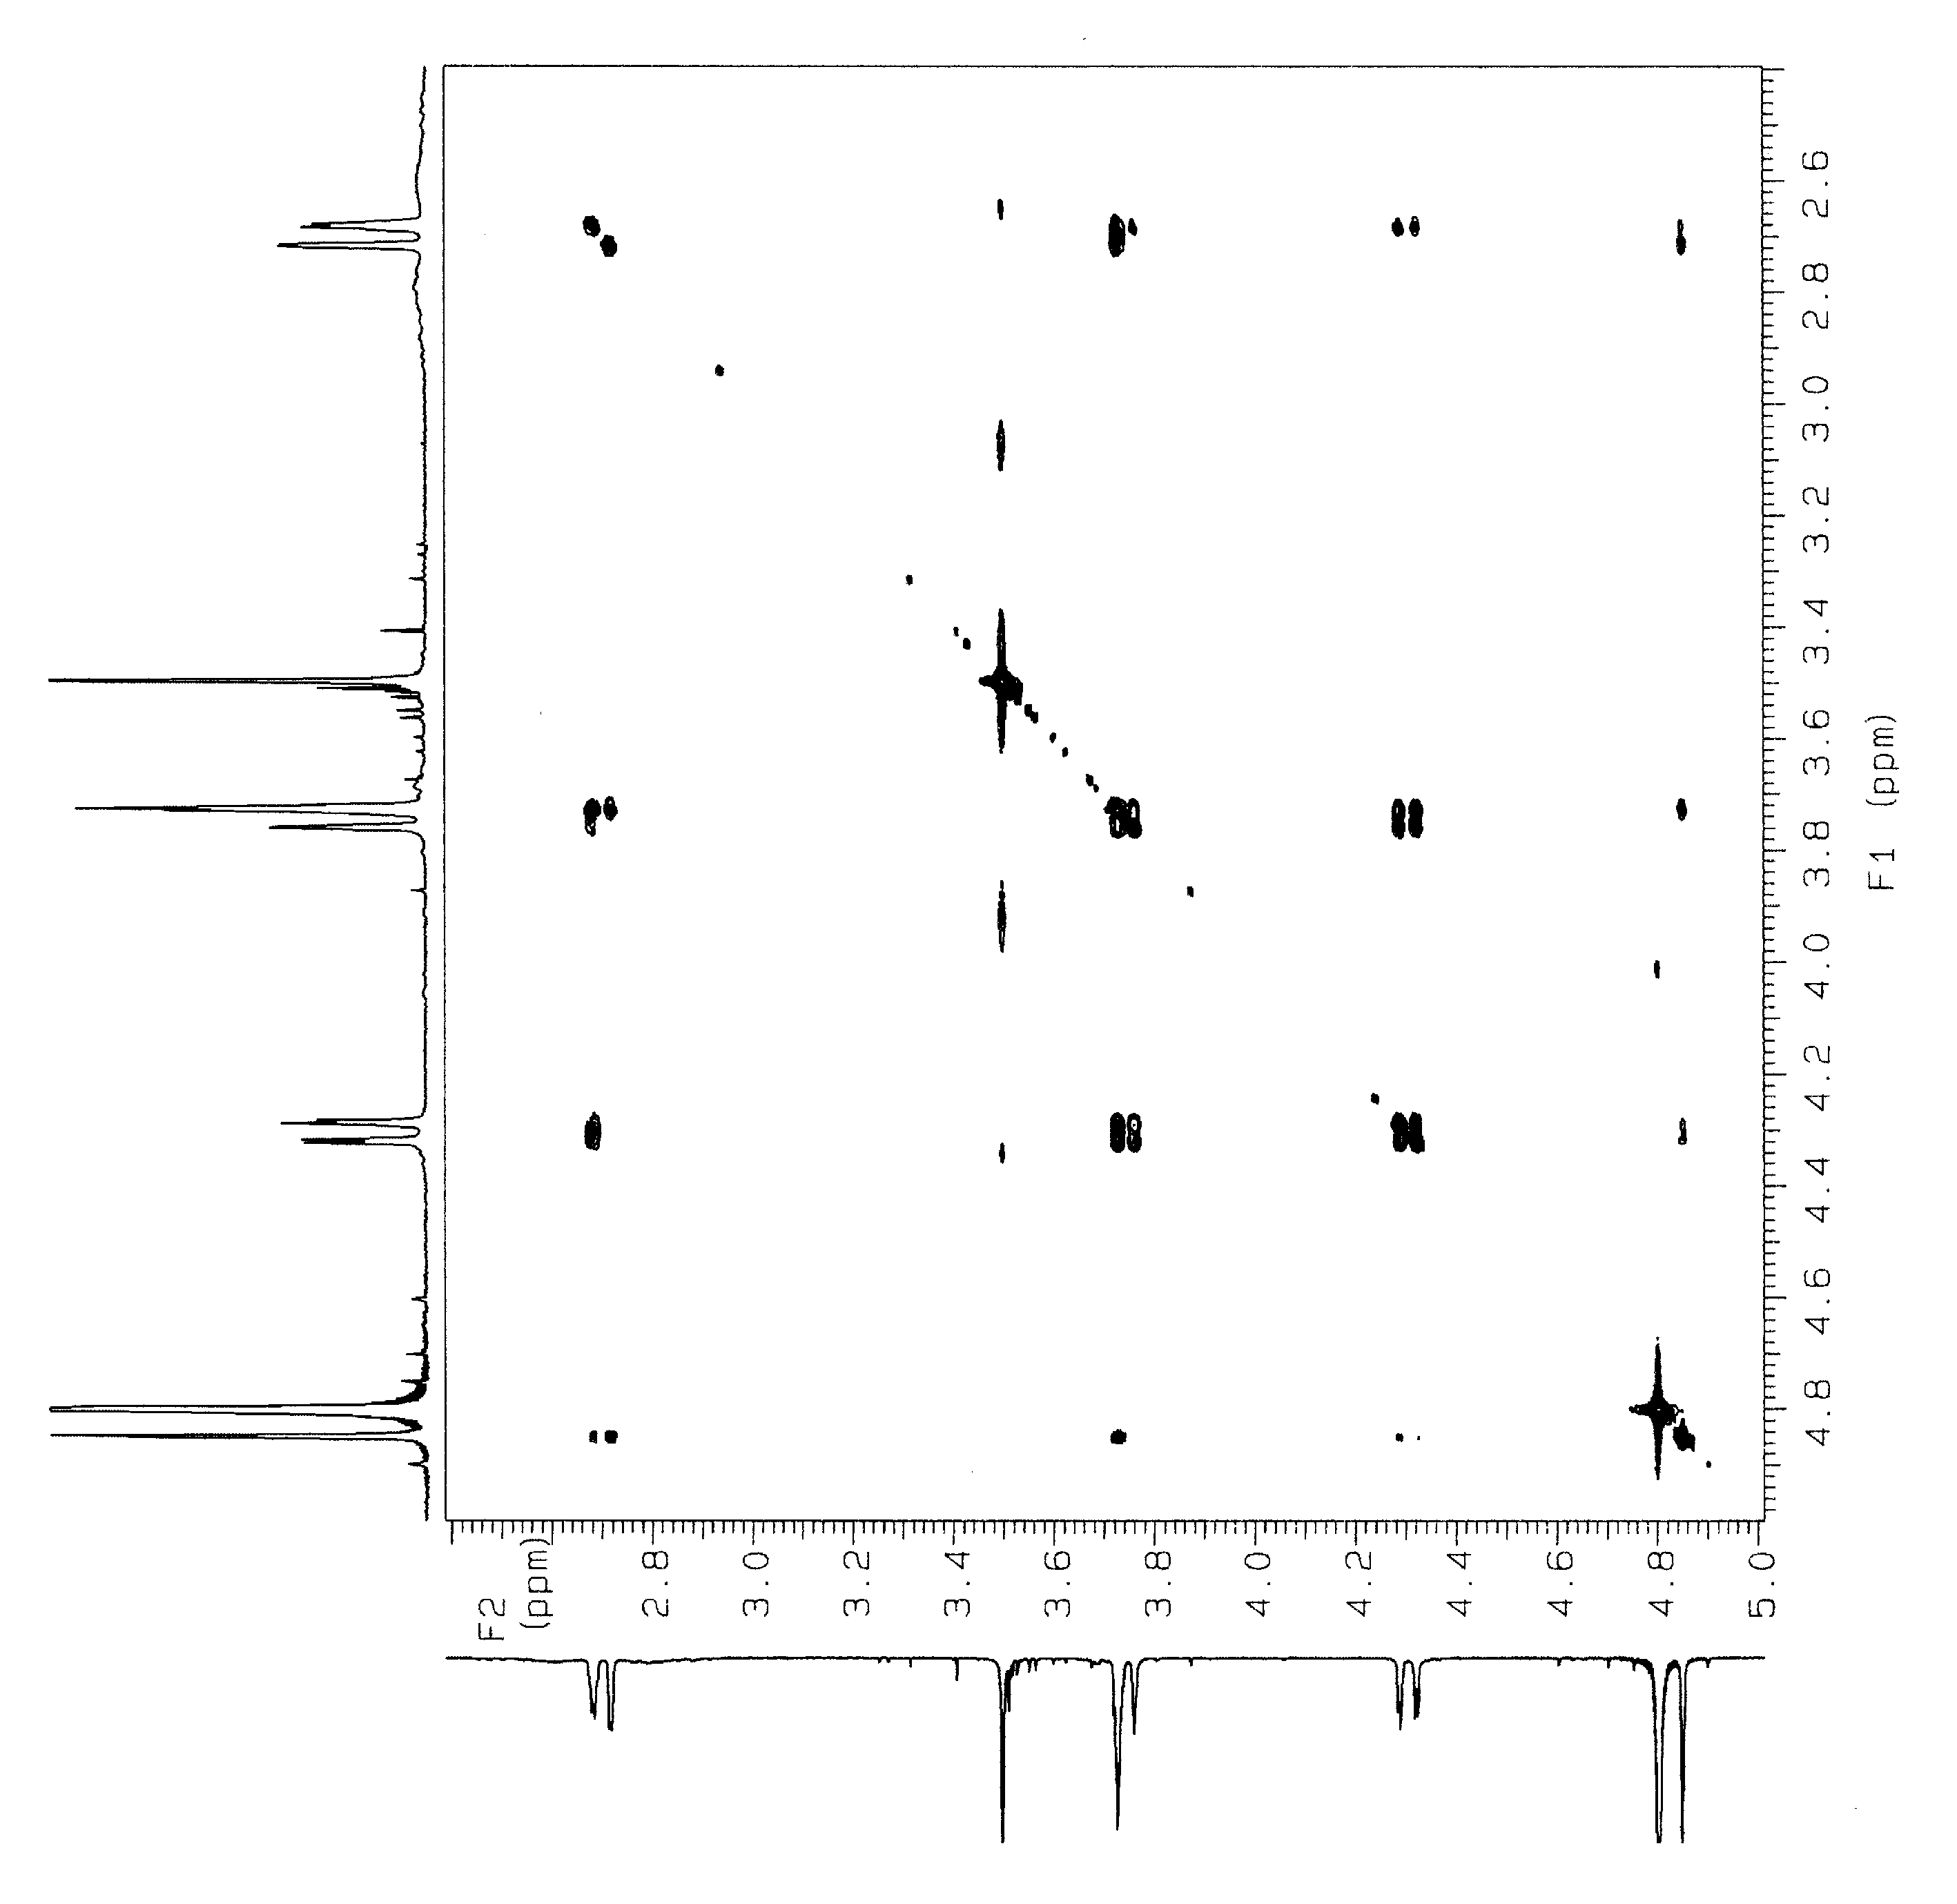


Figure S16.COSY spectrum of **4** in D2O.


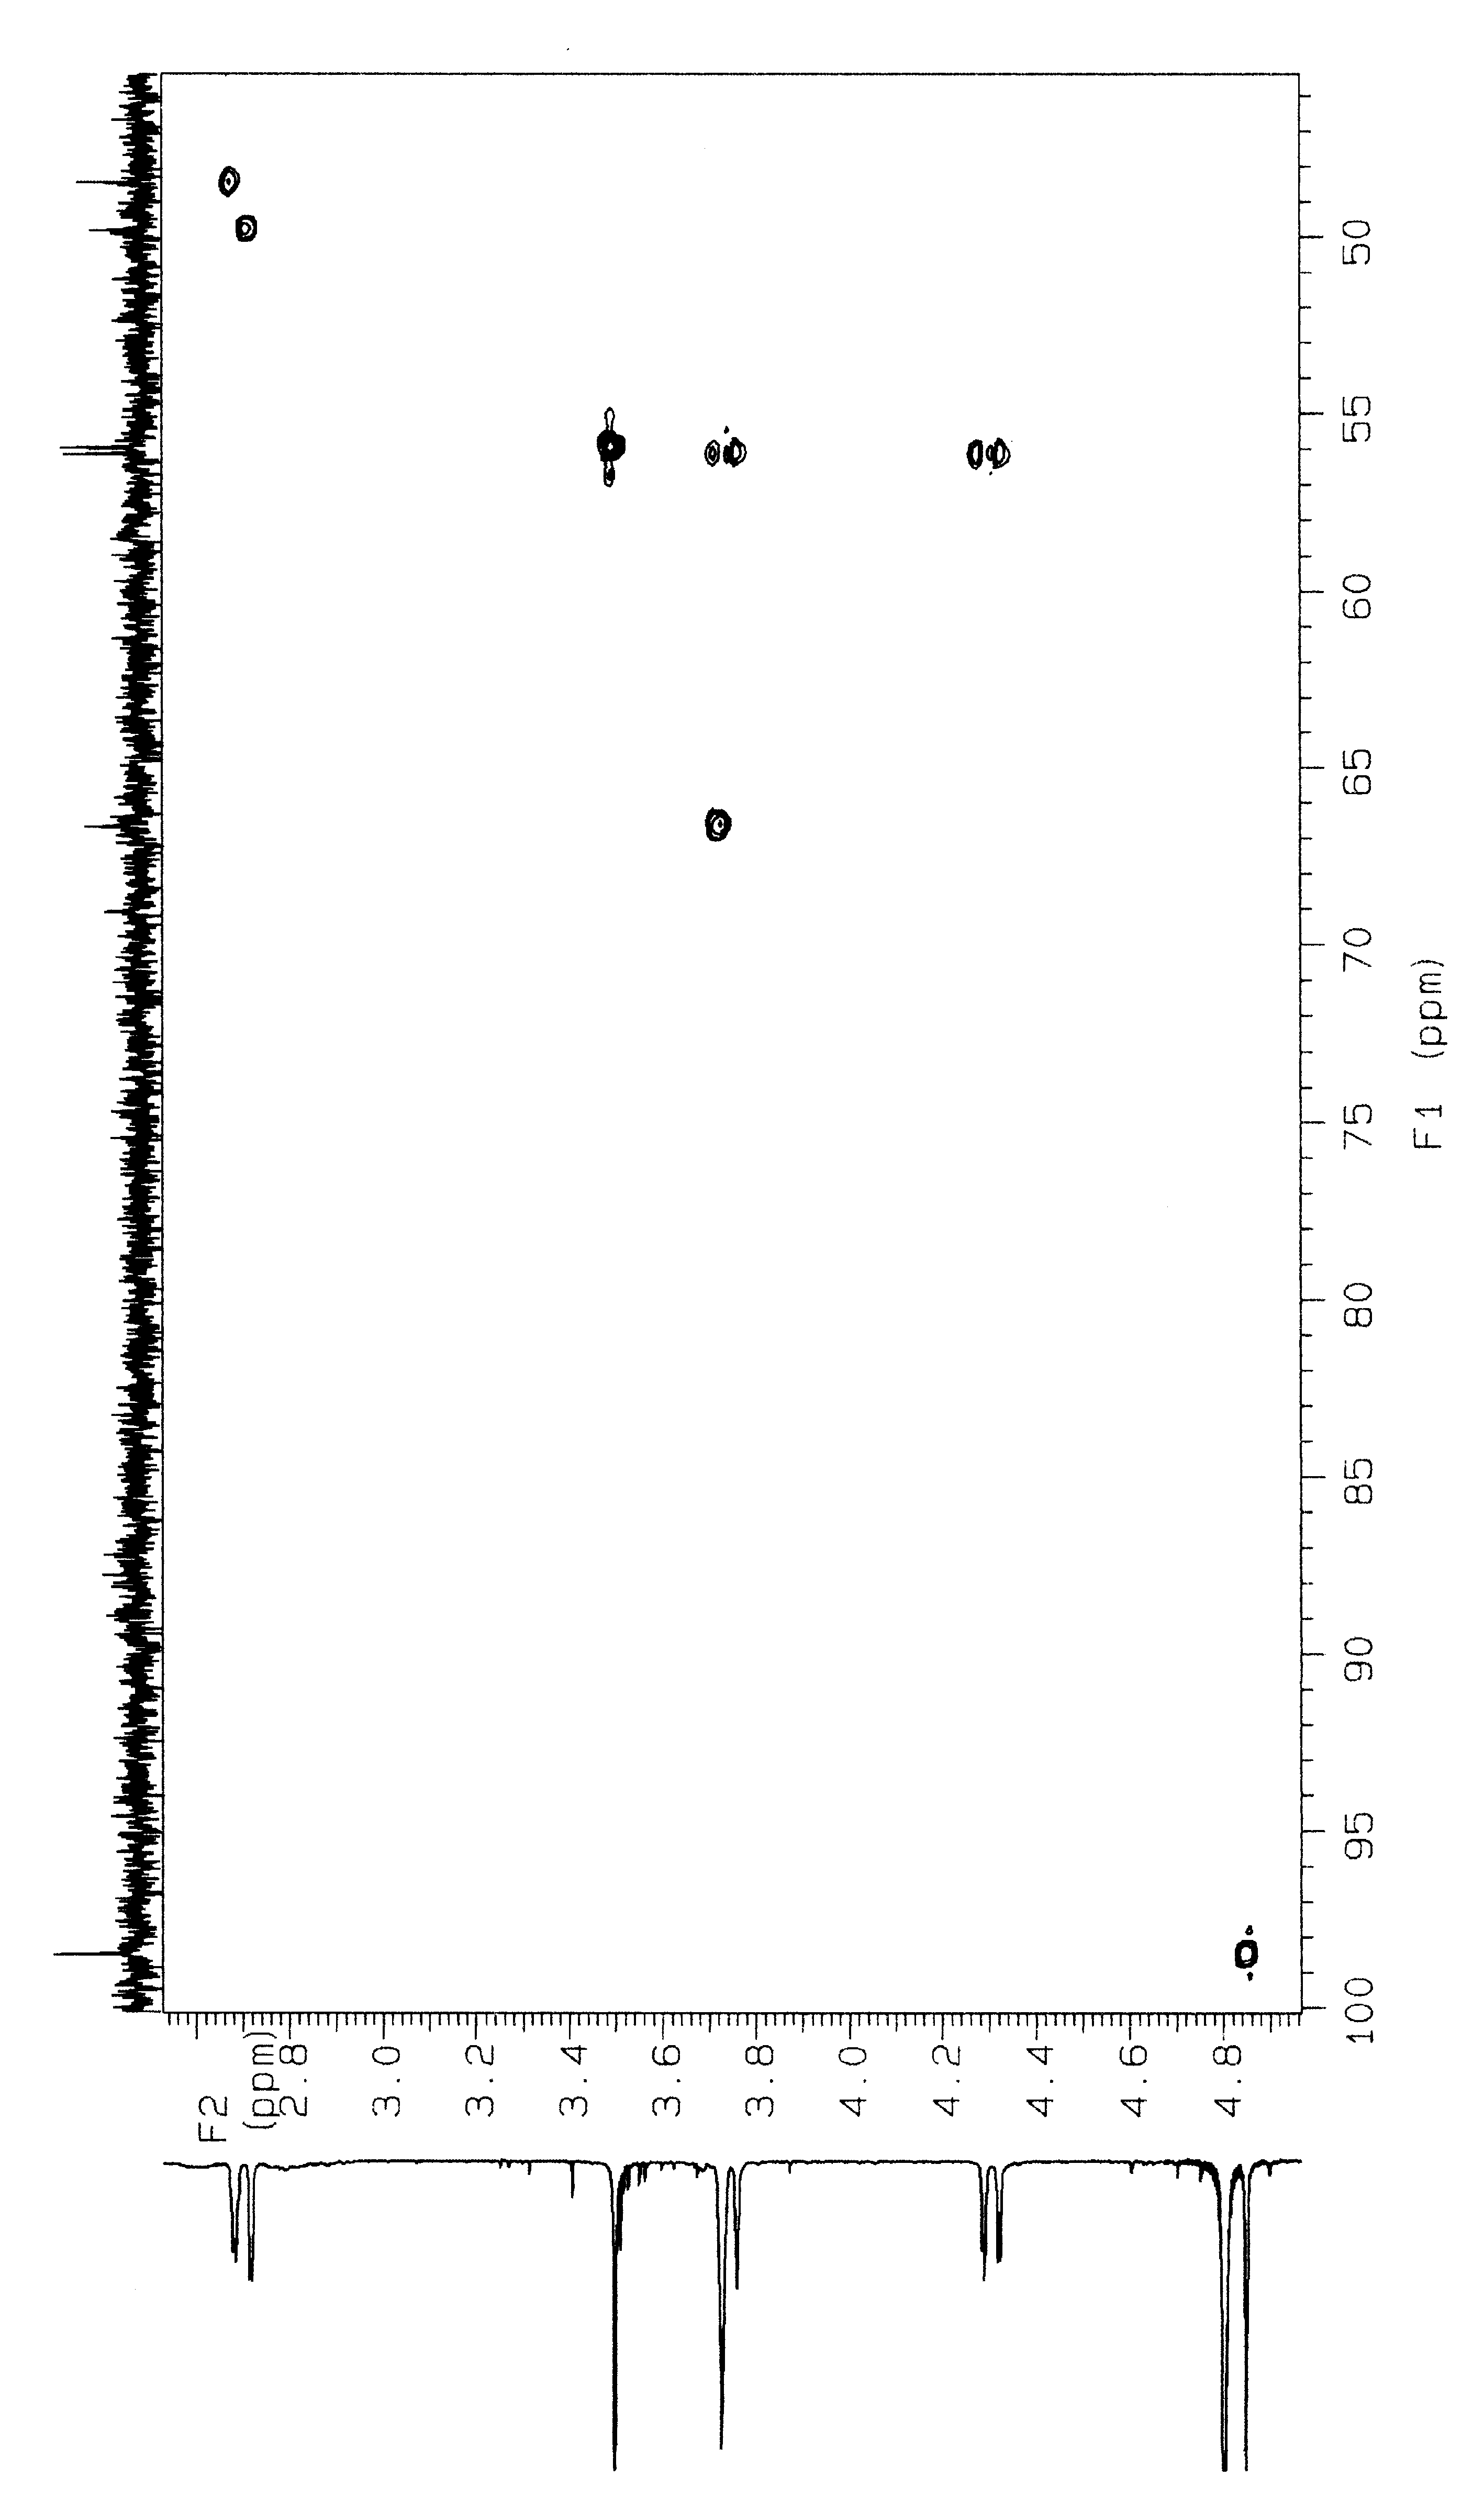


Figure S17.HMQC spectrum of **4** in D2O.


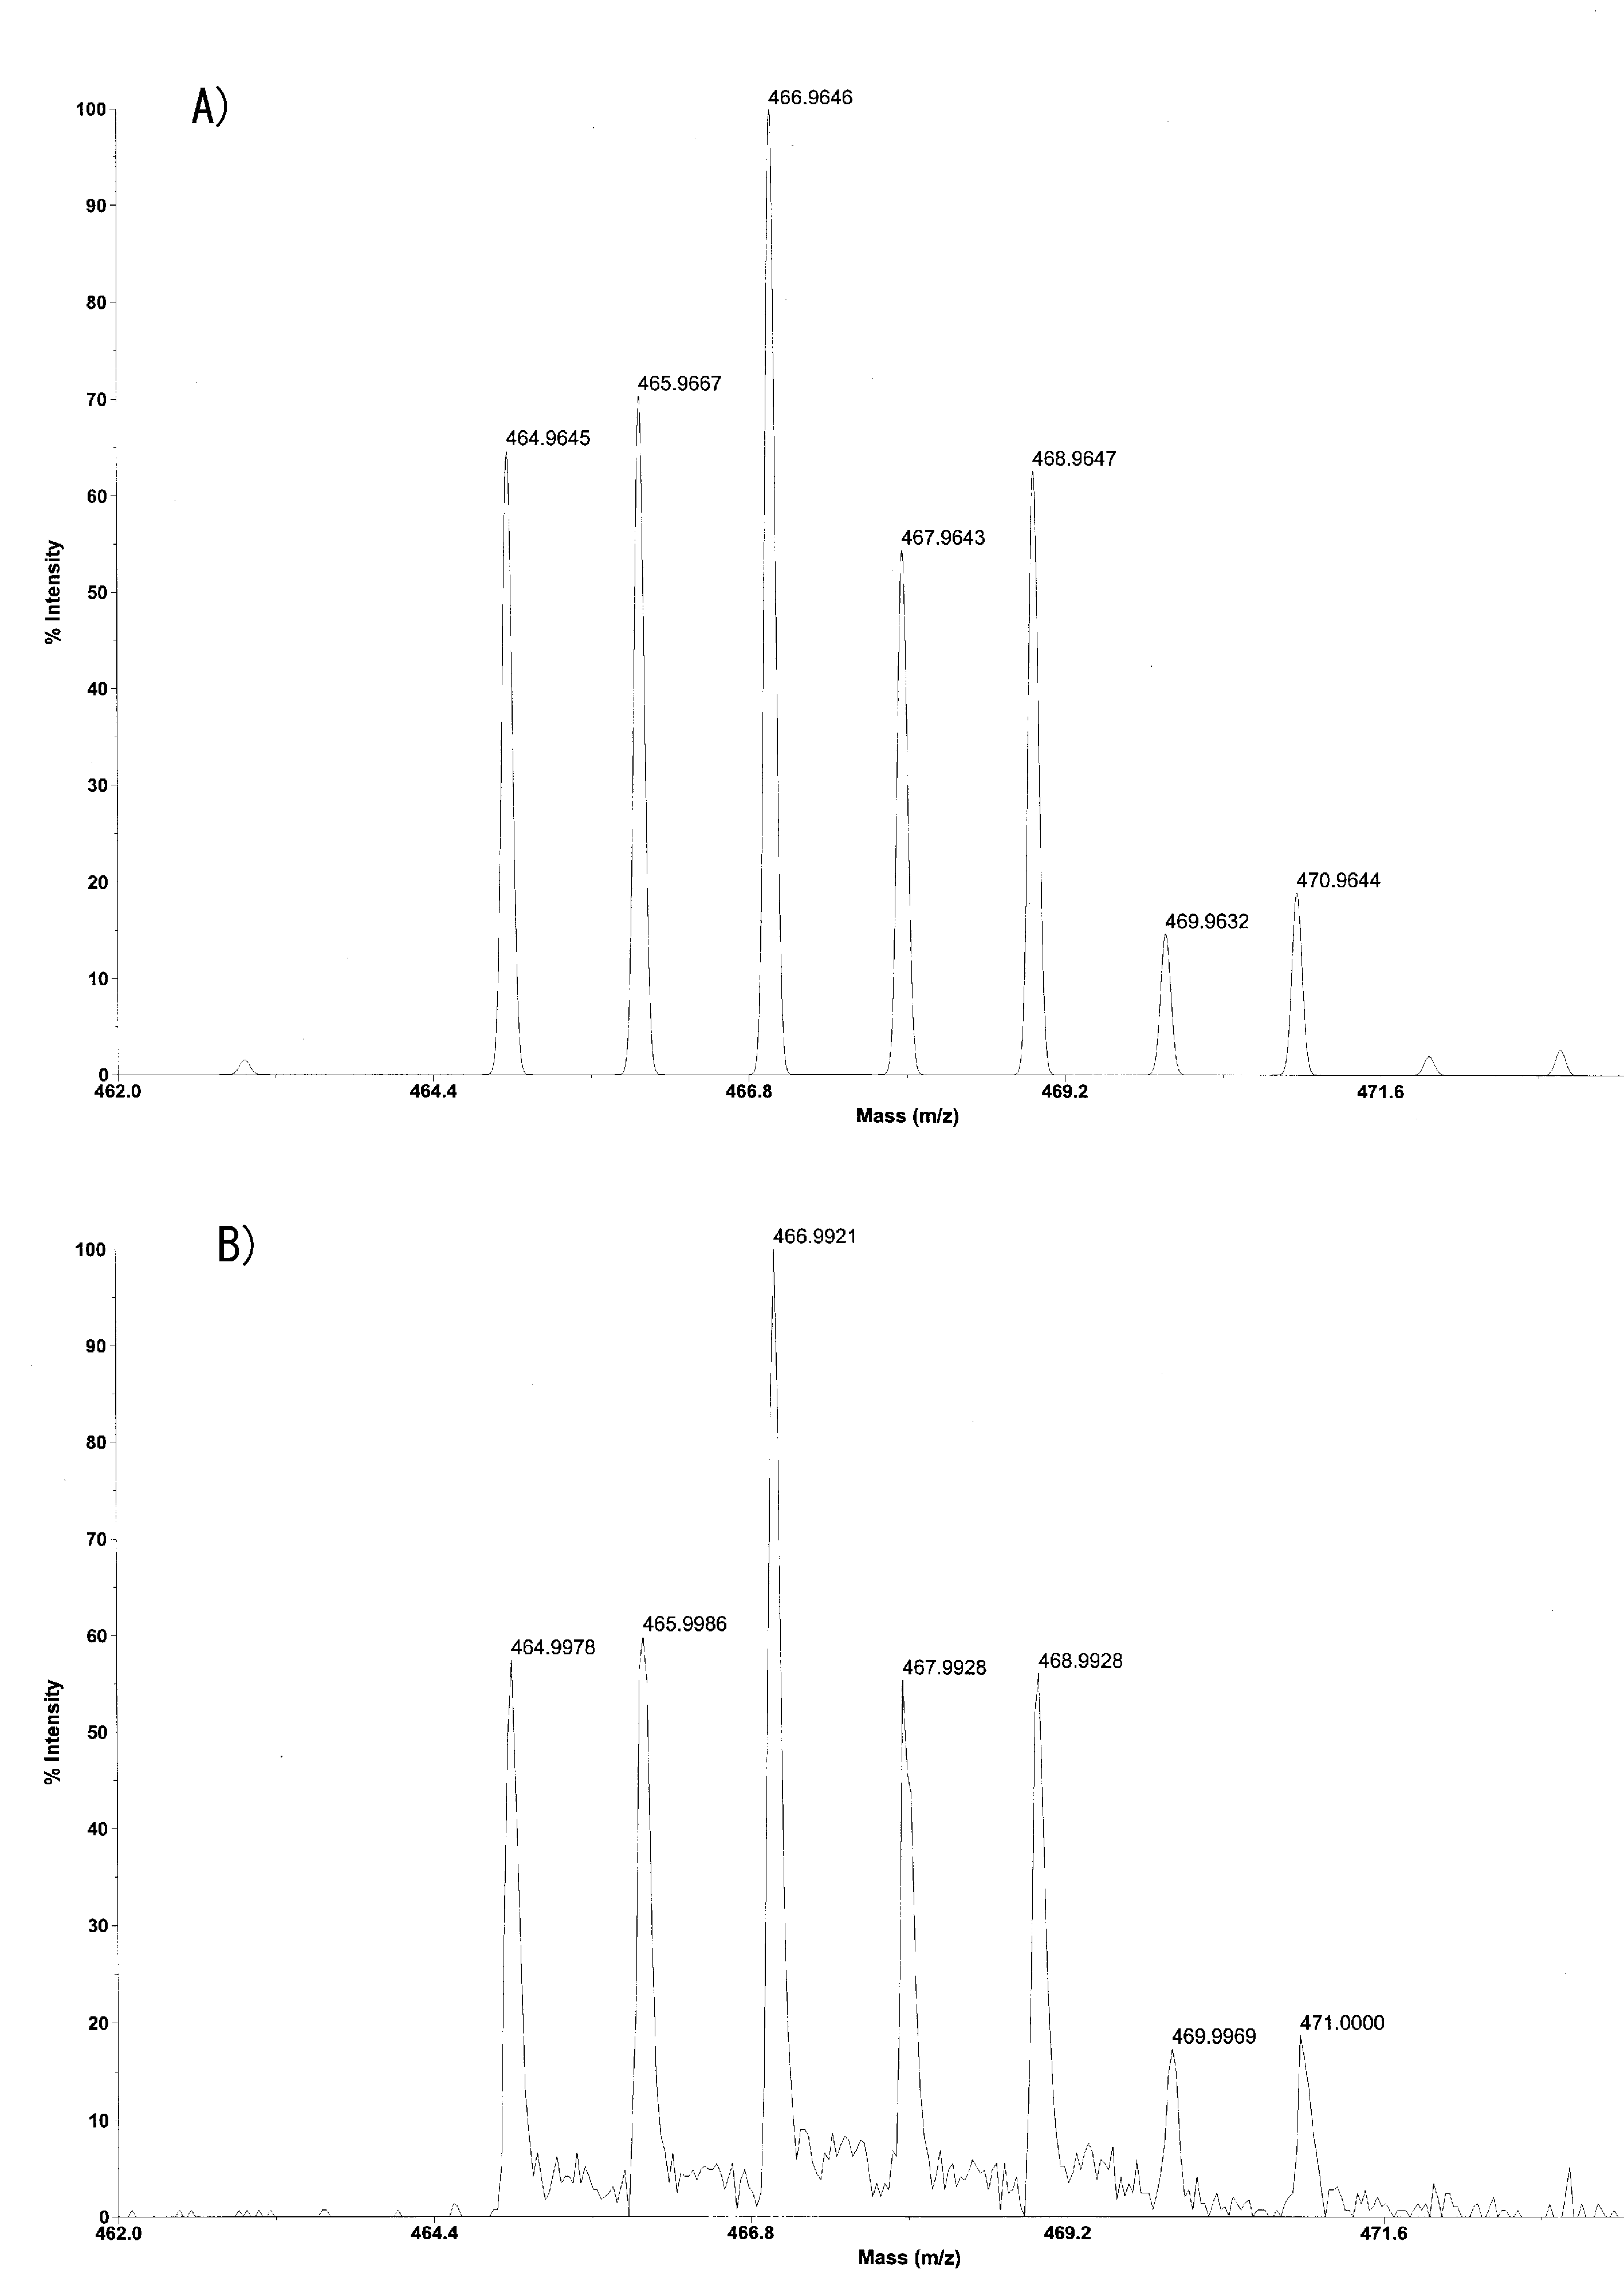


Figure S18.Simulated mass spectrum for C6H14Cl2N2O3PtK (A) and observed ESI mass spectrum of **4** (B).


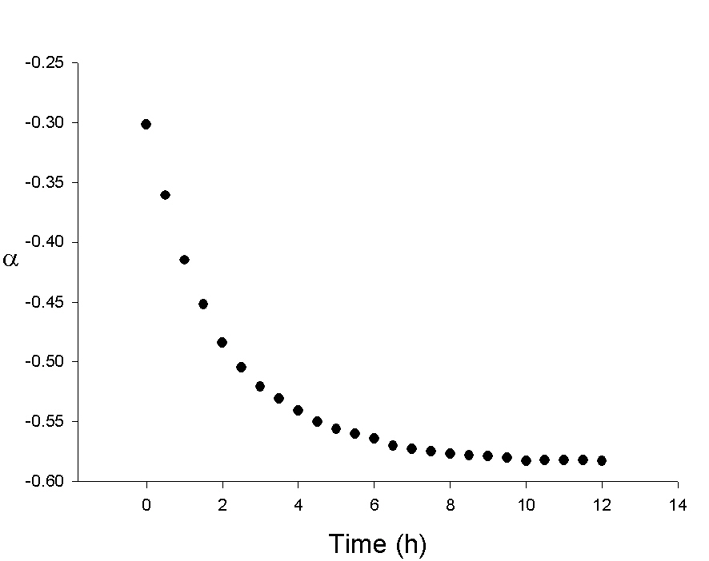


Figure S19. Time course of optical rotation () for the Pt (II) complex formation for **1**.

Figure S20. Time course of 1H NMR spectra for the Pt (II) complex formation for **1** in NaOAc-*d*3 buffer (pH 7.0) at 0 h (a), 0.5 h (b), 2 h (c), and 12 h (d).


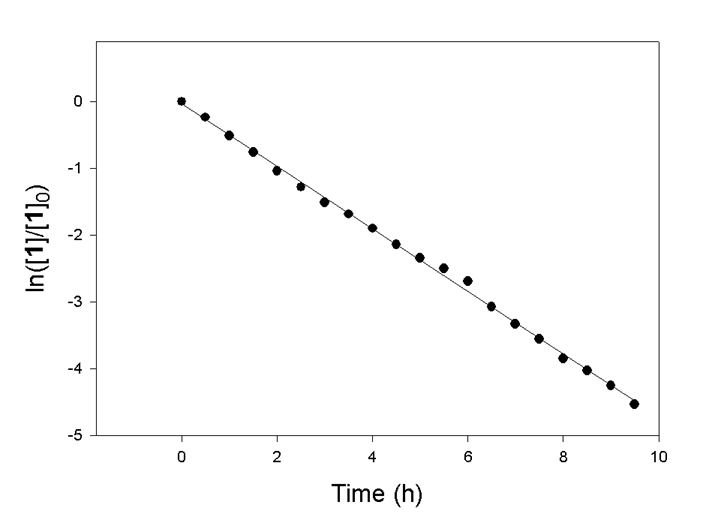


Figure S21. First-order kinetics fitting plot for the Pt (II) complex formation for **1**. (ln ([**1**]/[**1**]0) = –0.4684*t* – 0.0379; *r*2 = 0.9983)


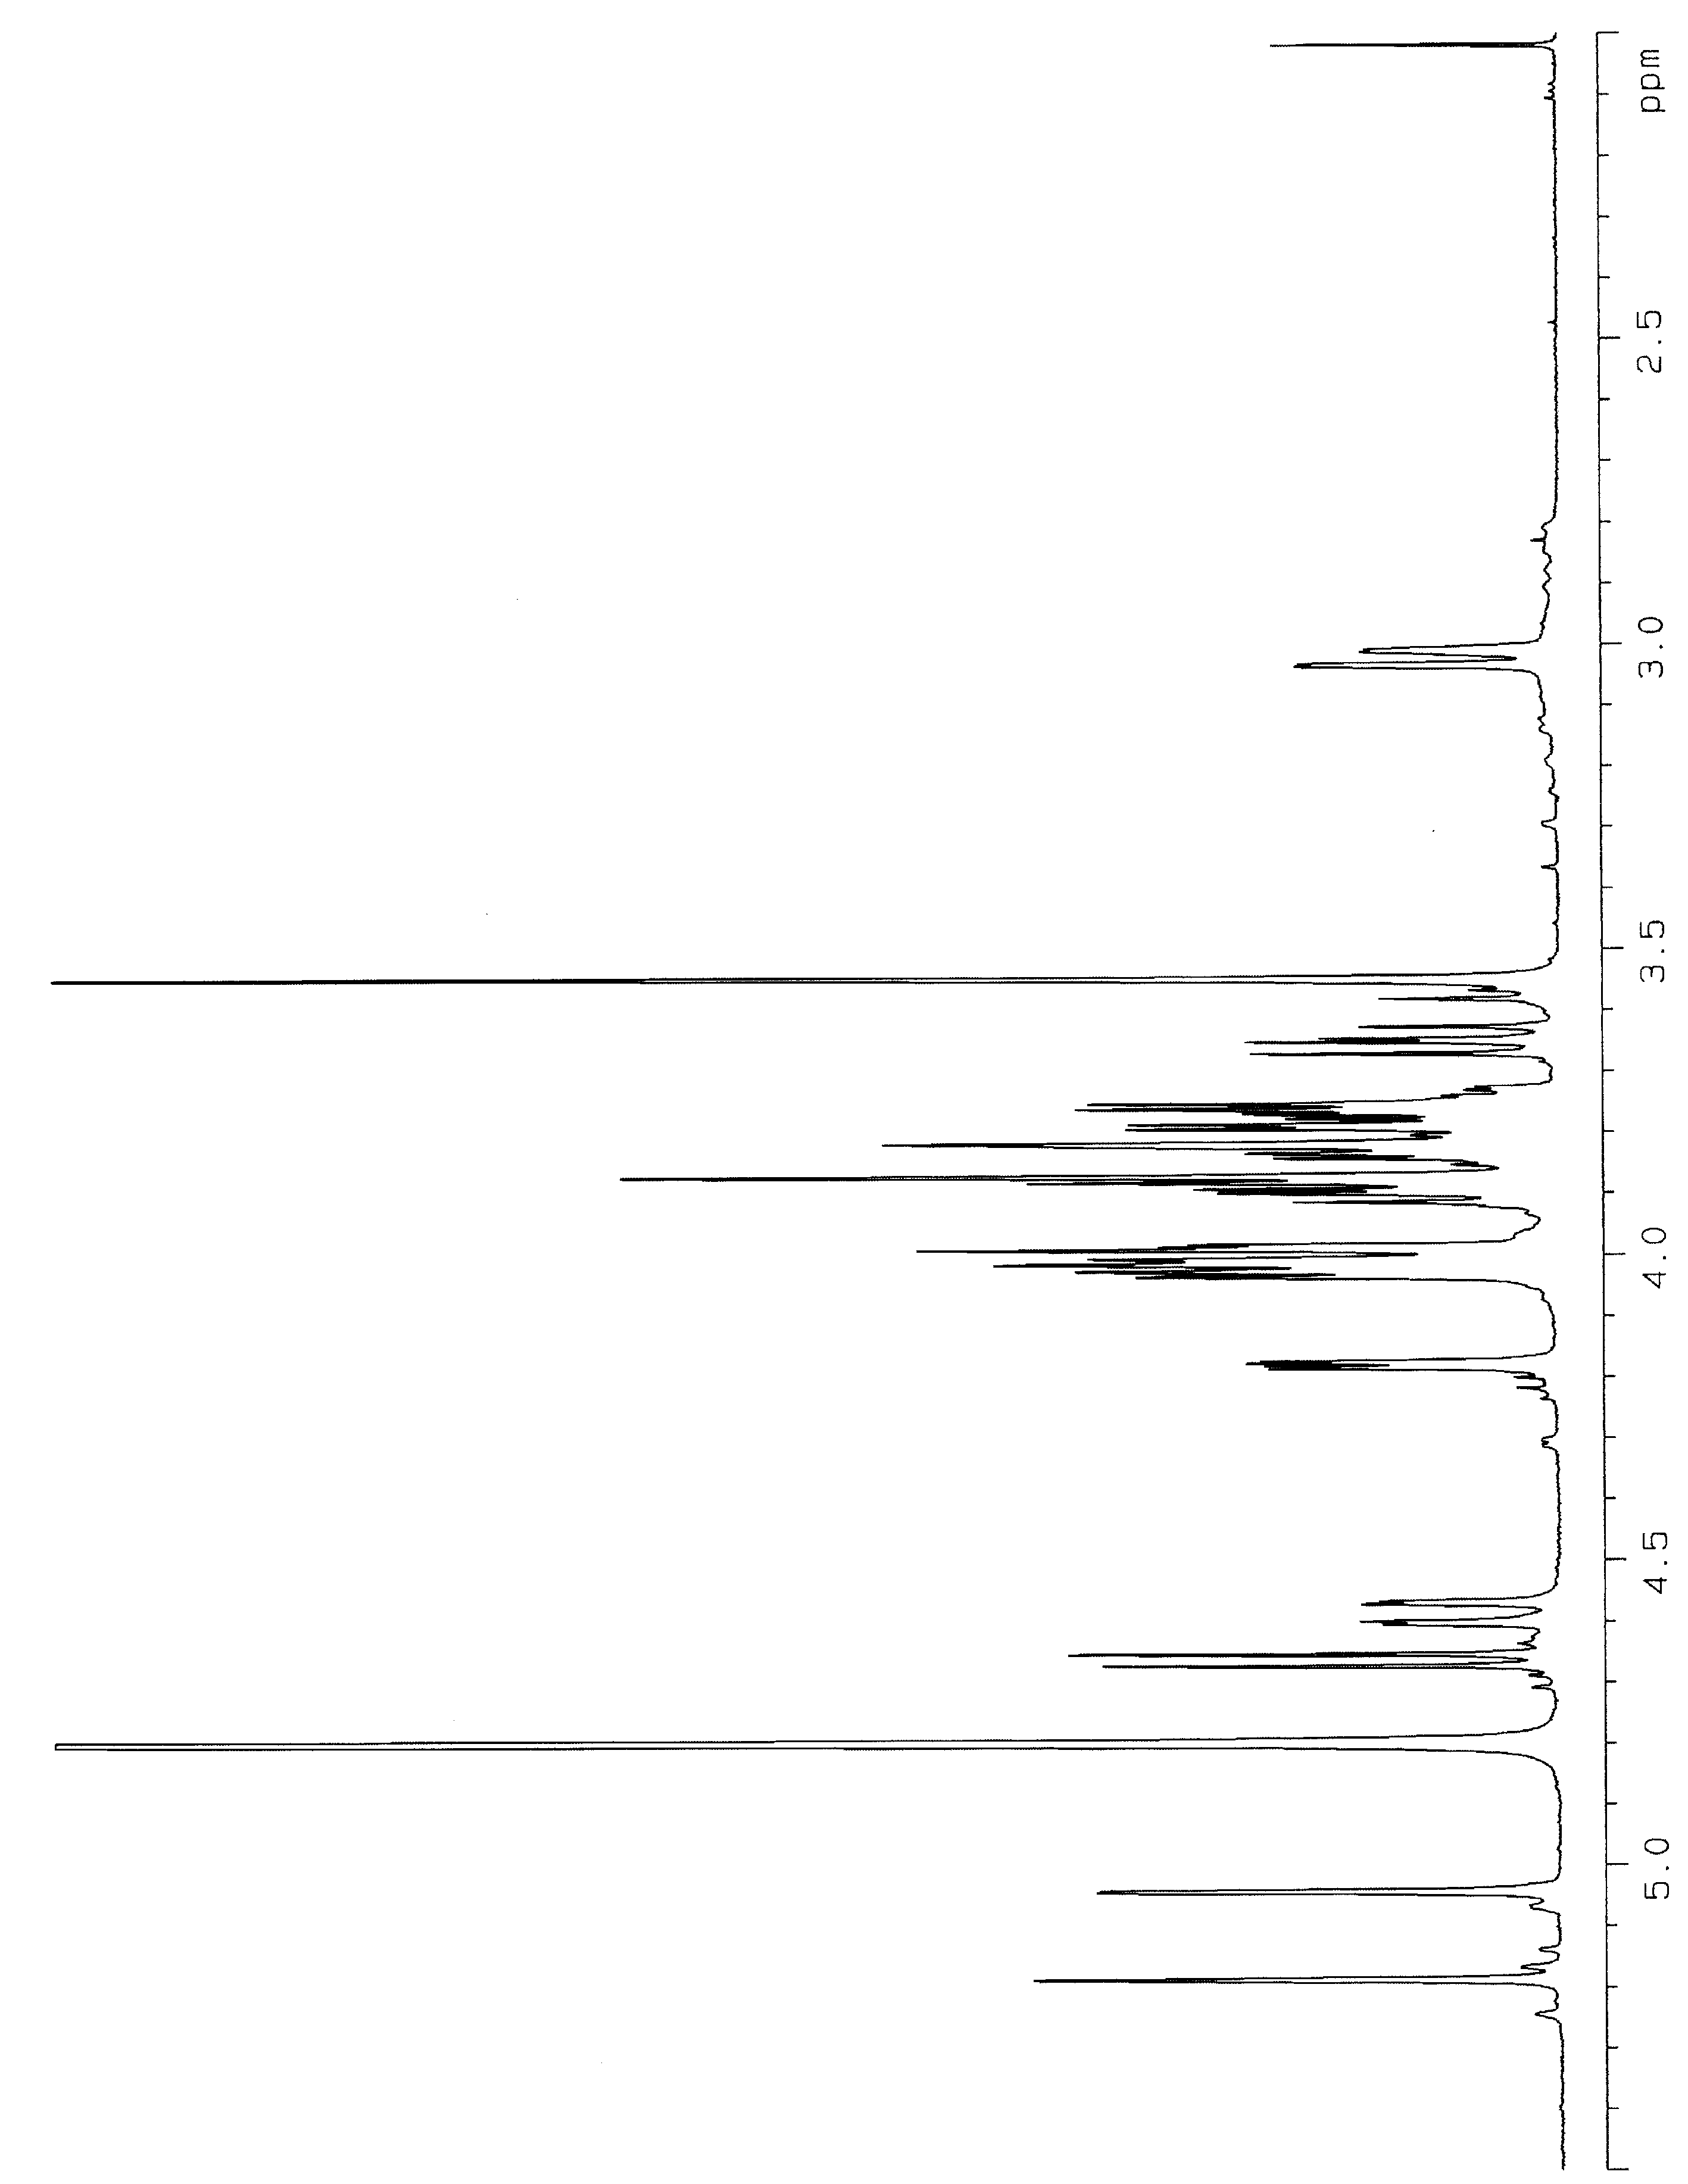


Figure S22. 1H NMR spectrum of **6** in D2O.


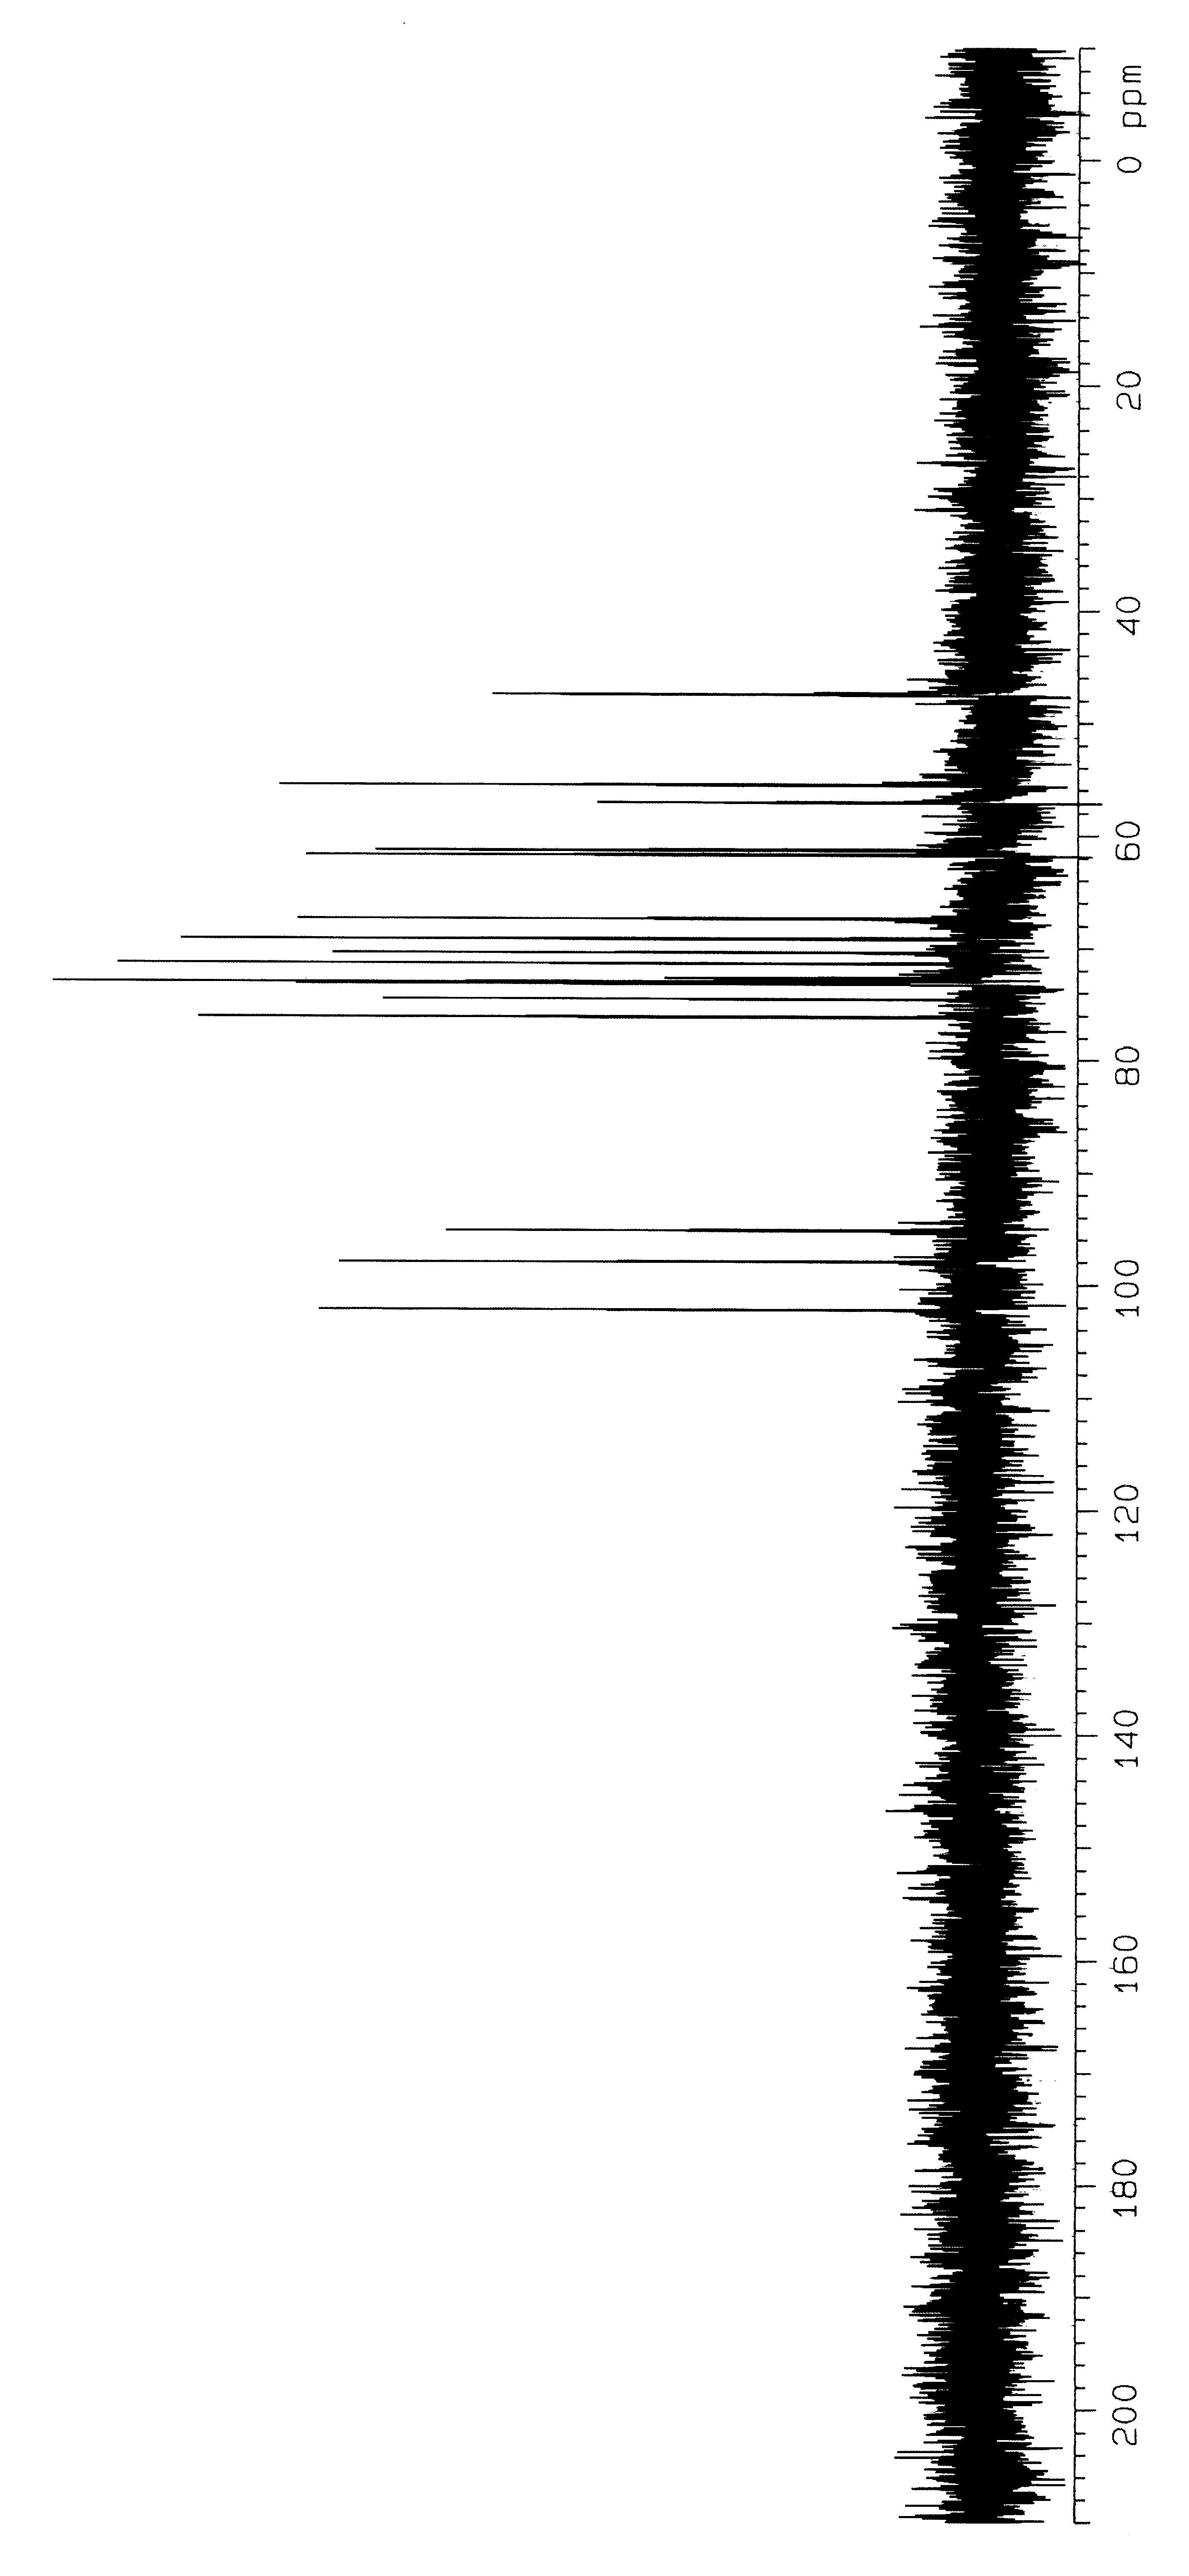


Figure S23. 13C NMR spectrum of **6** in D2O.


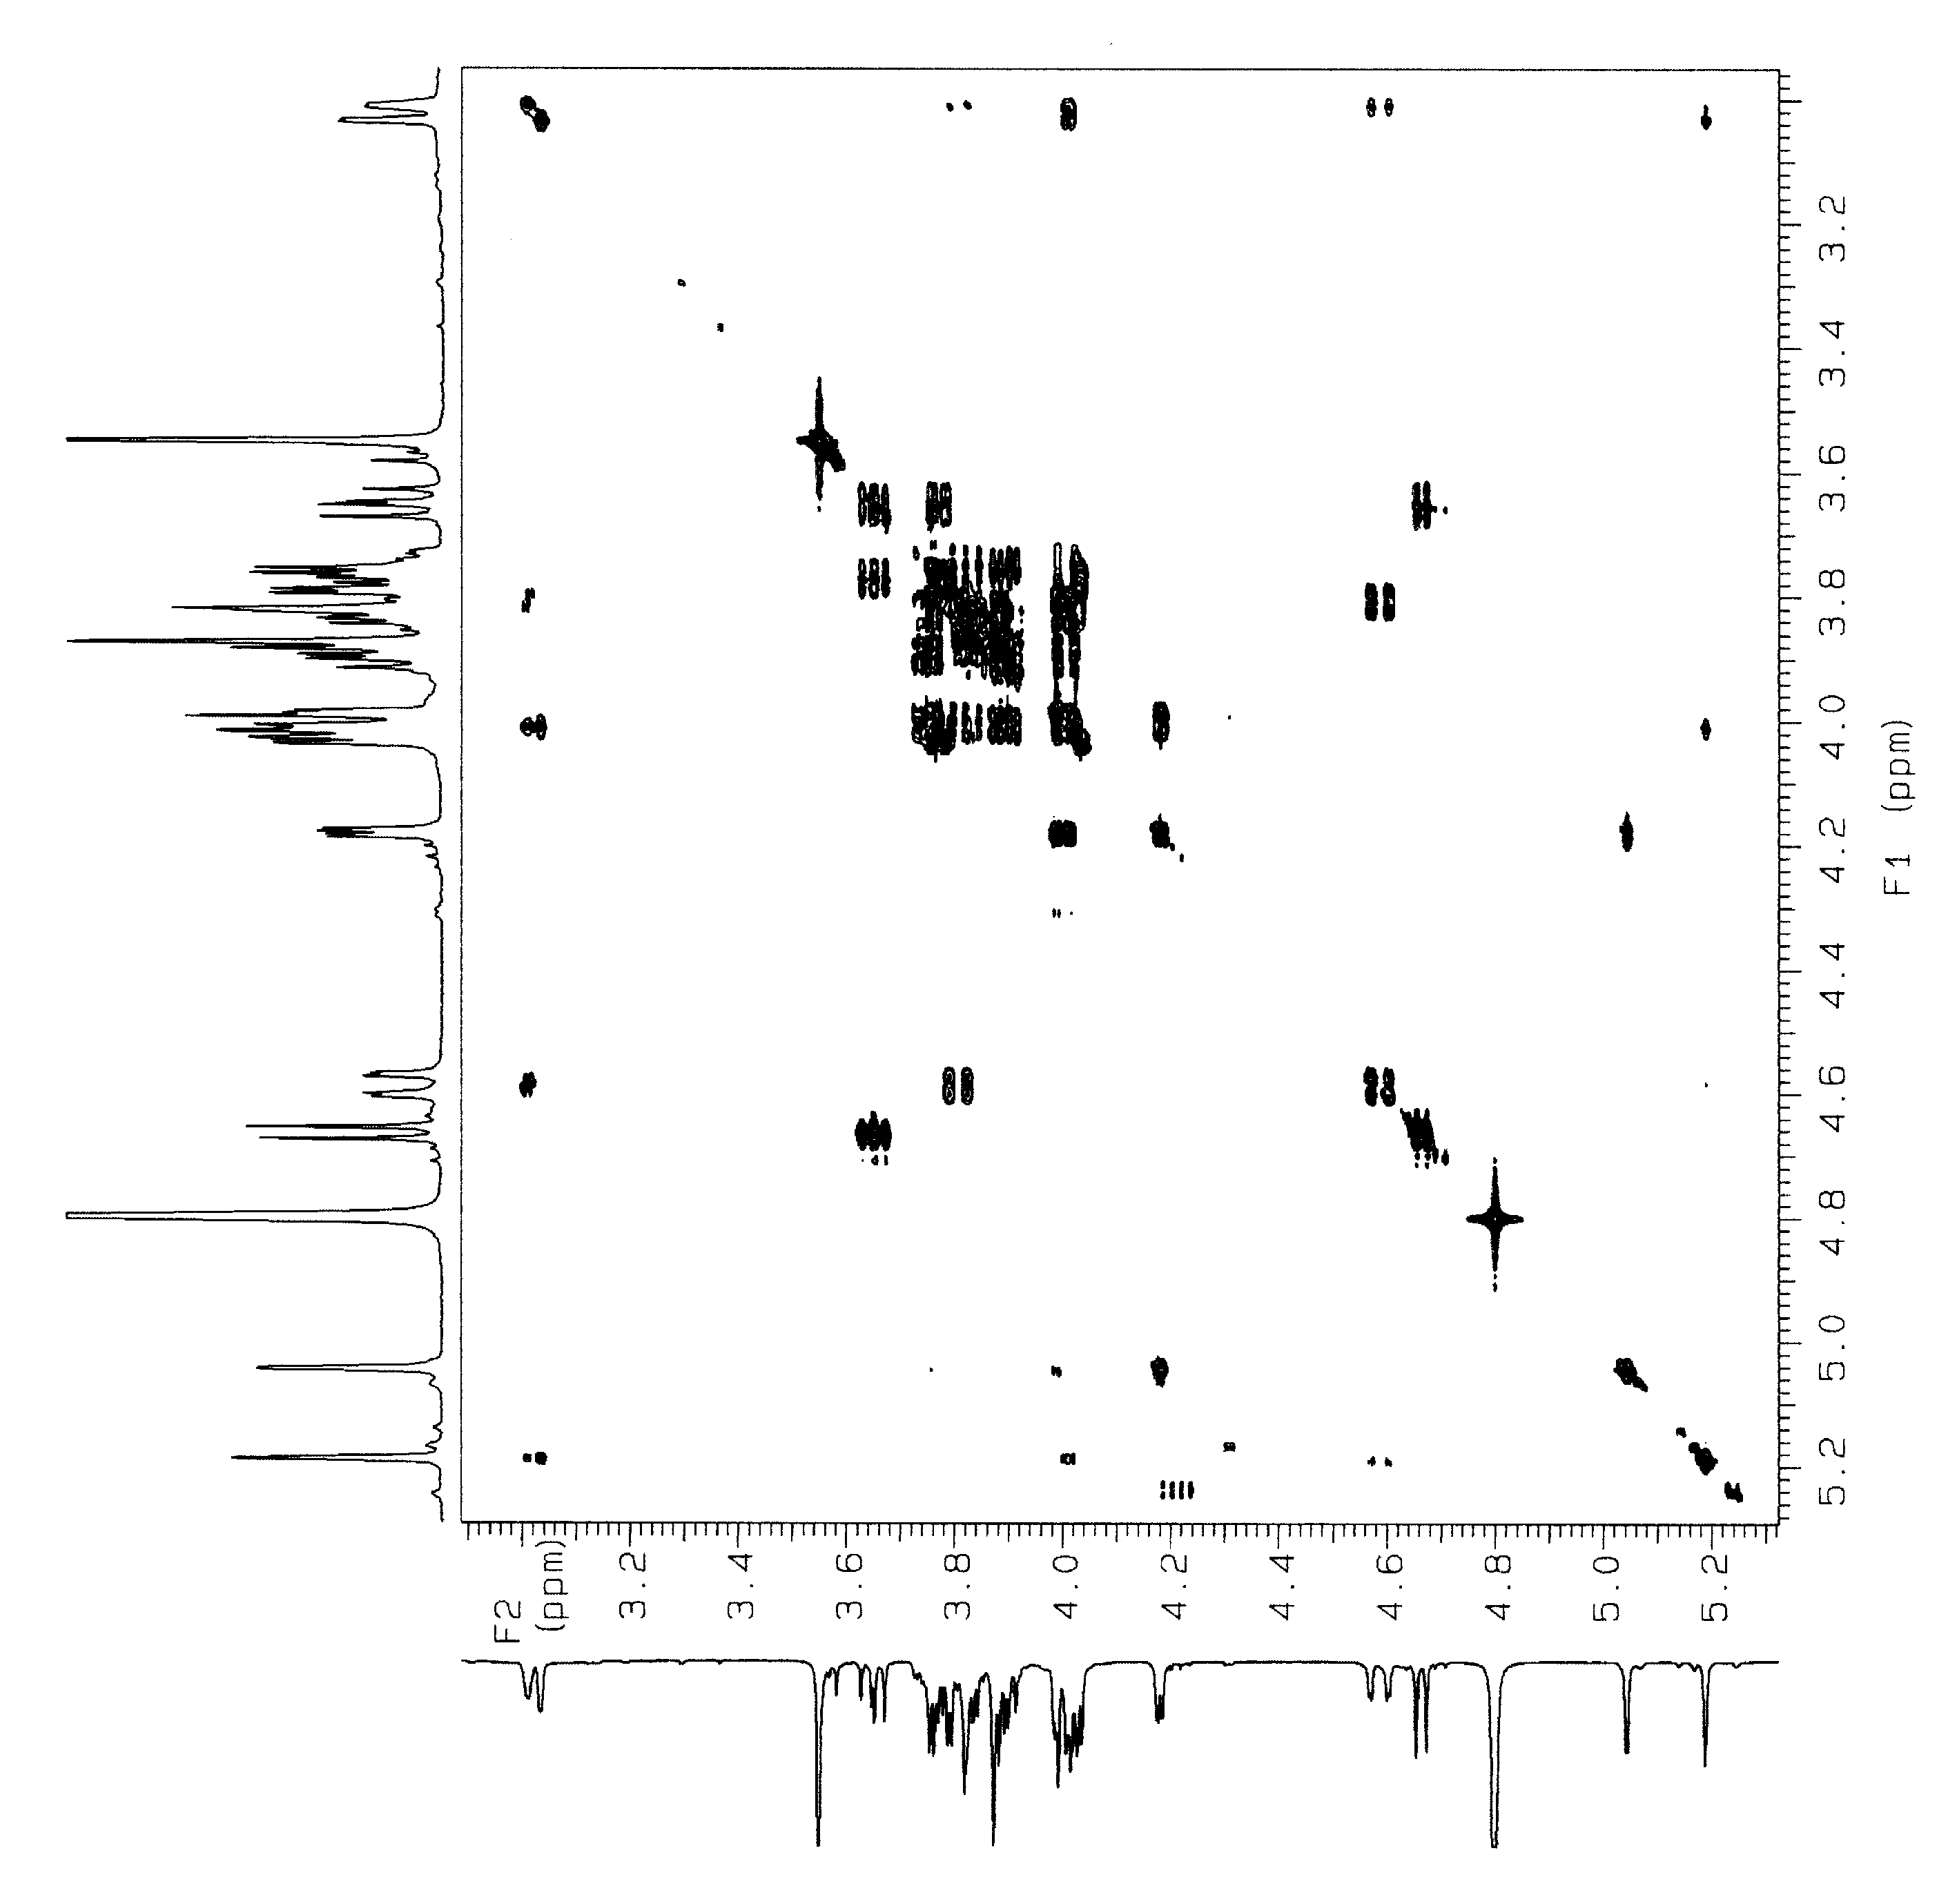


Figure S24. COSY spectrum of **6** in D2O.


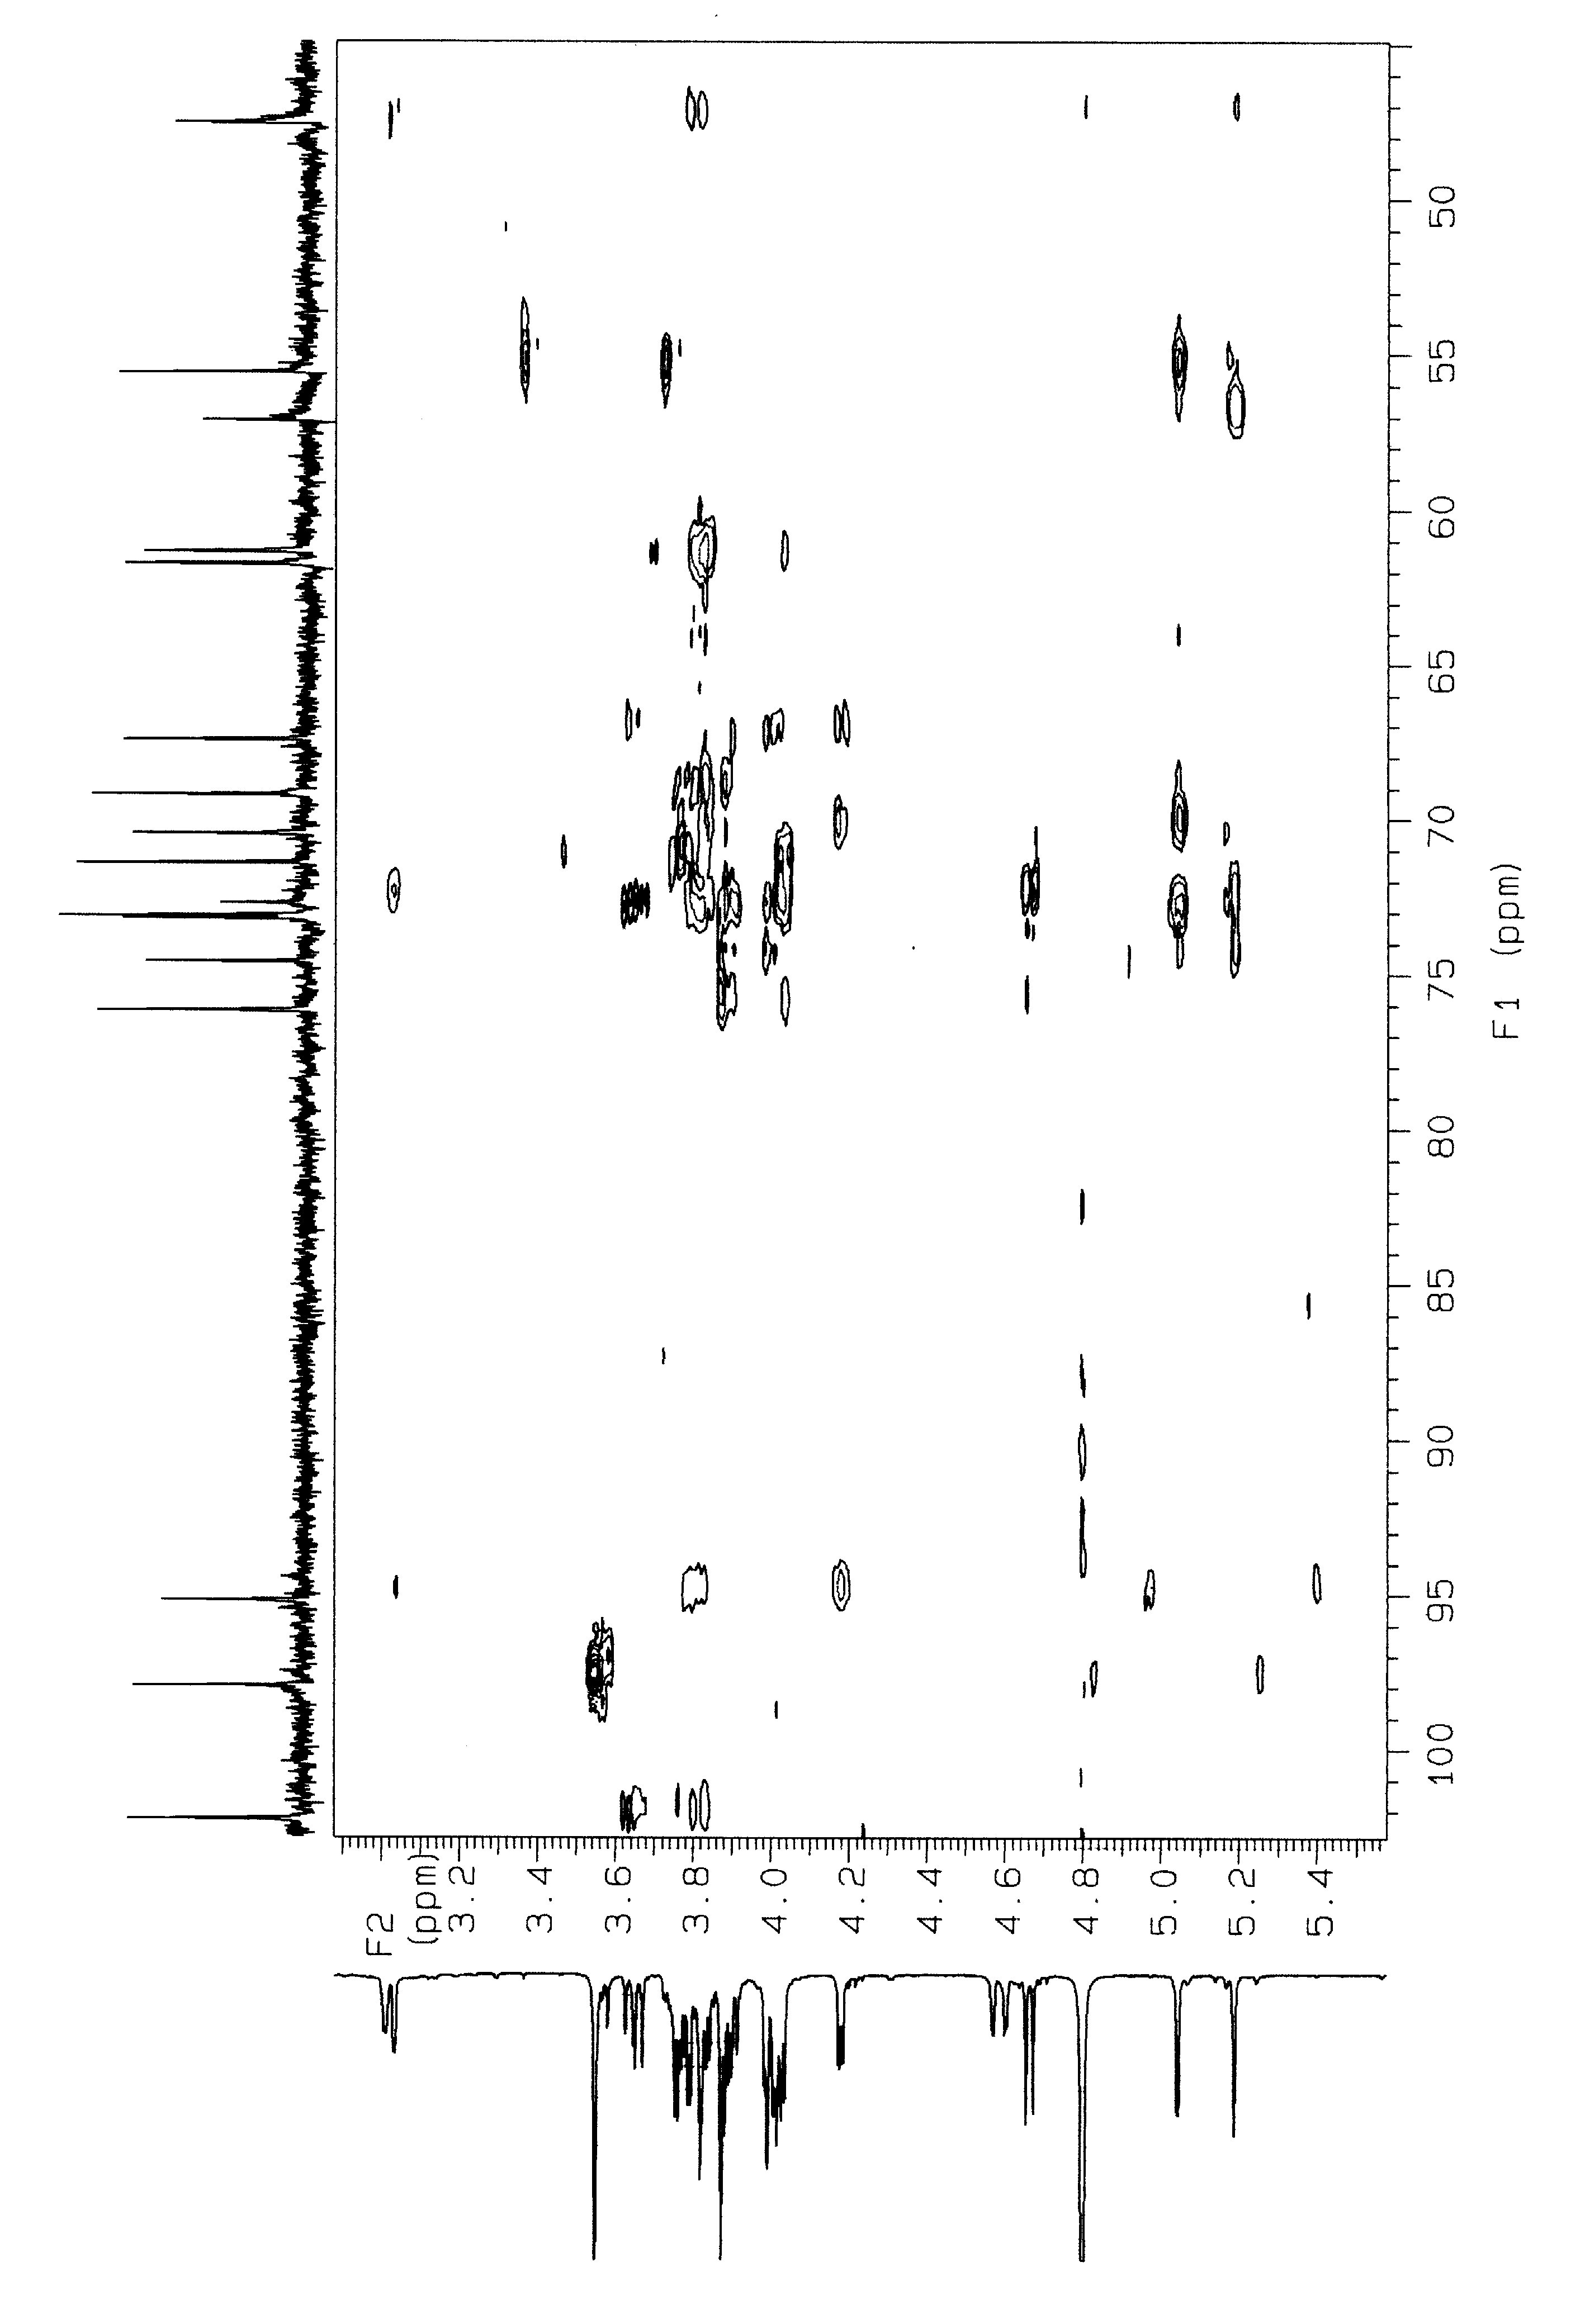


Figure S25. HMQC spectrum of **6** in D2O.


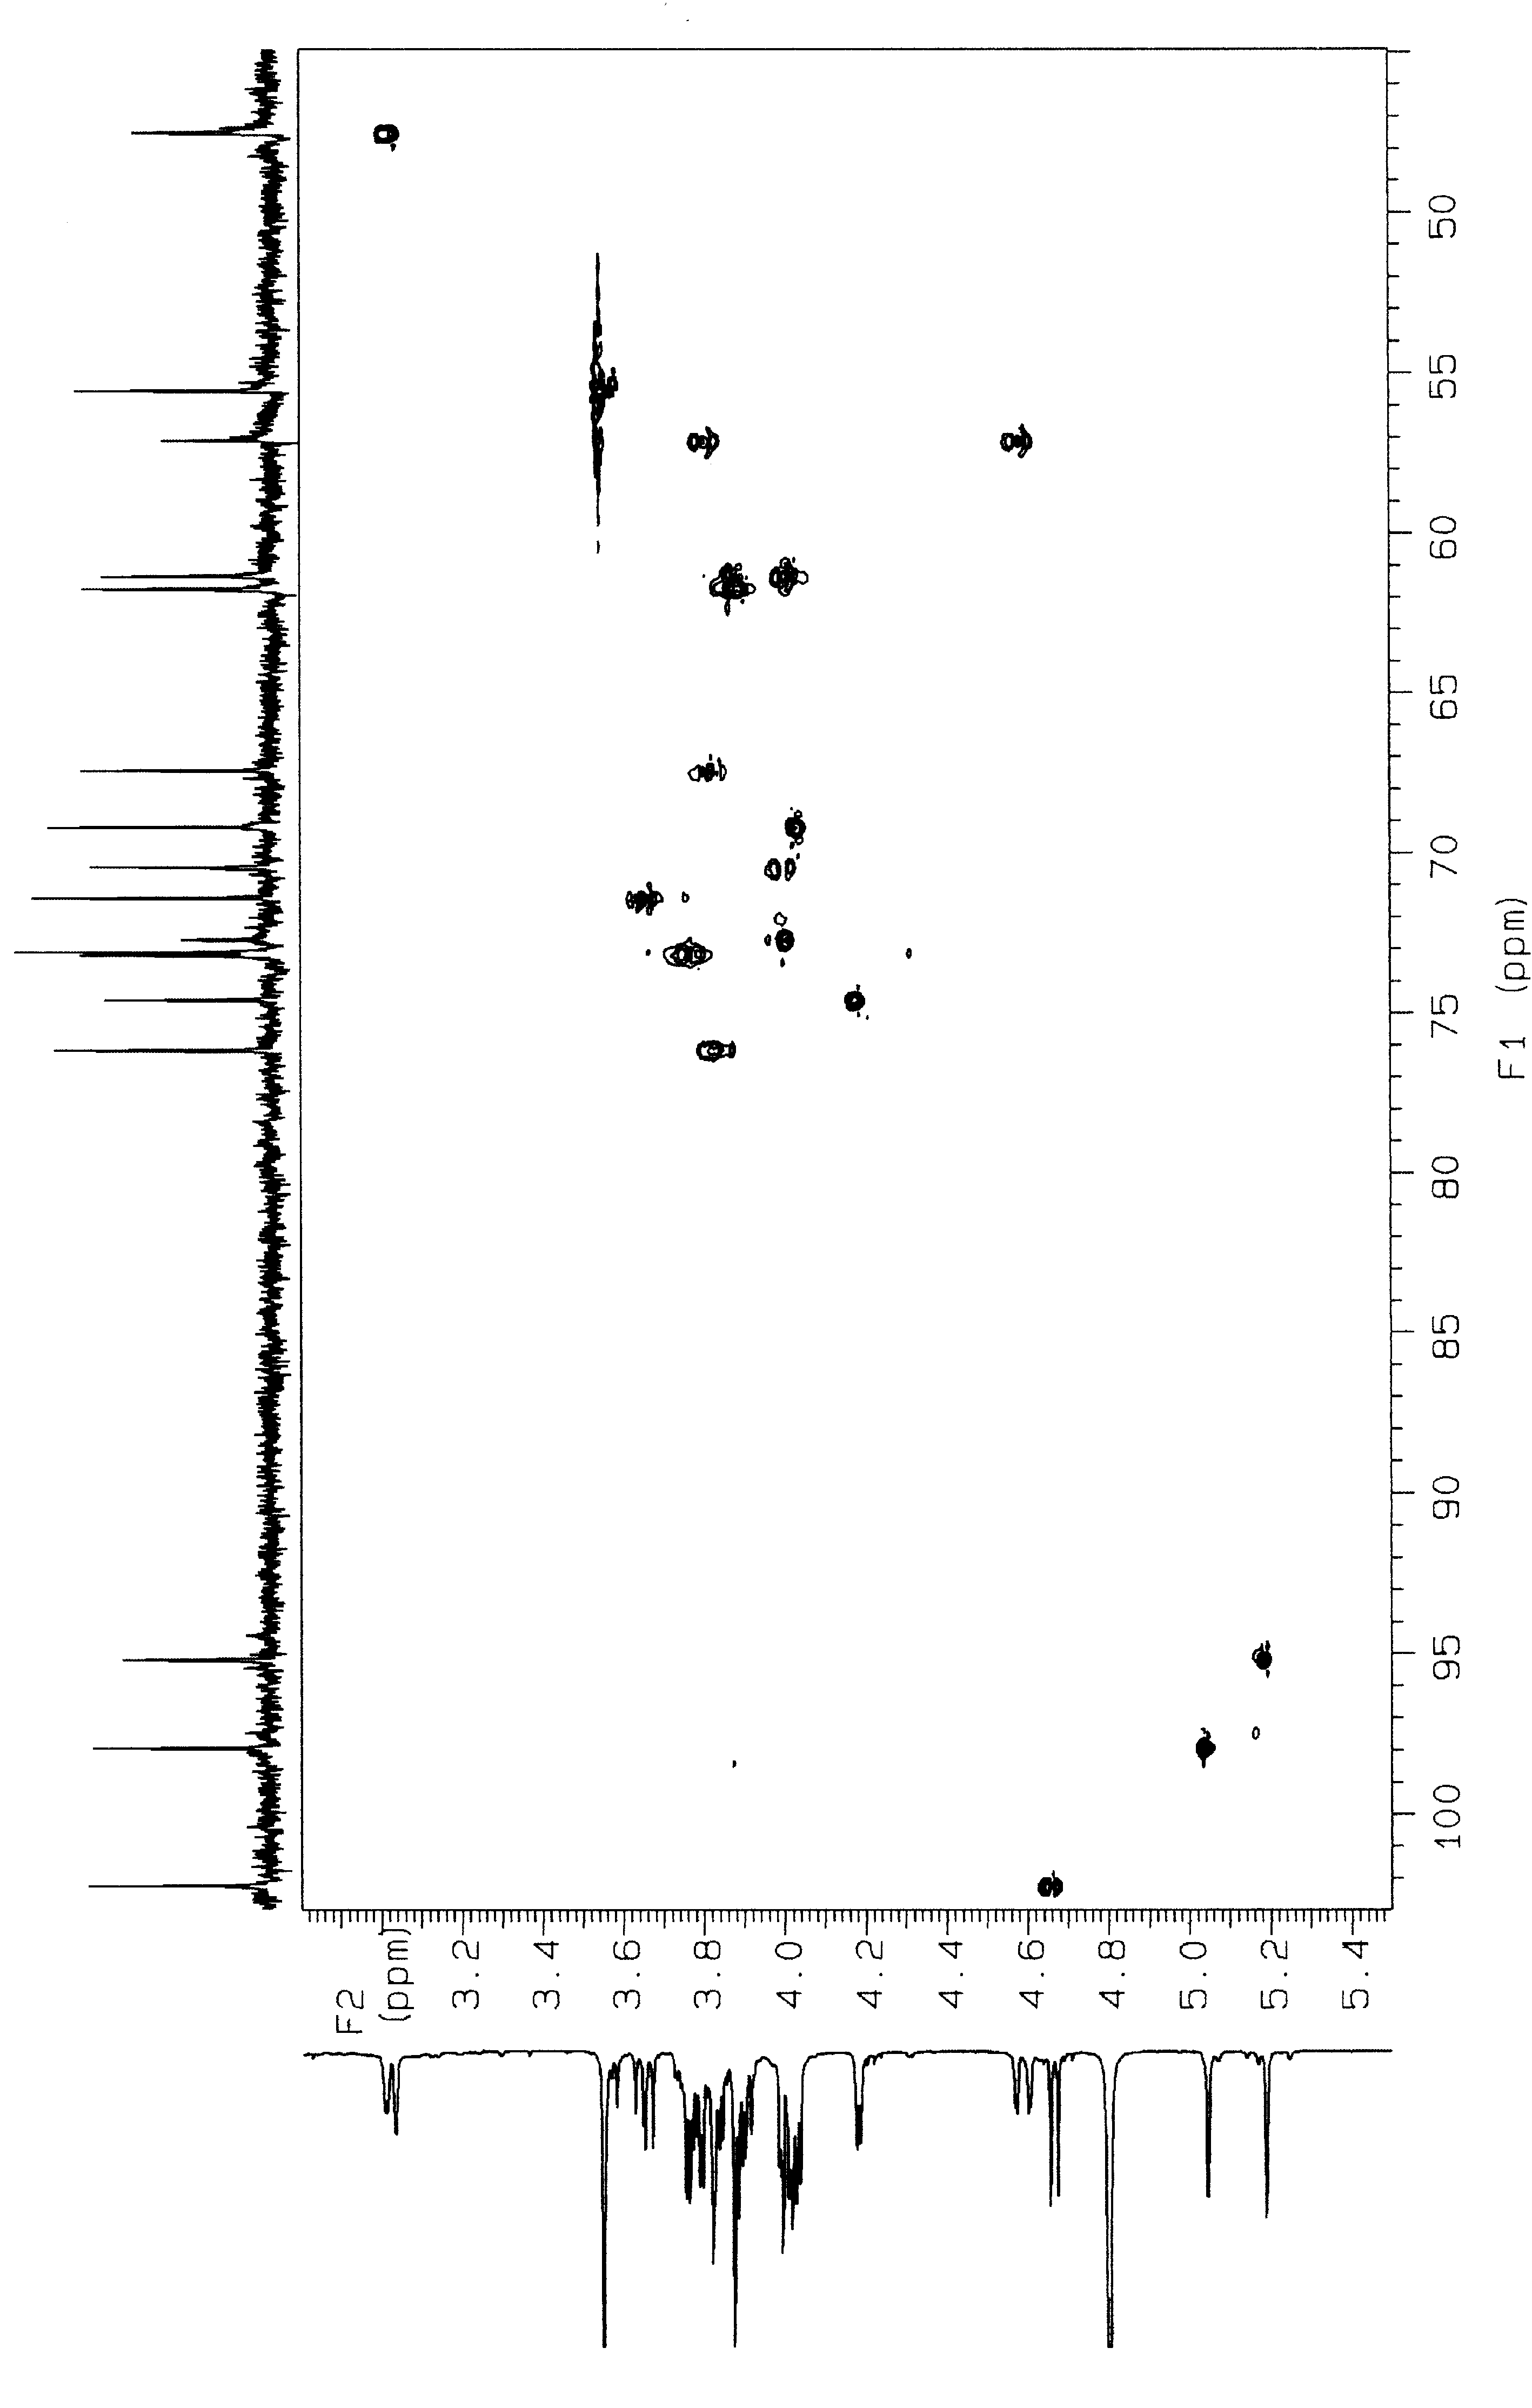


Figure S26. HMBC spectrum of **6** in D2O.


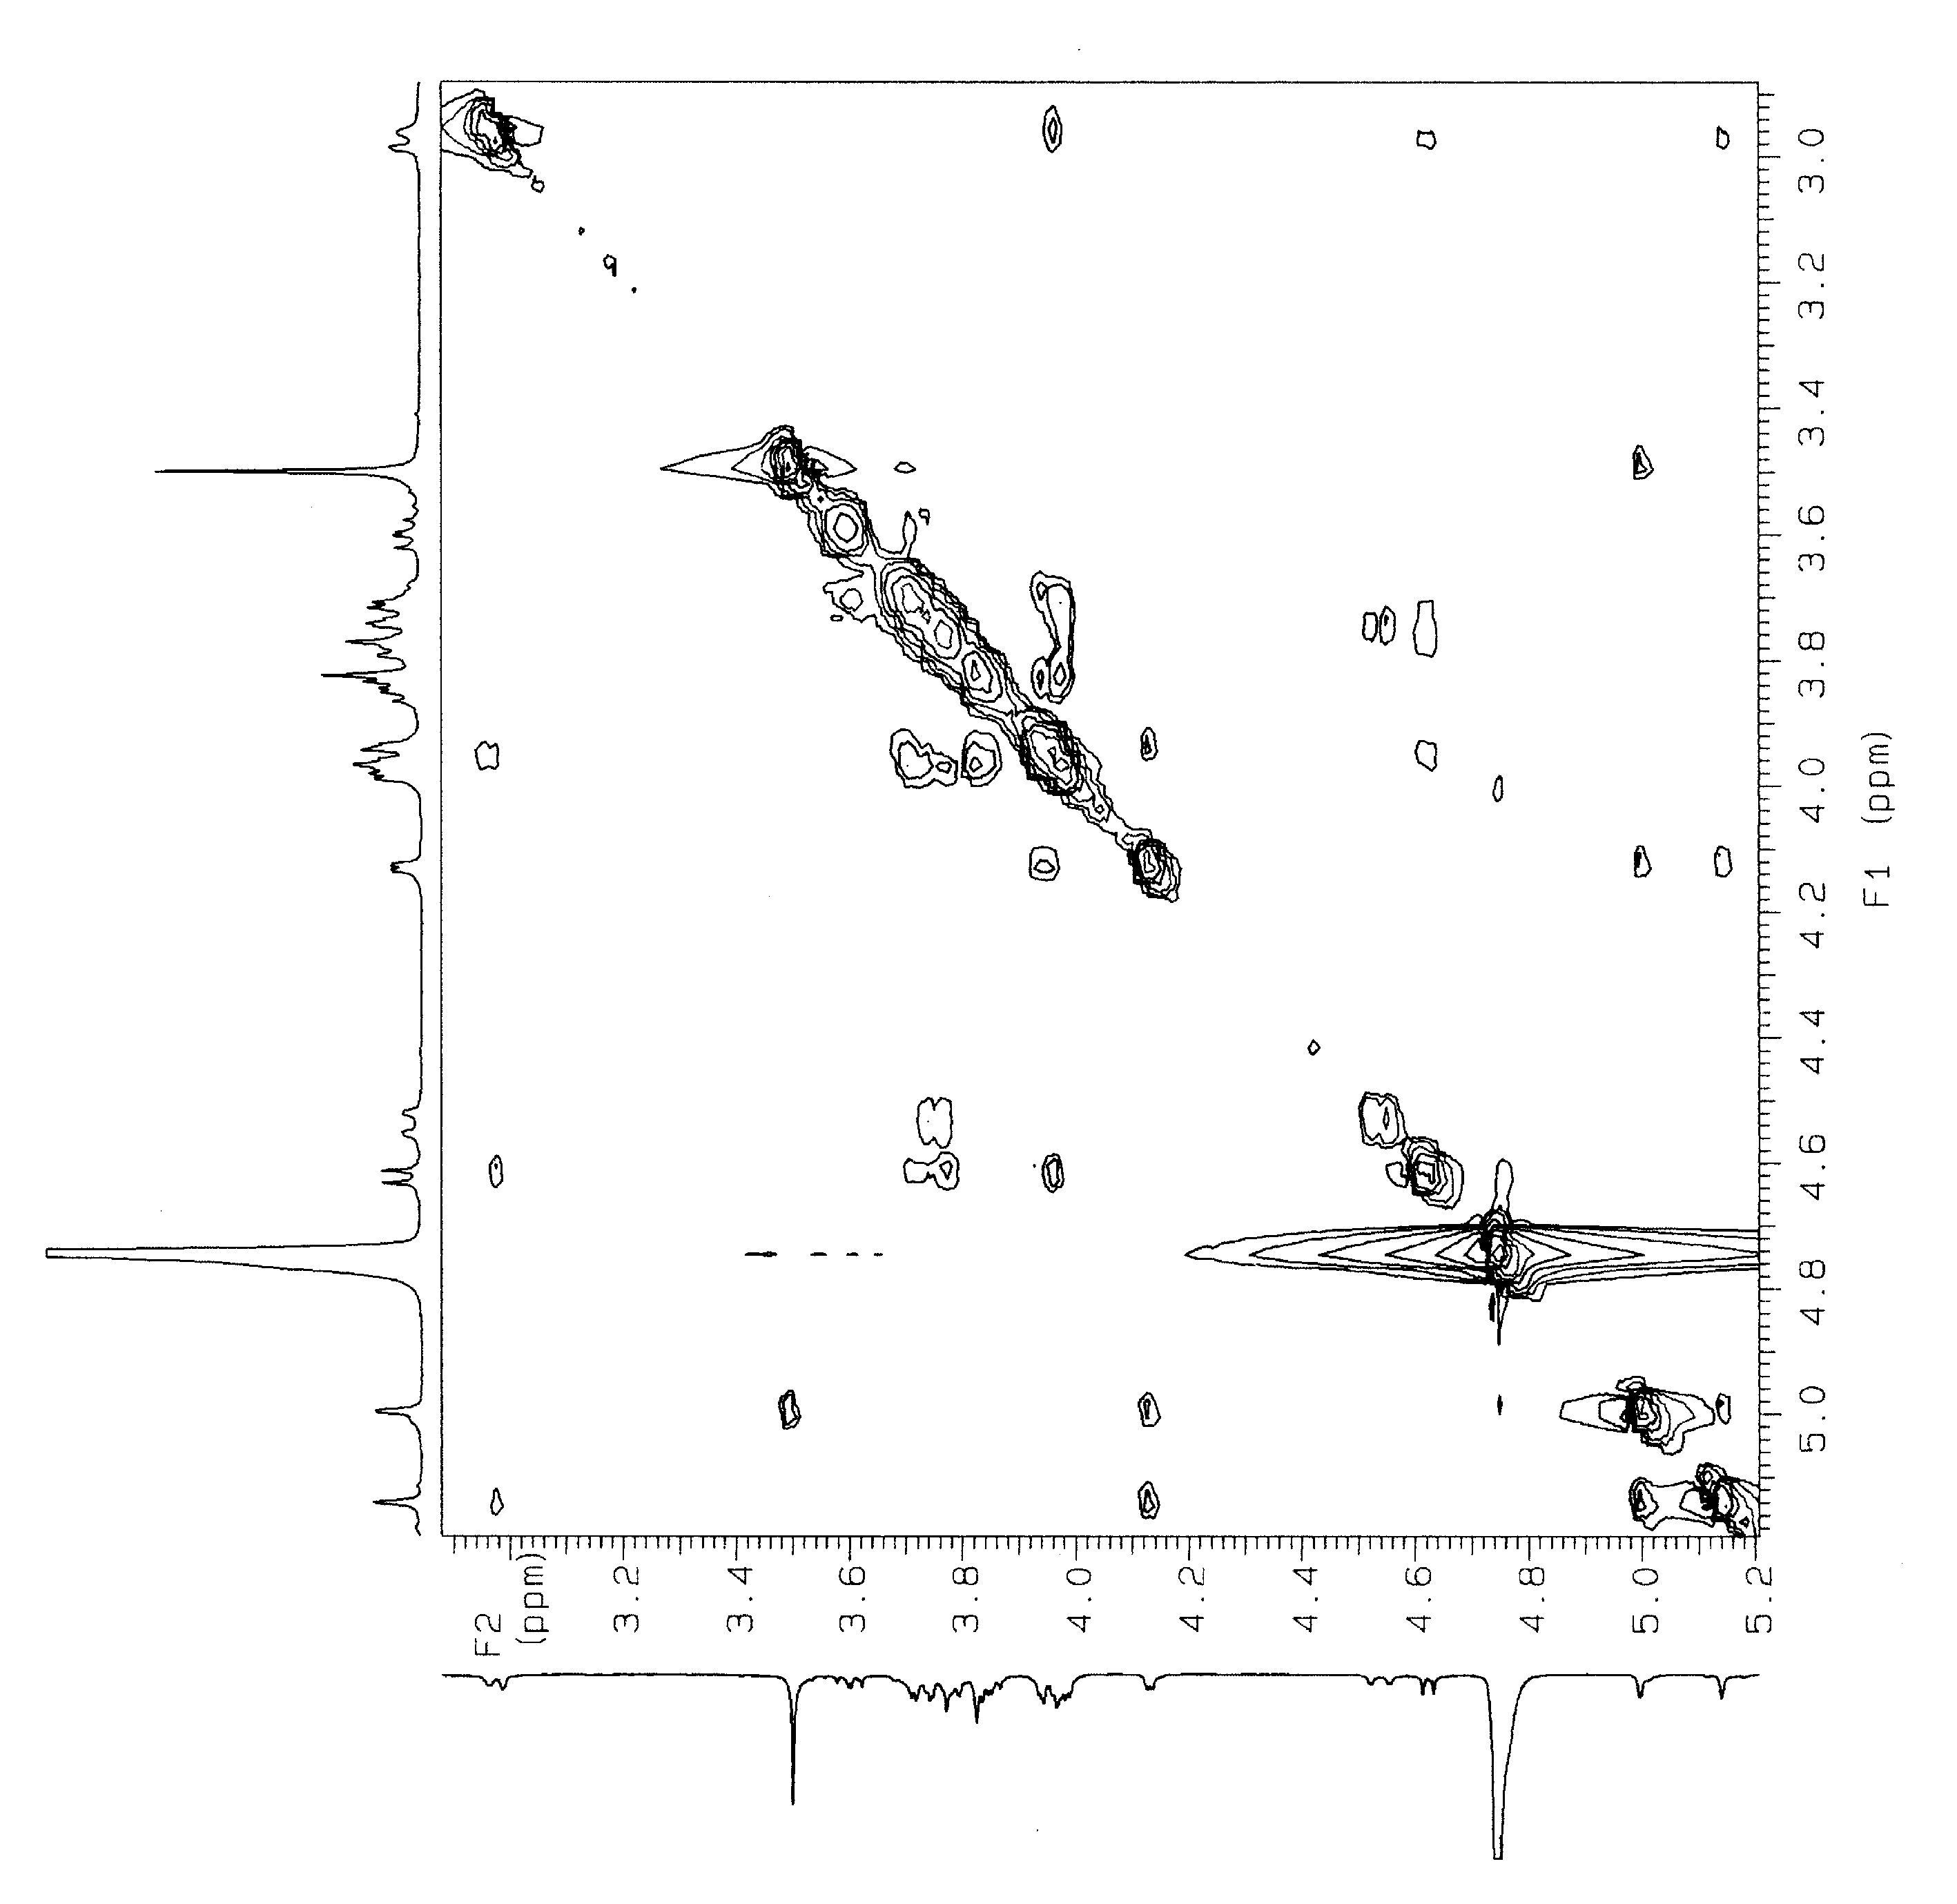


Figure S27. HMBC spectrum of **6** in D2O.

Figure S28. 1D NOESY and 1D TOCSY spectra for **6** in D2O. Reference 1H NMR spectrum (a), 1D NOESY spectrum with 1” irradiated (b), and 1D TOCSY with 5a’ irradiated (c).


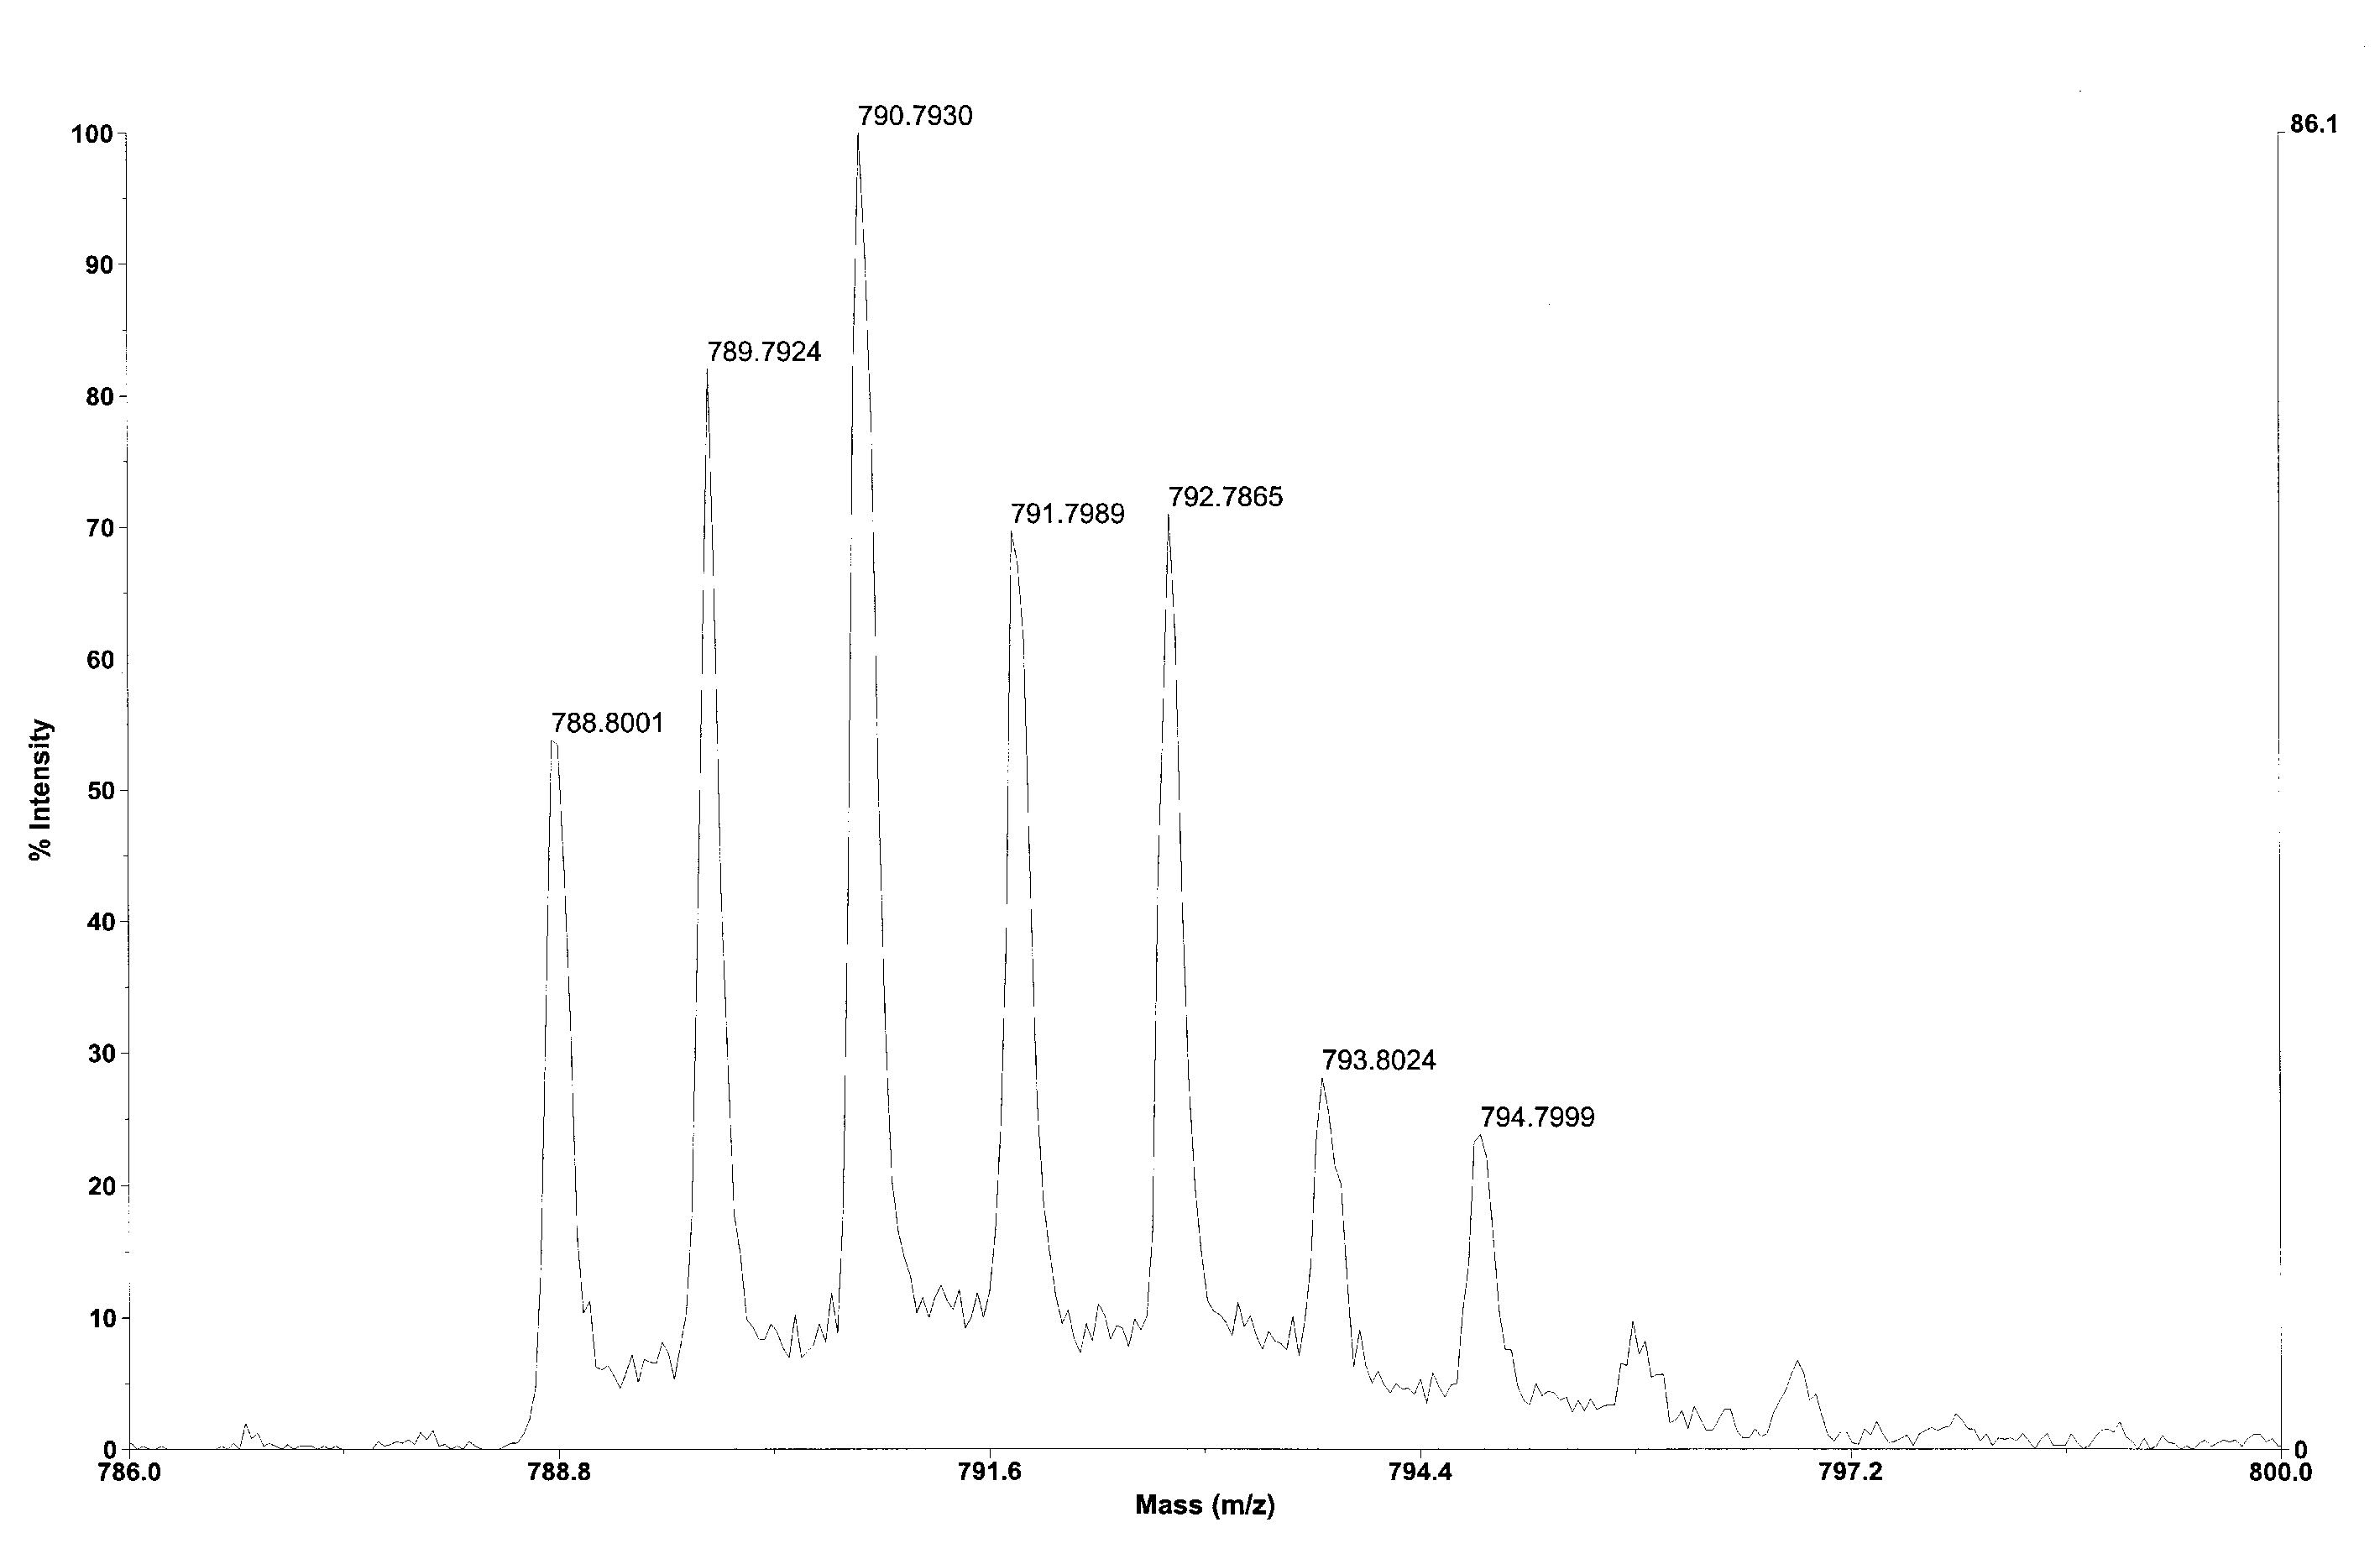


Figure S29.Observed ESI mass spectrum of **6**.


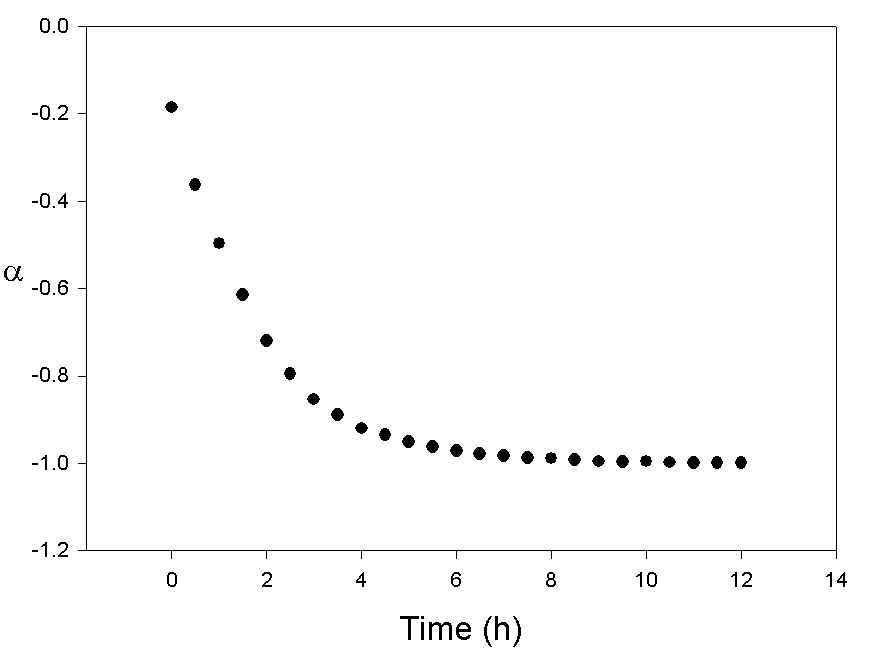


Figure S30. Time course of optical rotation () for the Pt (II) complex formation for **2**.


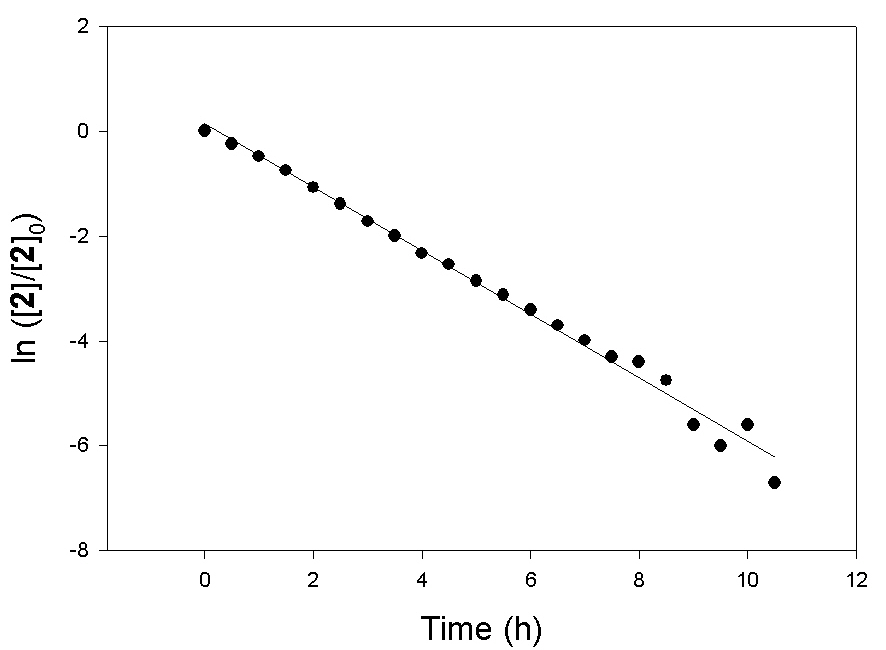


Figure S31. First-order kinetics fitting plot for the Pt (II) complex formation for **2**. (ln ([**2**]/[**2**]0) = –0.6065*t* – 0.1399; *r*2 = 0.9902)

Figure S32. Time course of 1H NMR spectra for the Pt (II) complex formation for 2-deoxystreptamine in NaOAc-*d*3 buffer (pH 7.0) at 0 h (a), 2 h (b), 8 h (c), and 24 h (d).

Figure S33. Time course of 1H NMR spectra for unchelation of the Pt (II) complex **4** in NaOAc-*d*3 buffer (pH 7.0) at 0 min (a), 10 min (b), 20 min (c), and 120 min (d).


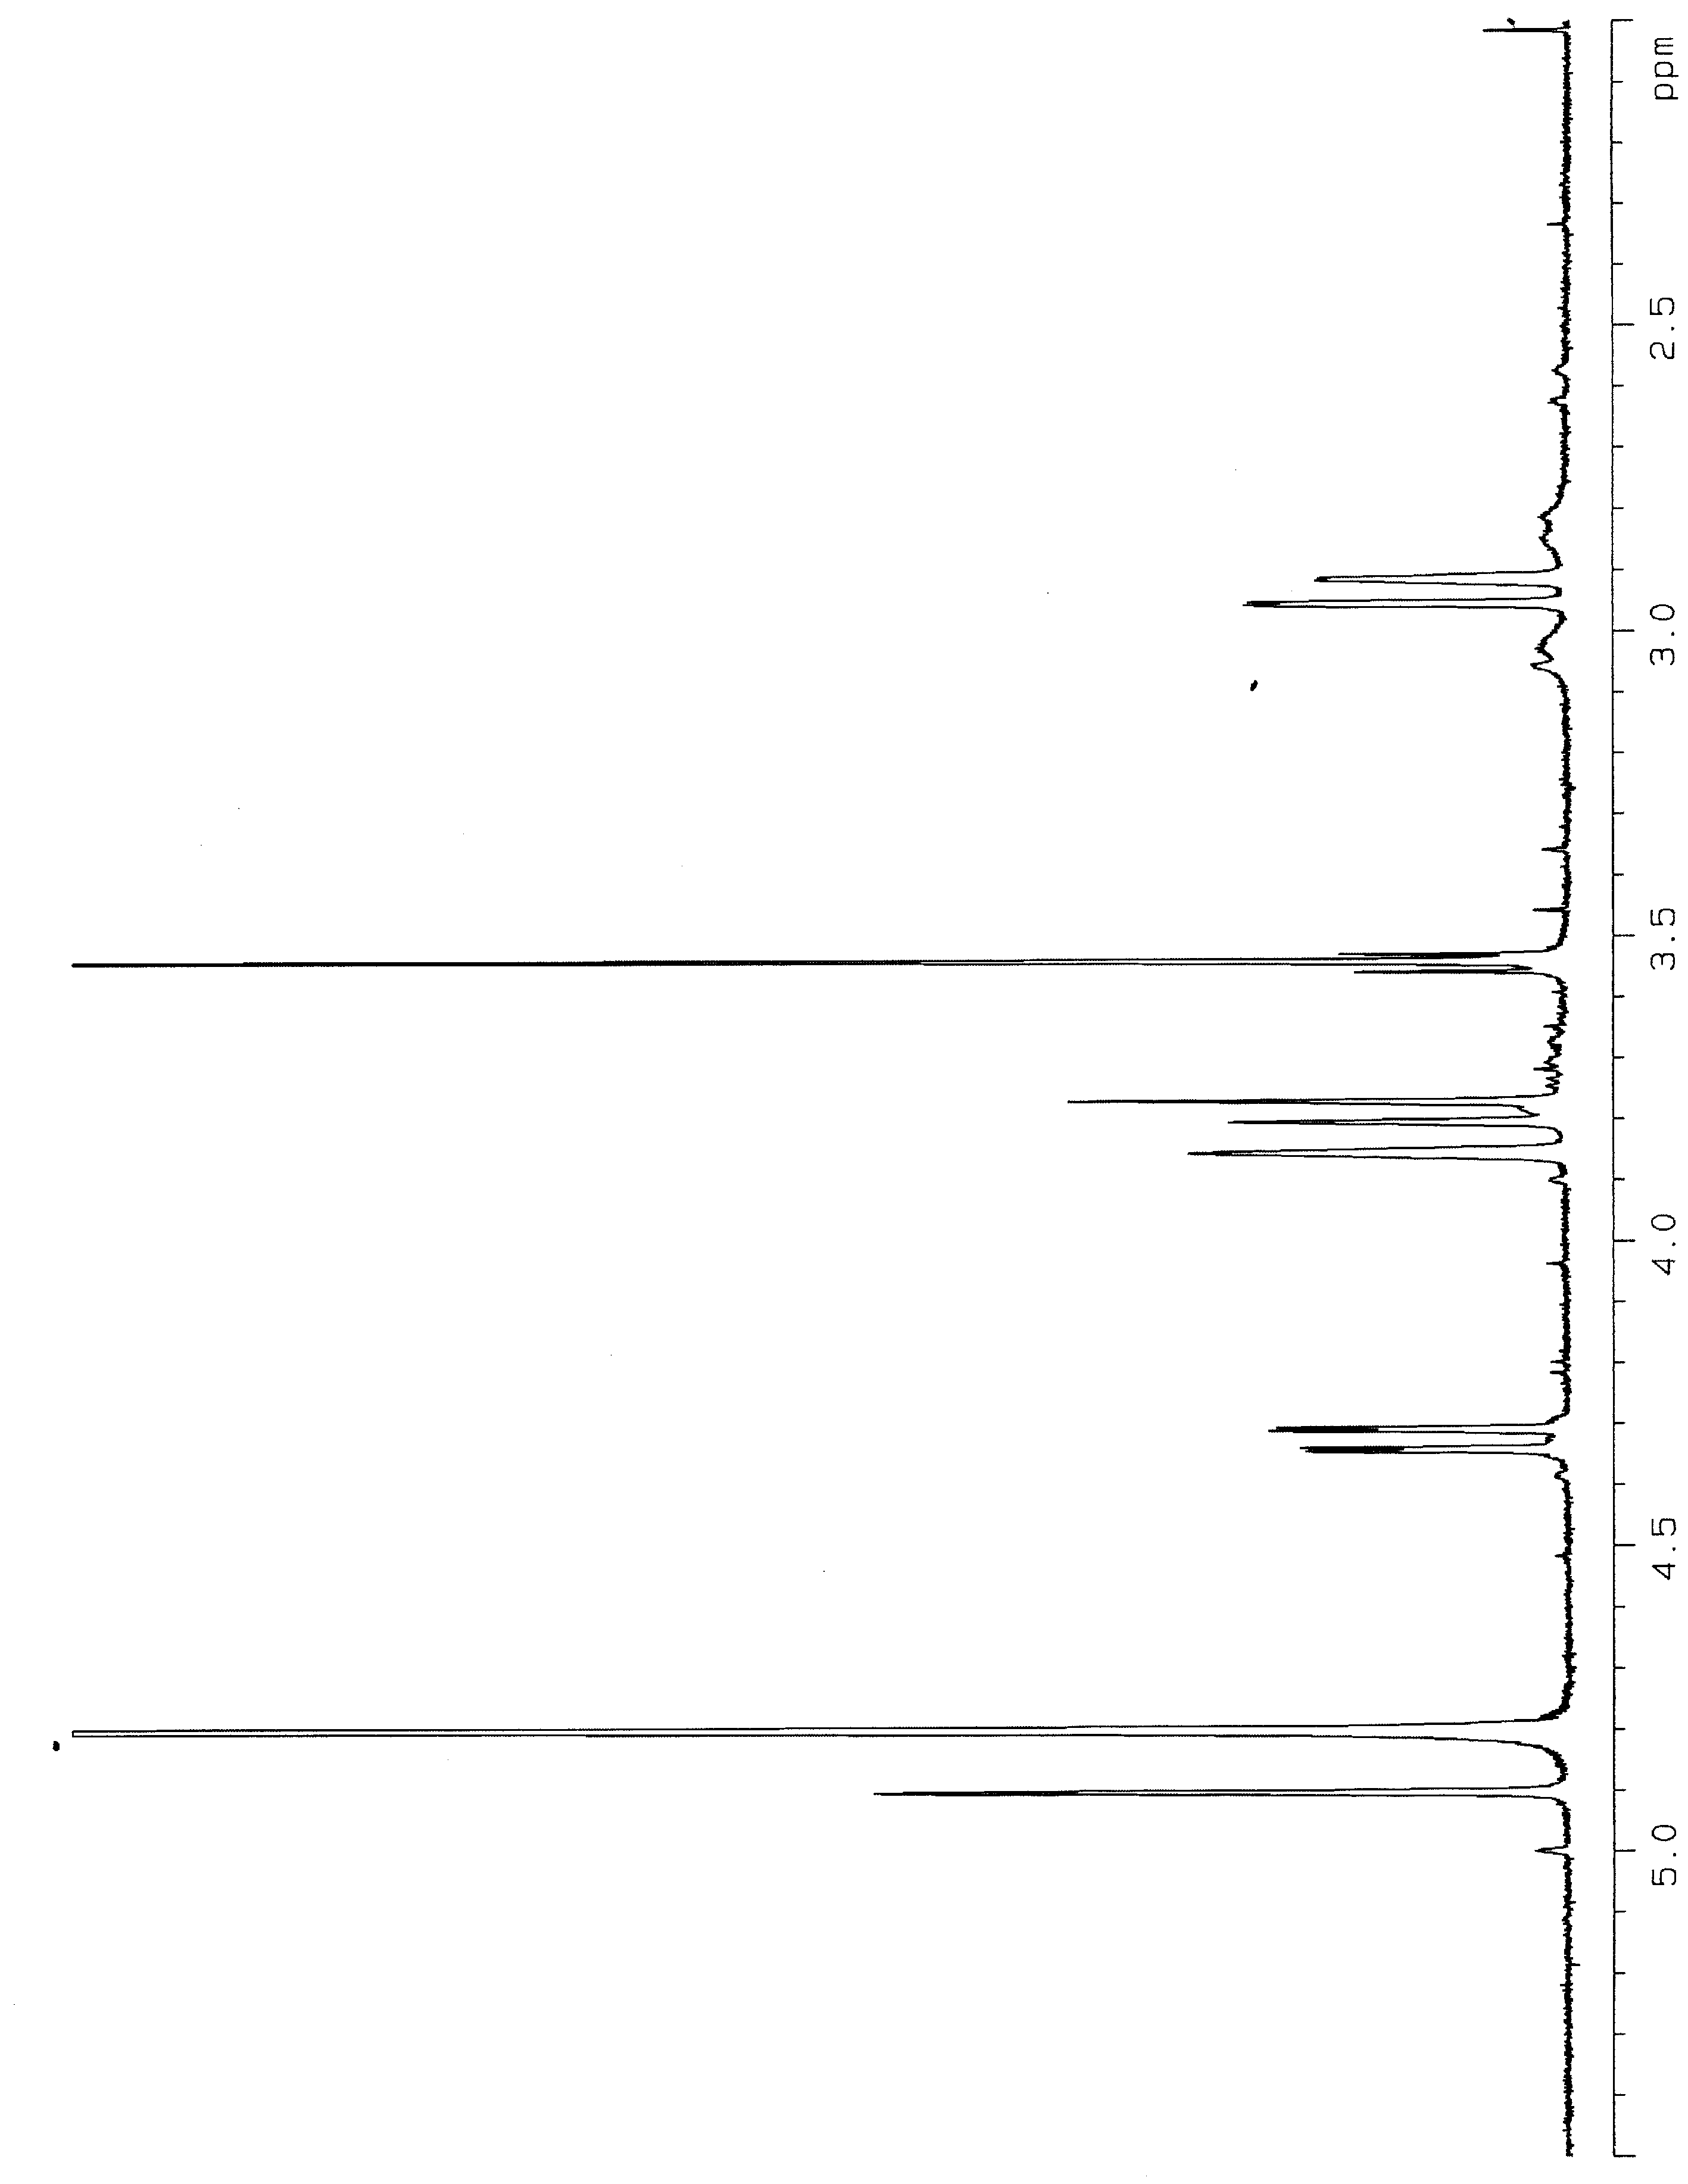


Figure S34. 1H NMR spectrum of **7** in D2O.


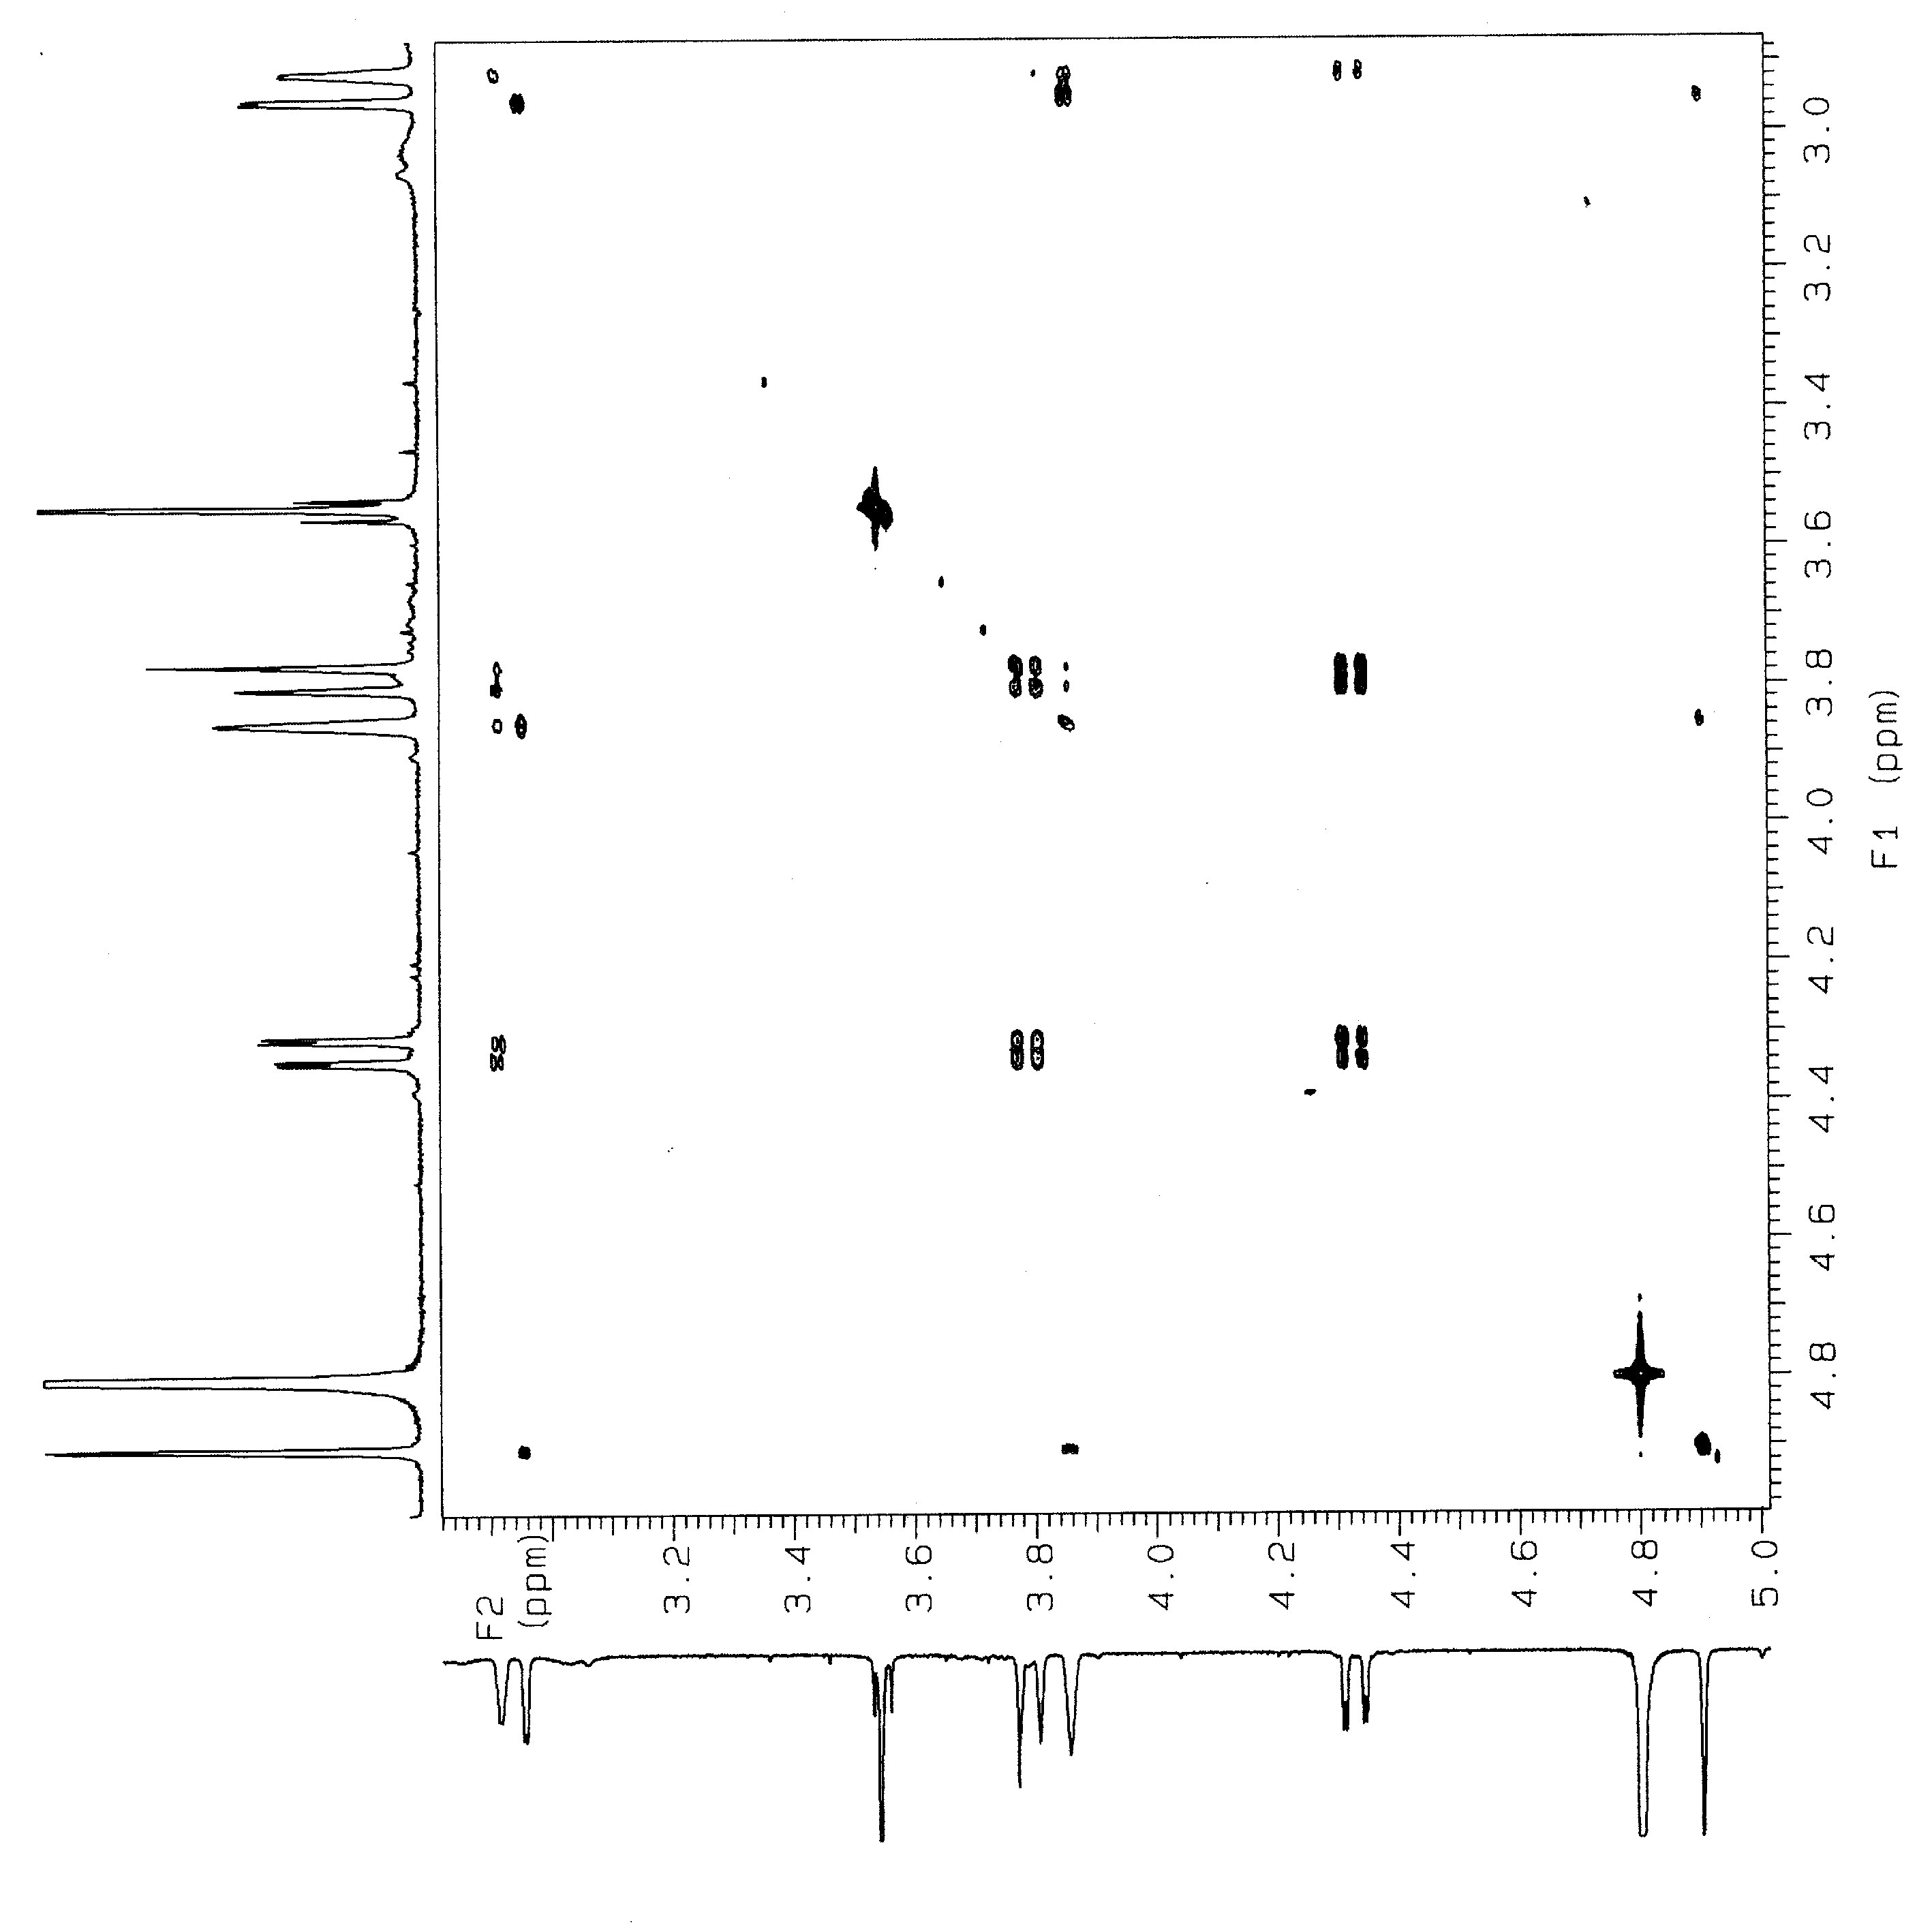


Figure S35. COSY spectrum of **7** in D2O.


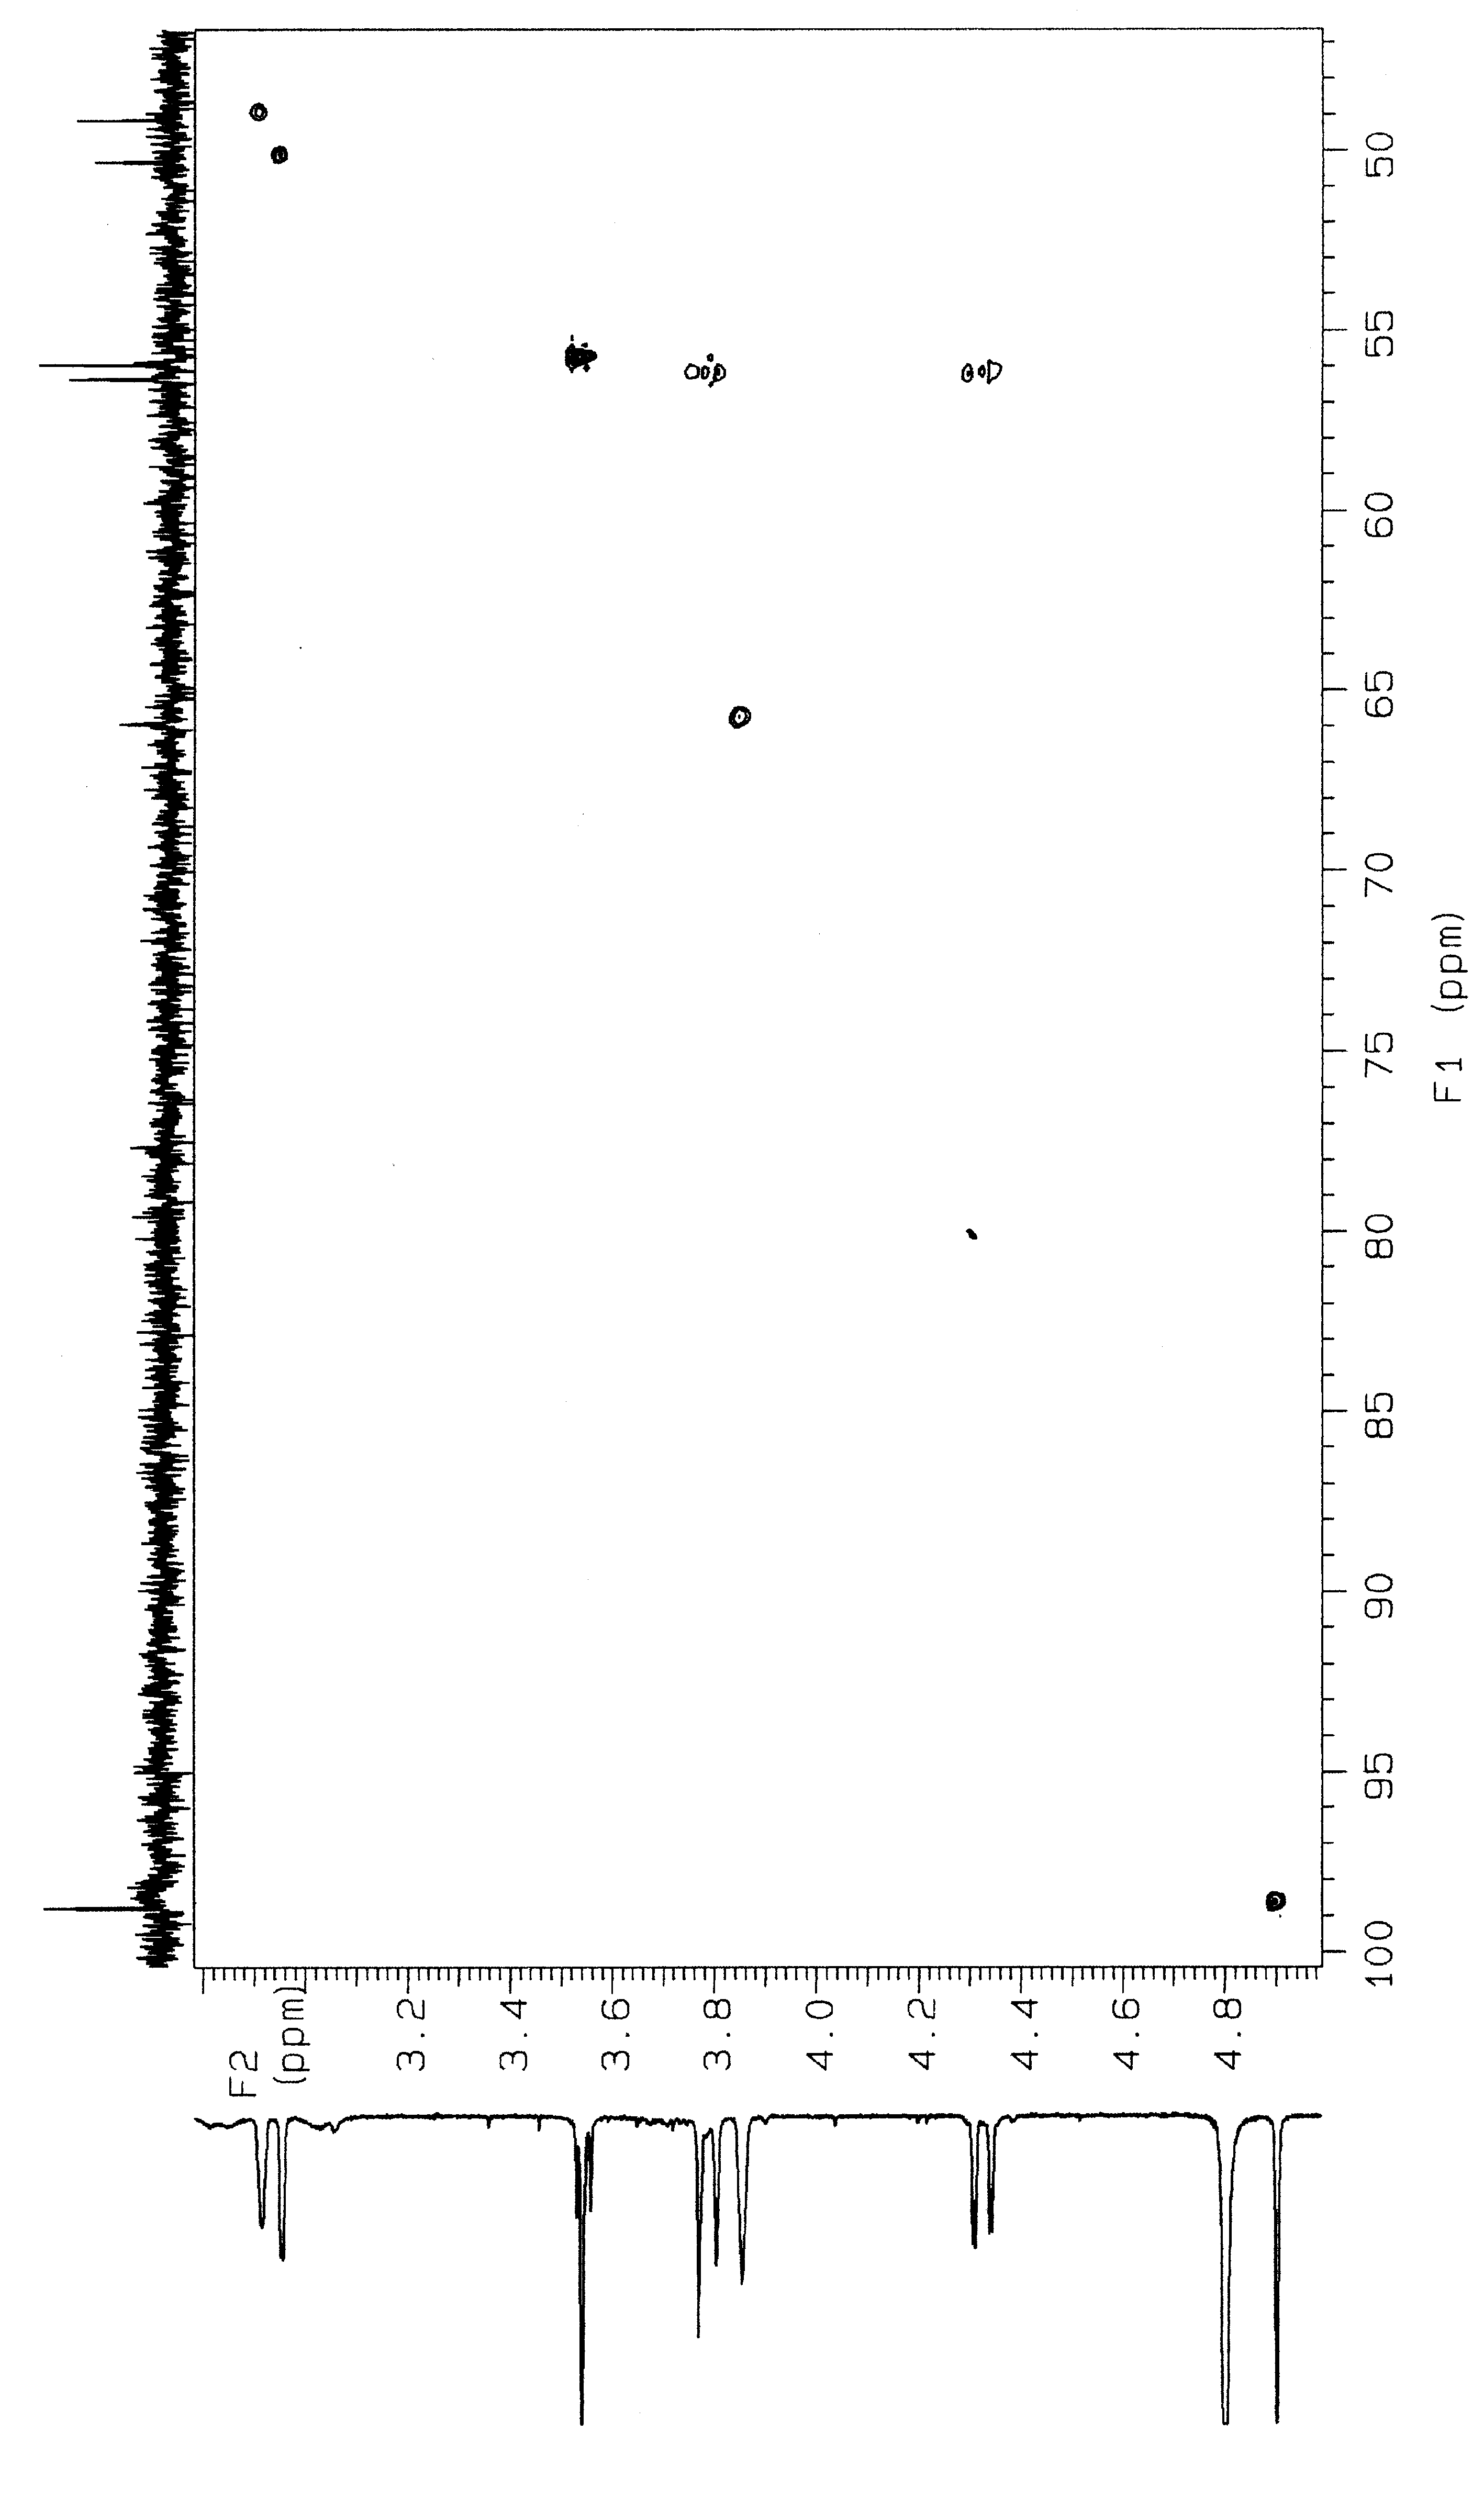


Figure S36. HMQC spectrum of **7** in D2O.


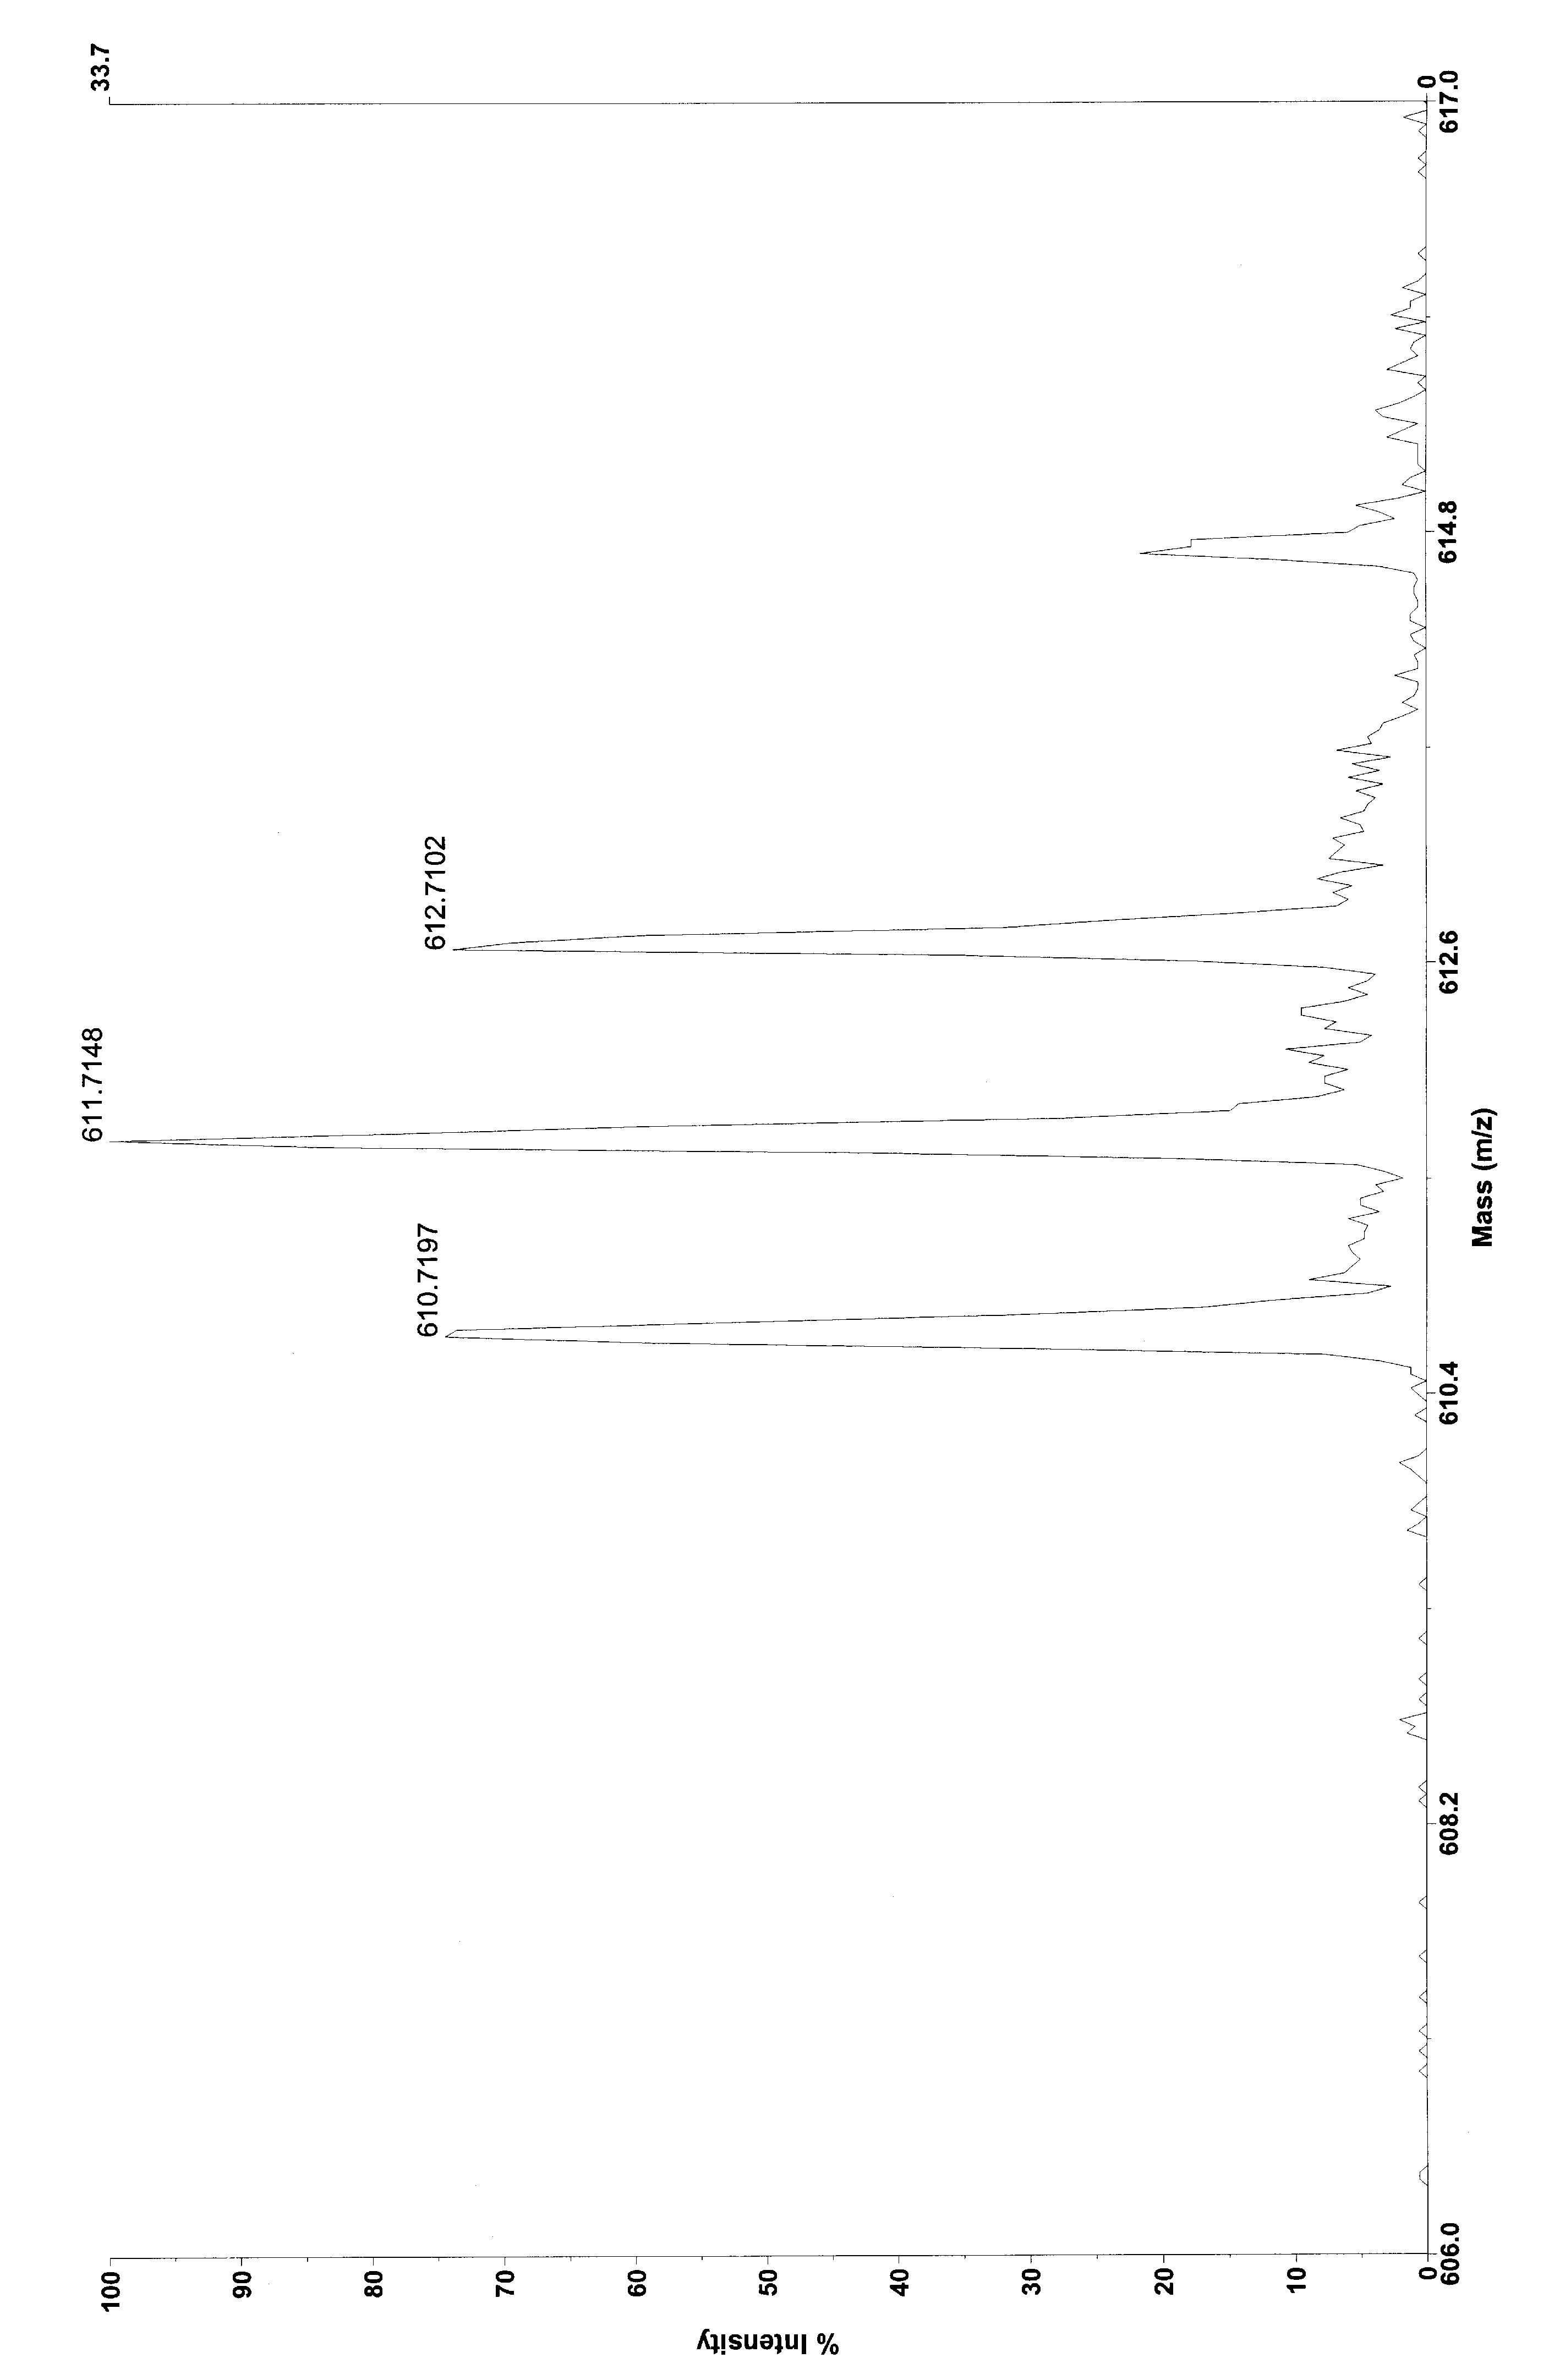


Figure S37.Observed ESI mass spectrum of **7**.


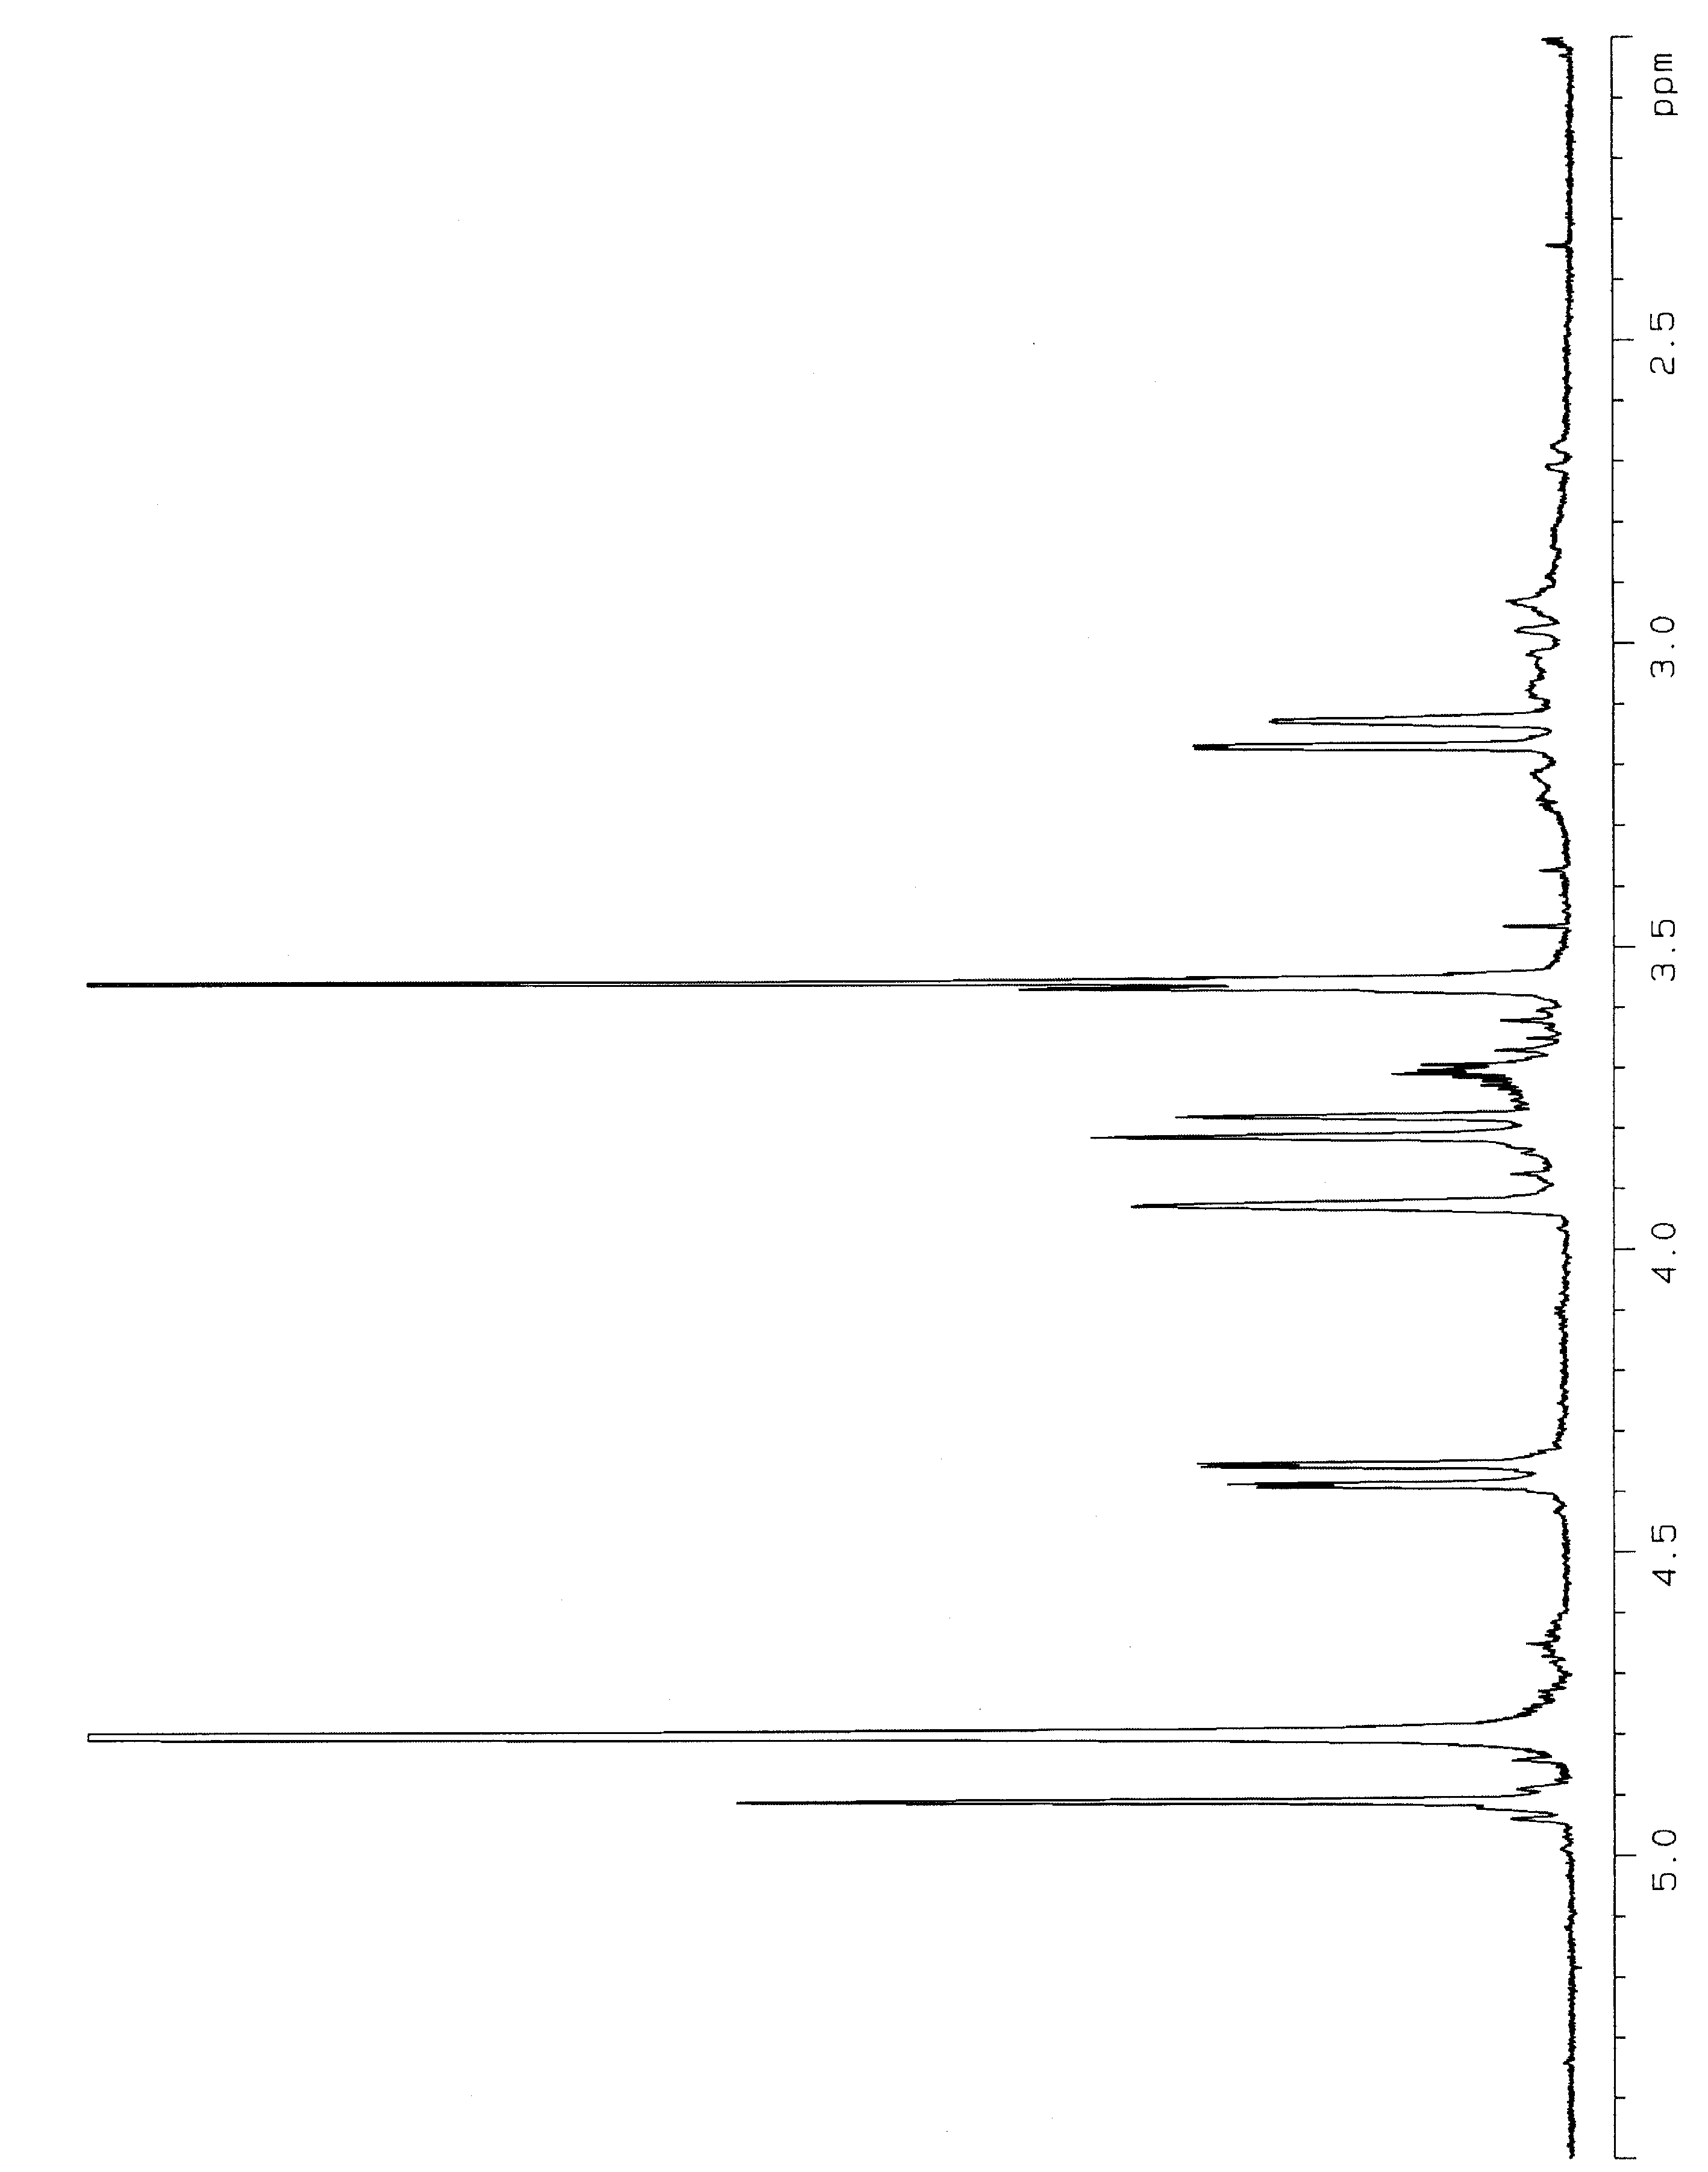


Figure S38. 1H NMR spectrum of **8** in D2O.


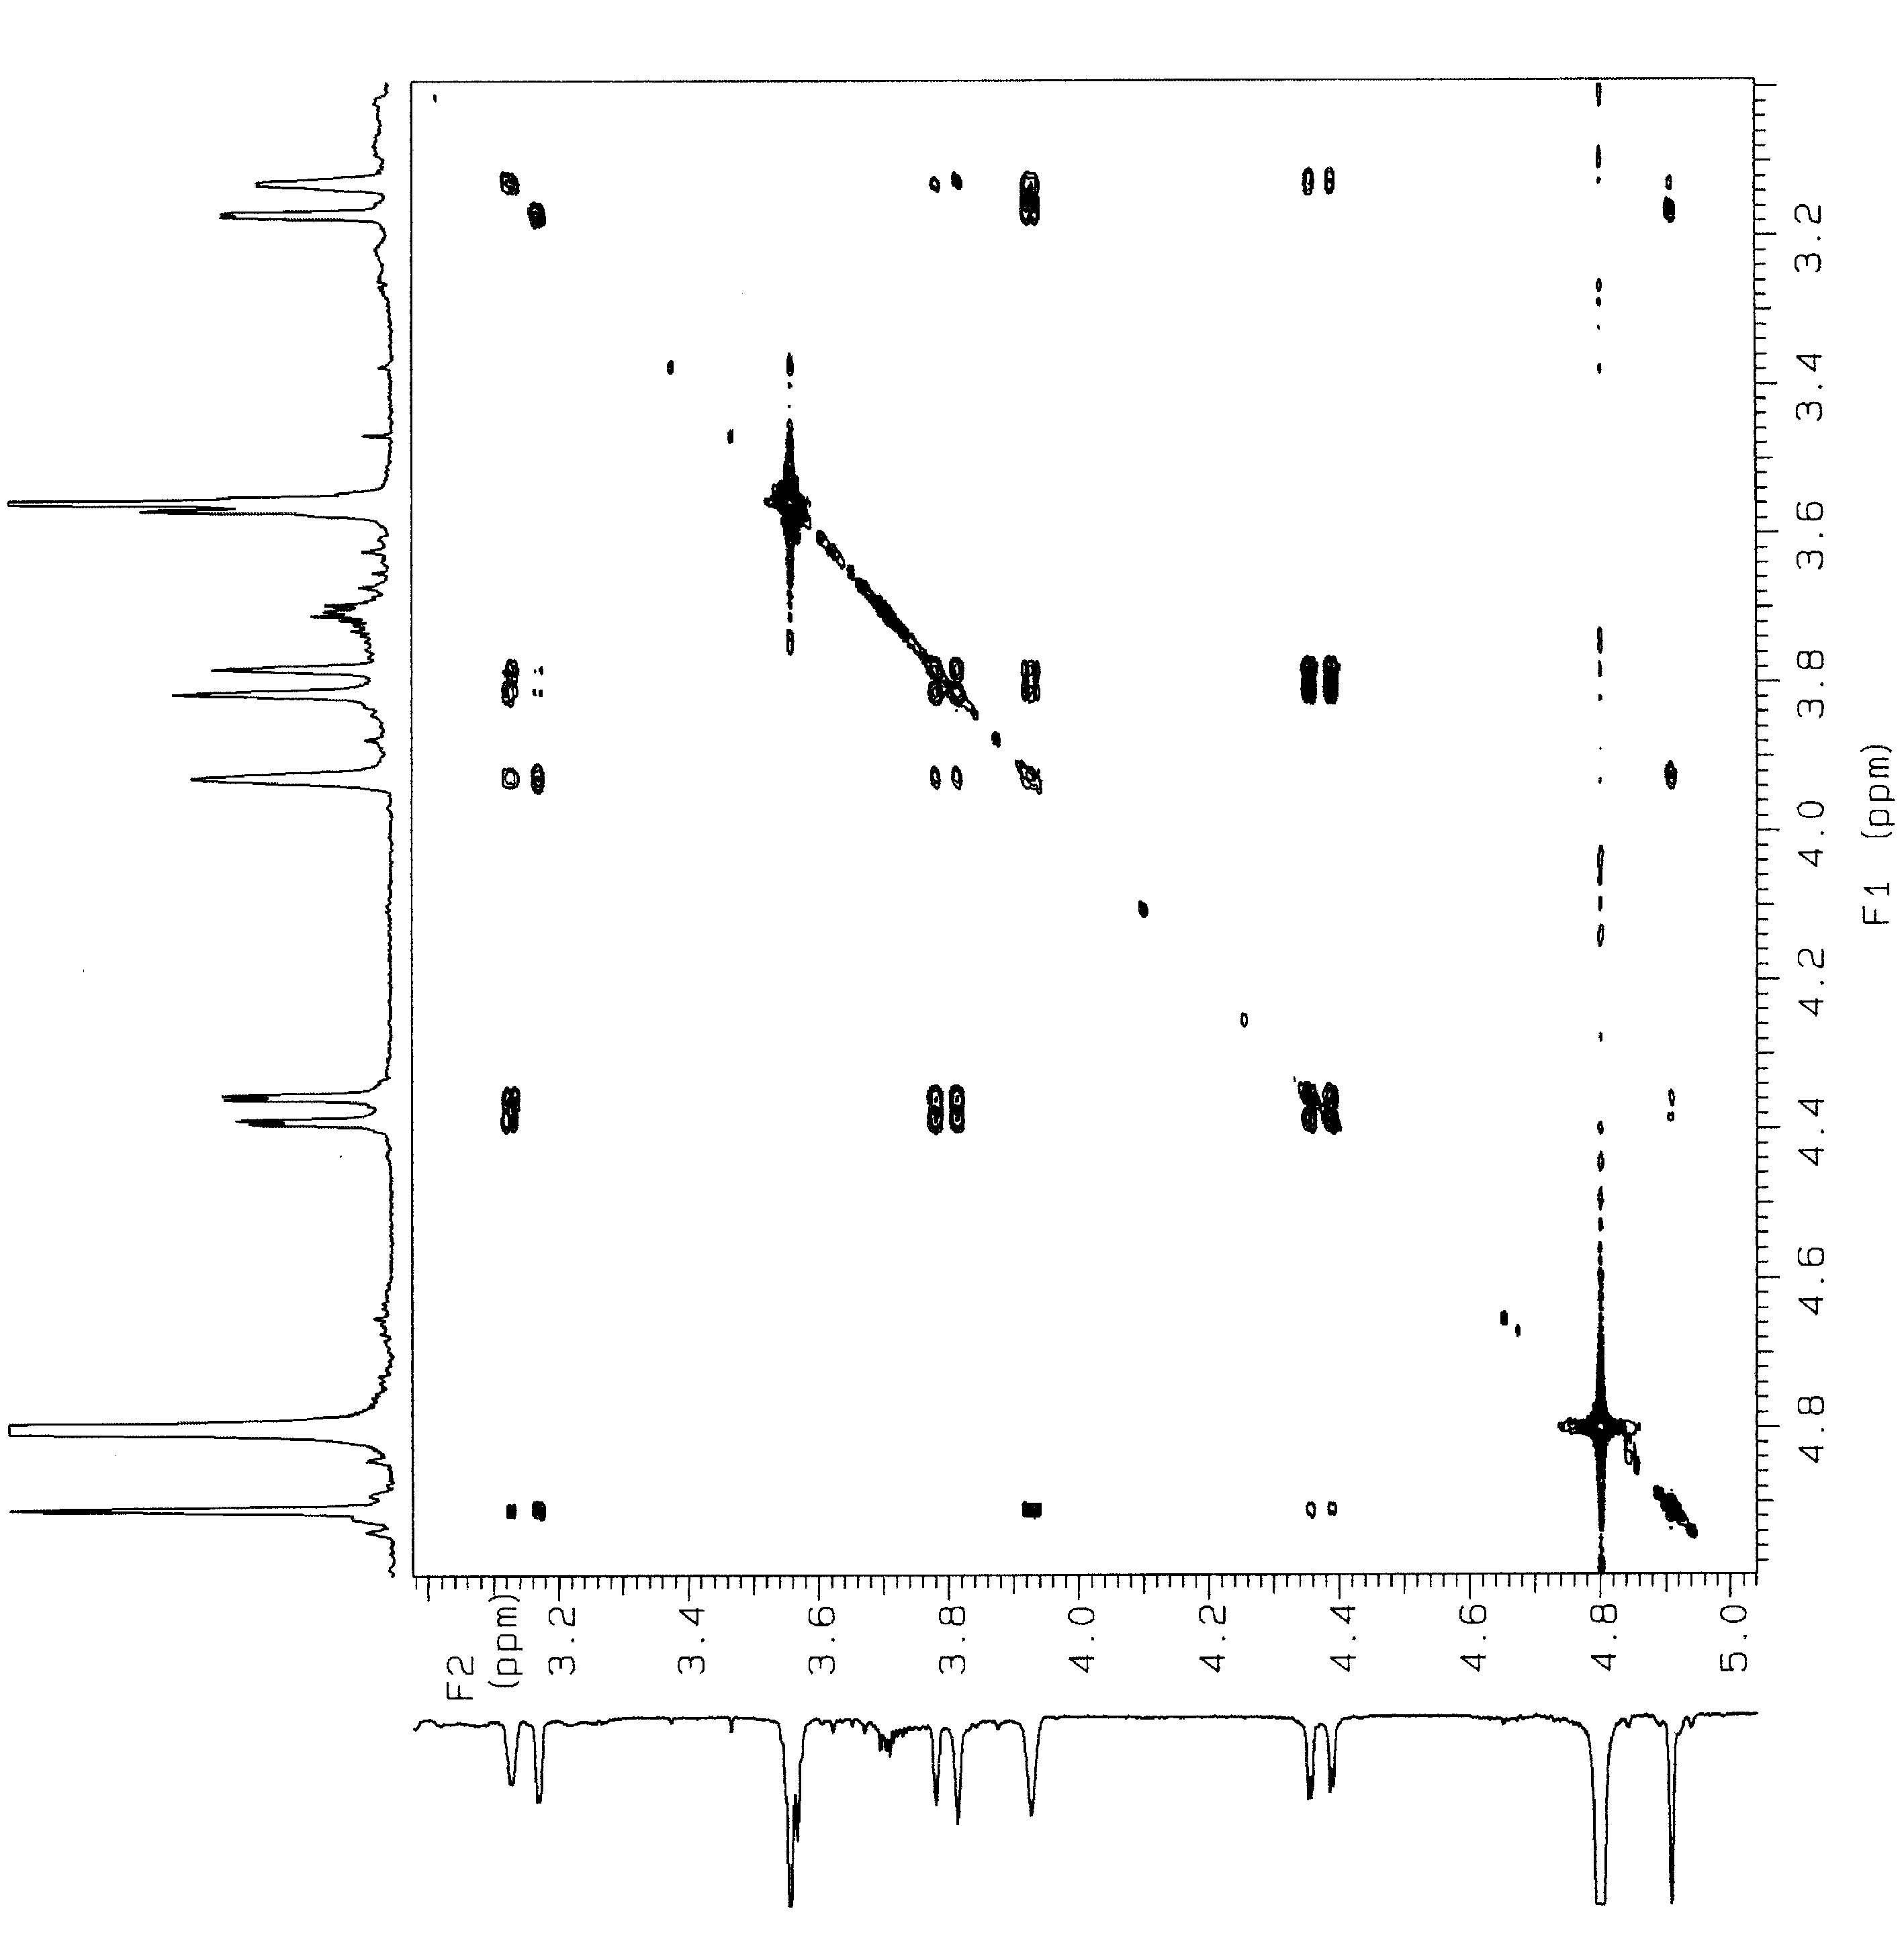


Figure S39. COSY spectrum of **8** in D2O.


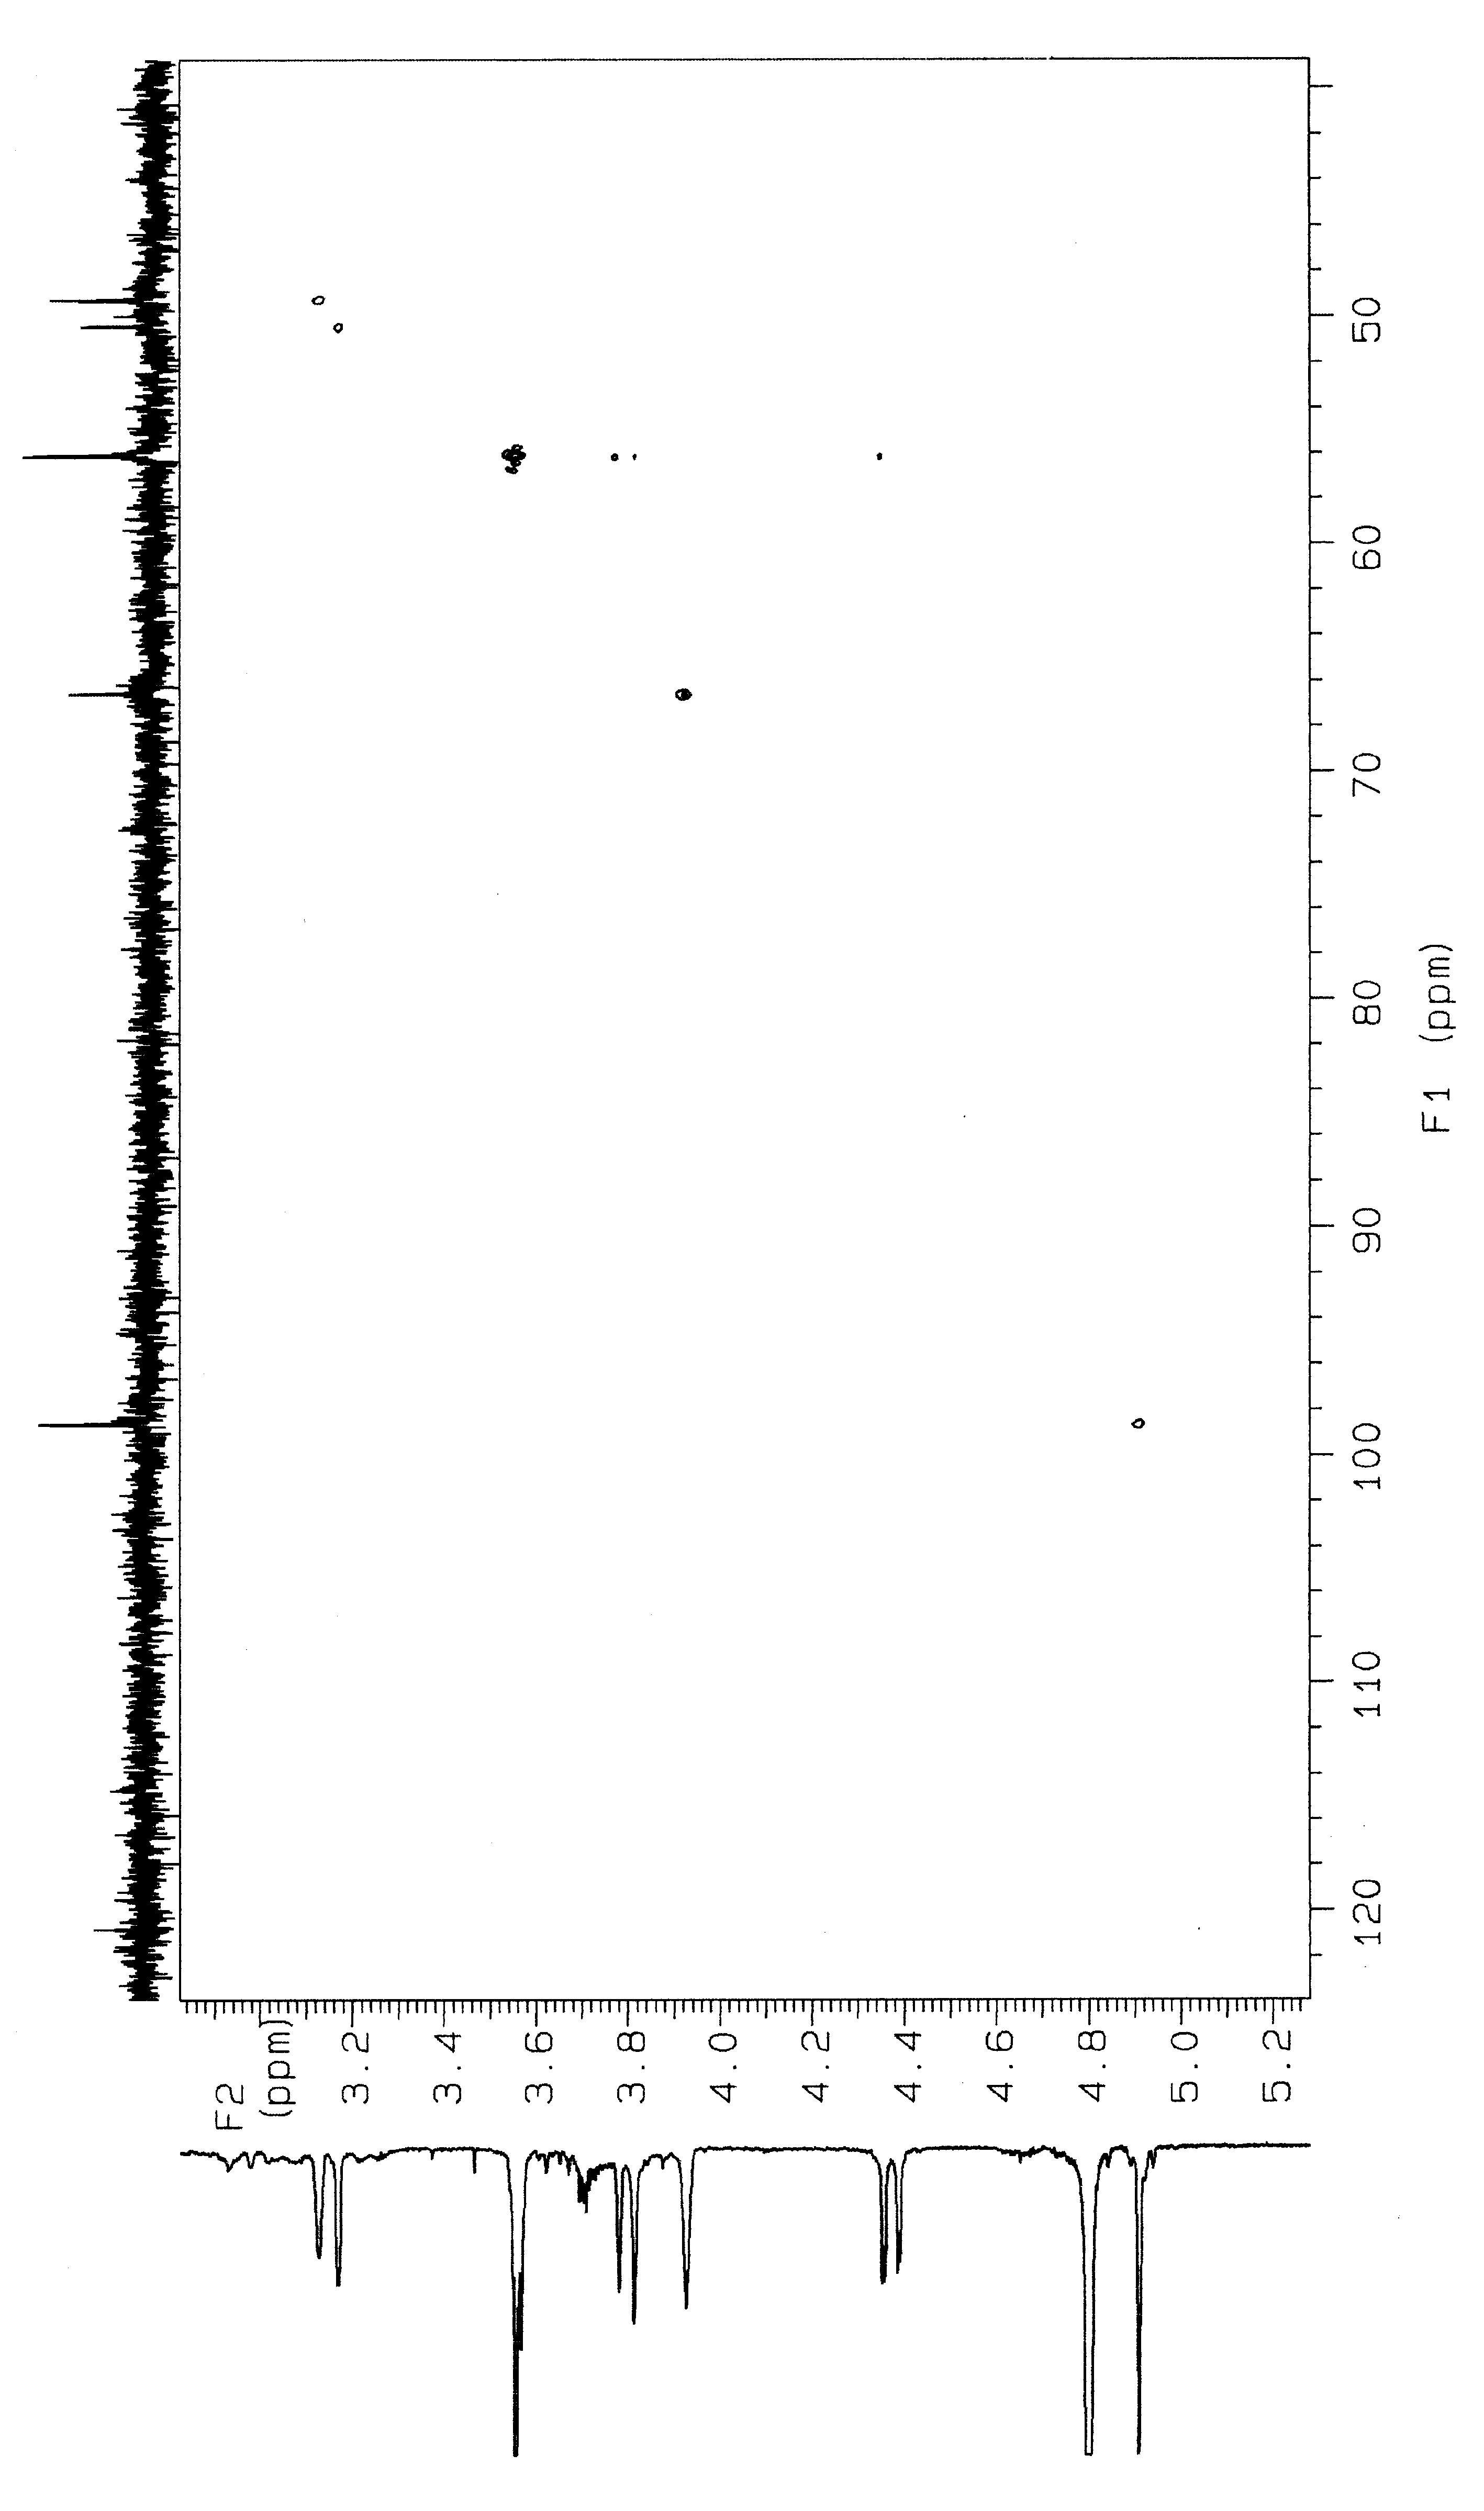


Figure S40. HMQC spectrum of **8** in D2O.


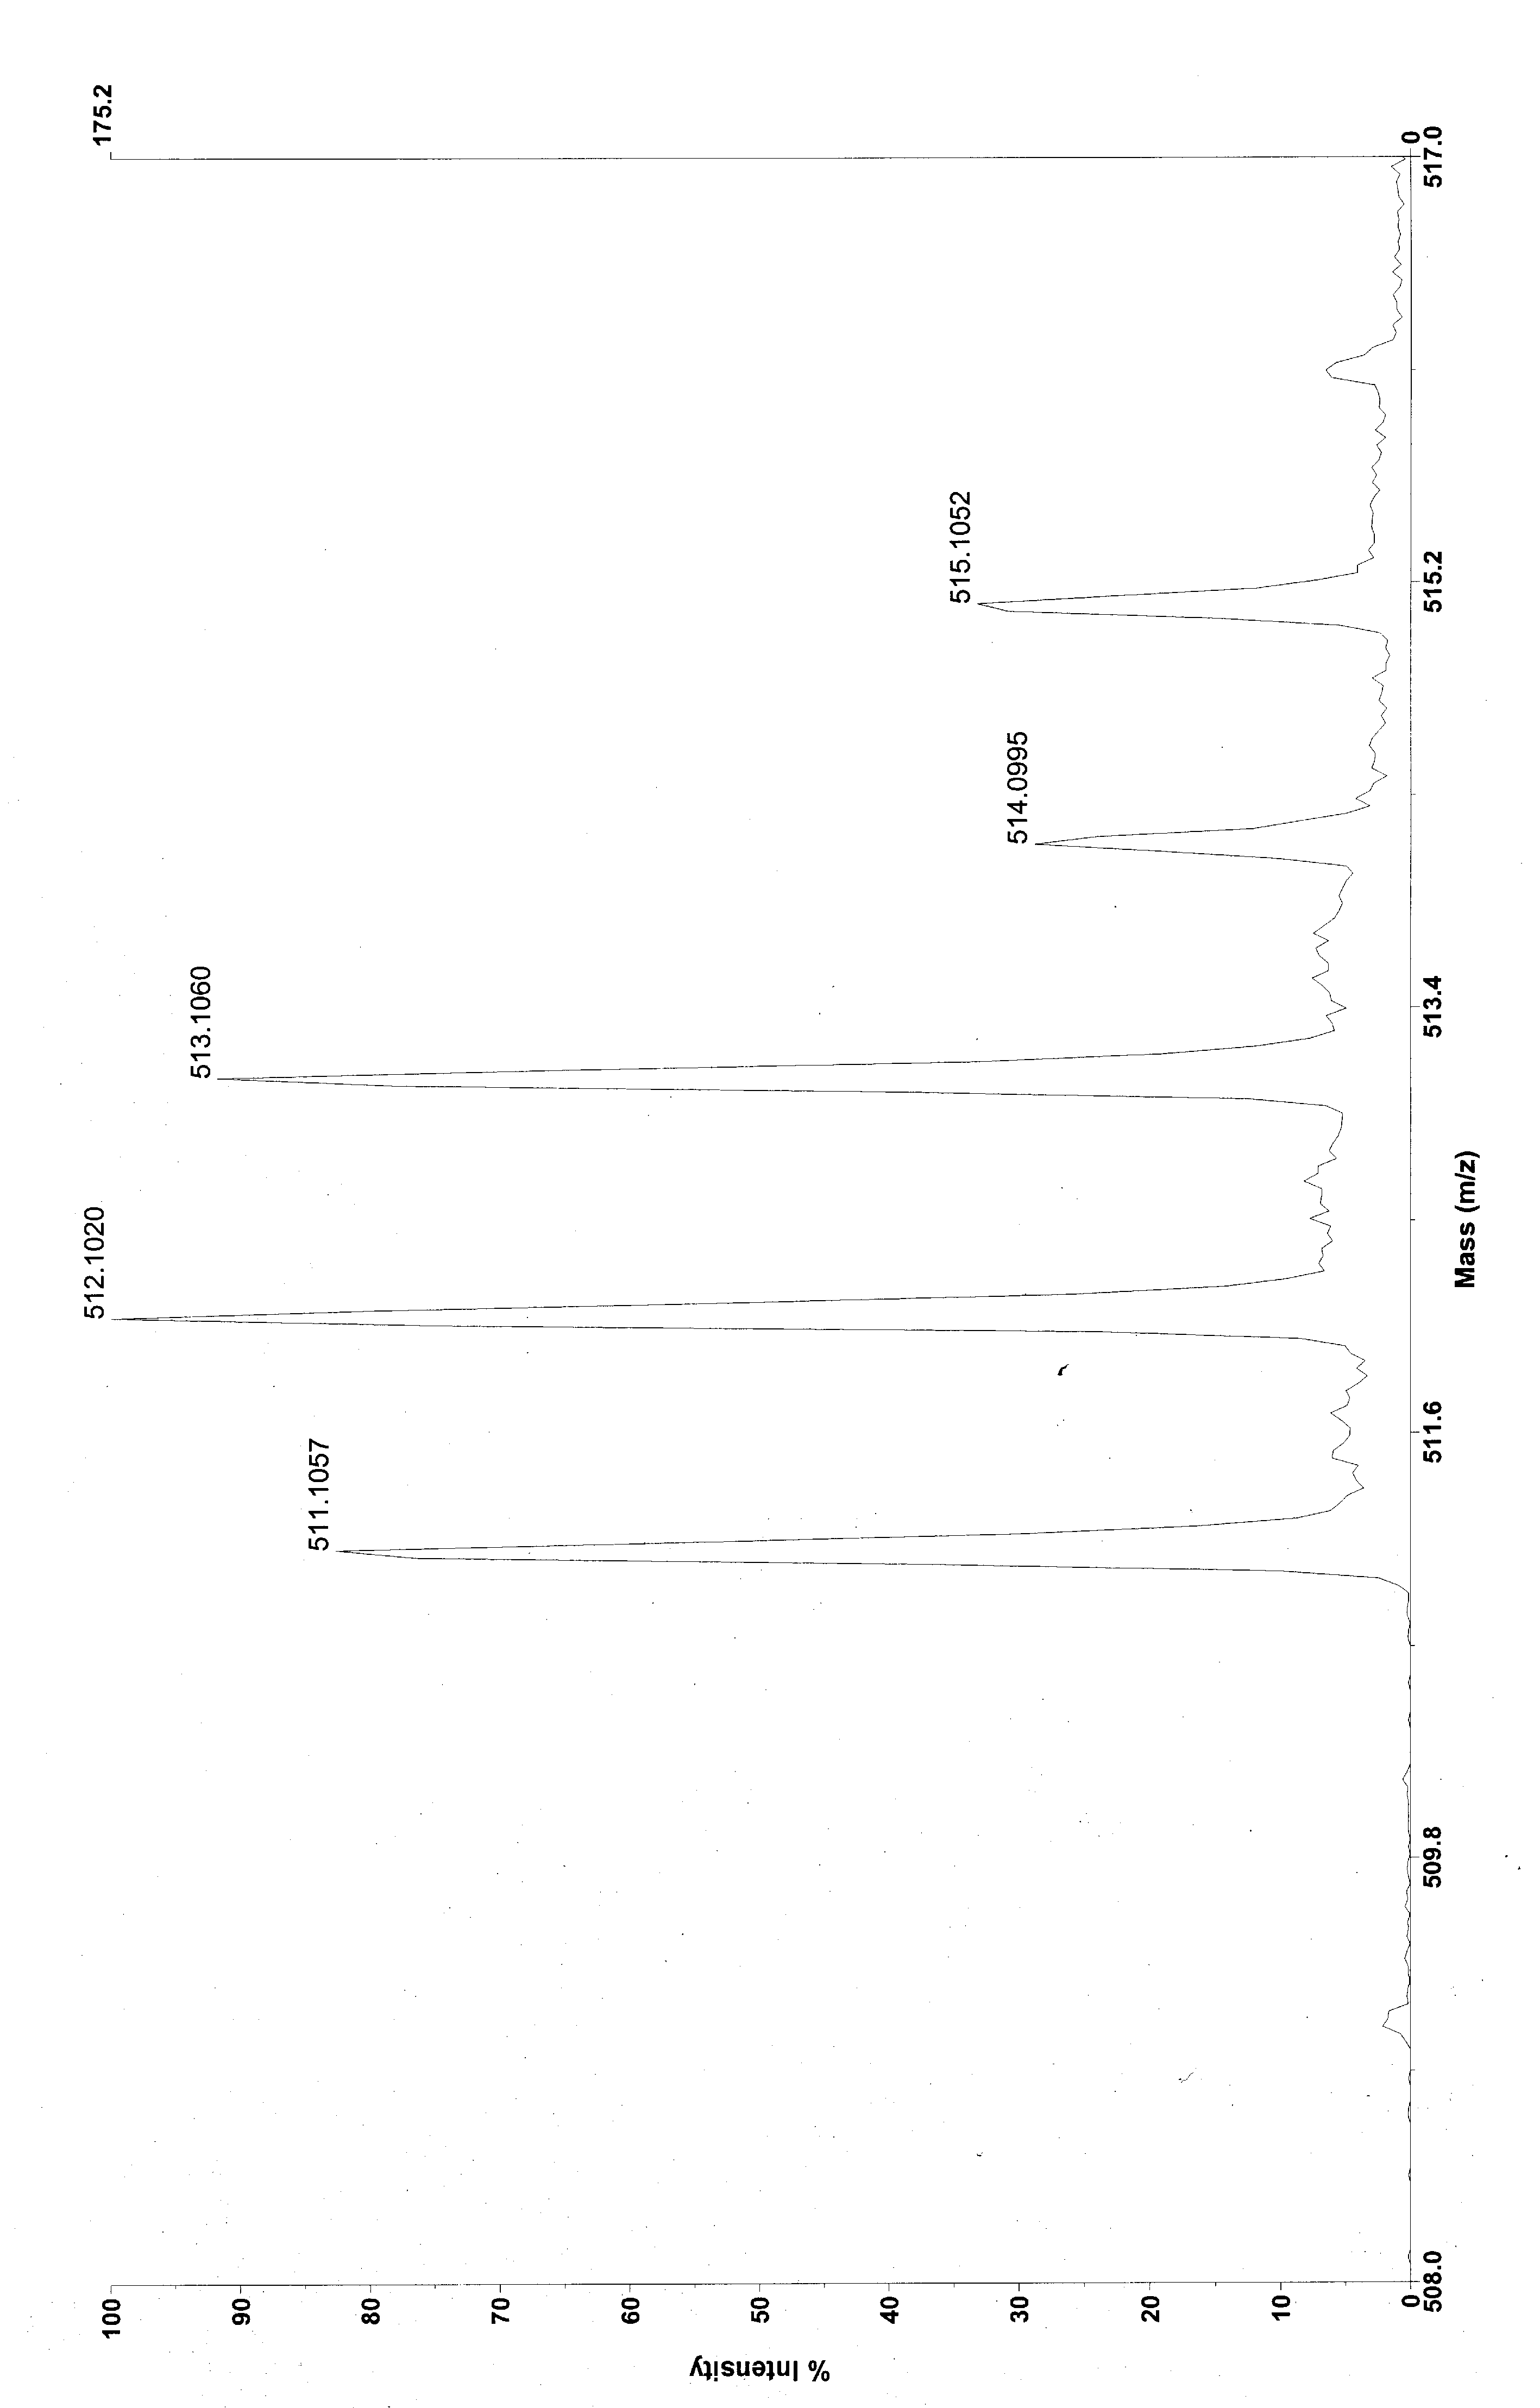


Figure S41.Observed ESI mass spectrum of **8**.

Figure S42. Time course of 1H NMR spectra for unchelation of the Pt (II) complex **6** in NaOAc-*d*3 buffer (pH 7.0) at 0 min (a), 10 min (b), 20 min (c), and 120 min (d).
